# Supplementary material for: Concomitant functionalization of two different ketones by merging Brønsted acid catalysis and radical relay coupling
Source: Royal Society of Chemistry journal article supplement (doi:10.1039/d1qo01787j), 2022-01-01
Supplement: d1qo01787j1.pdf [file d1qo01787j1.pdf]

# Supporting Information

## Concomitant Functionalization of Two Different Ketones by Merging Brønsted Acid Catalysis and Radical Relay Coupling

Leilei Wang, Leiyang Lv\*, Zhiping Li\*

*Key Laboratory of Advanced Light Conversion Materials and Biophotonics, Department of Chemistry, Renmin*

*University of China, Beijing 100872, China*

*Email: lvleiyang2008@ruc.edu.cn, zhipingli@ruc.edu.cn*

### Contents

|                                                                                                       |     |
|-------------------------------------------------------------------------------------------------------|-----|
| 1. General information                                                                                | S2  |
| 2. General procedure for synthesis of start materials <b>1</b>                                        | S3  |
| 3. General procedure for synthesis of products <b>3</b>                                               | S4  |
| 4. Large scale synthesis and transformation                                                           | S14 |
| 5. Mechanistic studies                                                                                | S16 |
| 6. References                                                                                         | S20 |
| 7. Copies of <sup>1</sup> H NMR and <sup>13</sup> C NMR, <sup>19</sup> F NMR spectra for all products | S20 |

## 1. General information

<sup>1</sup>H NMR spectra were recorded on Bruker 400 MHz and 600 MHz spectrometer and the chemical shifts were reported in parts per million ( $\delta$ ) relative to internal standard TMS (0 ppm) for CDCl<sub>3</sub>. The peak patterns are indicated as follows: s, singlet; d, doublet; dd, doublet of doublet; t, triplet; m, multiplet; q, quartet. The coupling constants, *J*, are reported in Hertz (Hz). <sup>13</sup>C NMR spectra were obtained at Bruker 100 MHz, 150 MHz and referenced to the internal solvent signals (central peak is 77.0 ppm in CDCl<sub>3</sub>). CDCl<sub>3</sub> was used as the NMR solvent. APEX II (Bruker Inc.) was used for ESI-MS and EI-MS. Flash column chromatography was performed over silica gel 200-300. All reagents were weighed and handled in air at room temperature. All chemical reagents were purchased from Alfa, Aldrich, TCI, and J&K and used without further purification.

**CAUTION-1:** Mixing a metal salt and peroxide can cause explosion. See: Jones, A. K.; Wilson, T. E.; Nikam, S. S. *In Encyclopedia of Reagents for Organic Synthesis*, Paquette, L. A. Ed.; John Wiley & Sons, Inc. **1995**, 2, 880.

## 2. General procedure for synthesis of start materials 1

All the unactivated alkene substrate **1** was known compounds. Unactivated alkenes **1a-1t**<sup>1,2</sup> and **1u**<sup>3</sup> were prepared as followed procedure.

(a) General procedure for the synthesis of **1a-1t**.

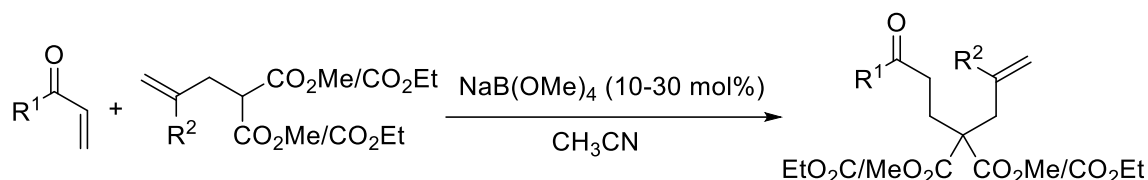

To a 25 mL round bottom flask with a magnetic stir bar a solution of Michael donor (1.0 mmol) and  $NaB(OMe)_4$  (0.10-0.30 mmol, 10-30 mol %) in MeCN (3.0 mL) was added  $\alpha,\beta$ -unsaturated ketone (1.0-2.0 mmol) at room temperature. The resulting solution was stirred at room temperature or 50 °C under air atmosphere and monitored by TLC. Upon completion, solvent was removed under reduced pressure, and the residue was purified by flash column chromatography on silica gel (ethyl acetate/petroleum ether = 1/12-1/4) to give the desired products in good yield.

(b) General procedure for the synthesis of **1u**.

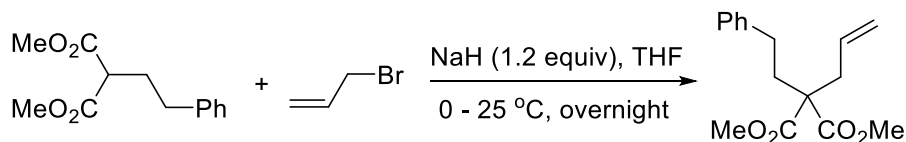

To a stirred suspension of NaH (60% in mineral oil, 2.4 mmol.) in dry THF (6.0 ml) at 0 °C was added a solution of dimethyl 2-phenethylmalonate (2.0 mmol) in THF (2.0 mL). The reaction mixture was kept for 0.5 h, and then a solution of allyl bromide (2.2 mmol) in THF (2.0 mL) was added dropwise, and then allowed to stir at room temperature for 12 h. Quenched with saturated  $NH_4Cl$ , extracted with ethyl acetate, and washed with brine. The organic phase was dried over anhydrous  $Na_2SO_4$  and concentrated. The residue was purified by column chromatography on silica gel (EtOAc/petroleum ether = 1:15) to give disubstituted product **1u** as a colorless oil.

### 3. General procedure for synthesis of products 3

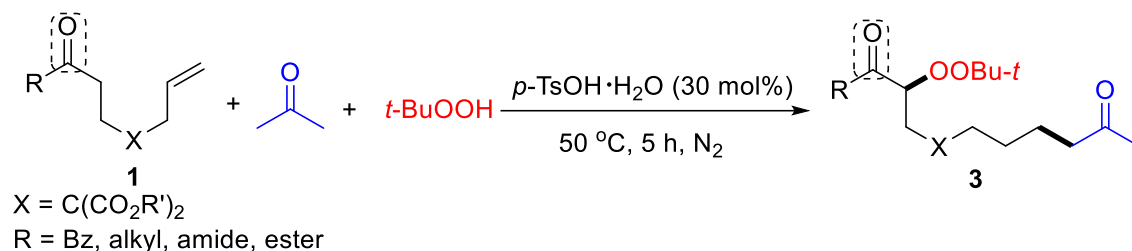

To a 10 mL sealable pressure tube was added unactivated alkenes **1** (0.1 mmol), *p*-TsOH·H<sub>2</sub>O (0.03 mmol), acetone (0.6 mL) and *t*-BuOOH (5.5 M in decane, 0.5 mmol) under N<sub>2</sub> atmosphere at room temperature, and the resulting solution was stirred at 50 °C for 5 h. The resulting mixture and the solvent were evaporated under vacuum. The residue was purified by flash column chromatography on silica gel (eluent: ethyl acetate/petroleum ether) to give the peroxides **3a-3u**.

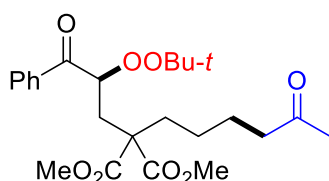

**Dimethyl 2-(2-(*tert*-butylperoxy)-3-oxo-3-phenylpropyl)-2-(5-oxohexyl)malonate (3a):** Isolated by flash column chromatography (ethyl acetate/petroleum ether = 3:1,  $R_f = 0.4$ ) in 64% yield (28.7 mg); Colorless oil; <sup>1</sup>H NMR (600 MHz, CDCl<sub>3</sub>, ppm)  $\delta$  8.07 (d,  $J = 7.2$  Hz, 2H), 7.58 (t,  $J = 7.4$  Hz, 1H), 7.47 (t,  $J = 7.8$  Hz, 2H), 5.16 (dd,  $J = 7.0, 5.5$  Hz, 1H), 3.72 (s, 3H), 3.71 (s, 3H), 2.45-2.43 (m, 4H), 2.13 (s, 3H), 2.12-2.06 (m, 1H), 2.04-1.99 (m, 1H), 1.63-1.58 (m, 2H), 1.27-1.19 (m, 2H), 1.13 (s, 9H); <sup>13</sup>C NMR (150 MHz, CDCl<sub>3</sub>, ppm)  $\delta$  208.5, 197.9, 171.3, 171.2, 135.2, 133.3, 129.0, 128.5, 81.6, 80.8, 55.9, 52.7, 52.6, 43.2, 33.2, 32.8, 29.9, 26.4, 23.8; HRMS (ESI) calcd for C<sub>24</sub>H<sub>34</sub>O<sub>8</sub>Na (M+Na)<sup>+</sup>: 473.2146; found: 473.2141.

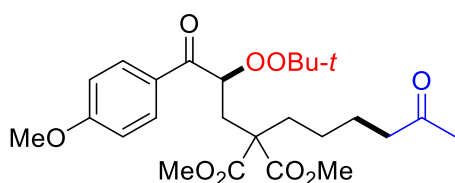

**Dimethyl 2-(2-(*tert*-butylperoxy)-3-(4-methoxyphenyl)-3-oxopropyl)-2-(5-oxohexyl)malonate (3b):** Isolated by flash column chromatography (ethyl acetate/petroleum ether = 3:1,  $R_f = 0.35$ ) in 63% yield (30.2 mg); Colorless oil; <sup>1</sup>H NMR (600 MHz, CDCl<sub>3</sub>, ppm)  $\delta$  7.97 (d,  $J = 8.2$  Hz, 2H), 7.27 (d,

$J = 8.6$  Hz, 2H), 5.15 (t,  $J = 6.2$  Hz, 1H), 3.72 (s, 3H), 3.71 (s, 3H), 2.45-2.41 (m, 7H), 2.13 (s, 3H), 2.11-2.05 (m, 1H), 2.03-1.98 (m, 1H), 1.63-1.58 (m, 2H), 1.26-1.18 (m, 2H), 1.14 (s, 9H);  $^{13}\text{C}$  NMR (150 MHz,  $\text{CDCl}_3$ , ppm)  $\delta$  208.6, 196.2, 171.4, 171.3, 163.7, 131.4, 128.1, 113.7, 81.6, 80.8, 55.9, 55.5, 52.7, 52.6, 43.2, 33.4, 32.8, 29.9, 26.4, 23.8; HRMS (ESI) calcd for  $\text{C}_{25}\text{H}_{36}\text{O}_9\text{Na}$  ( $\text{M}+\text{Na}$ ) $^+$ : 503.2252; found: 503.2254.

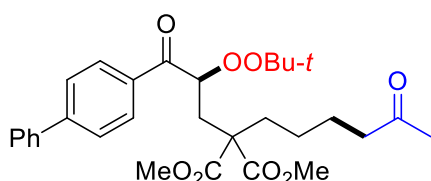

**Dimethyl 2-(3-([1,1'-biphenyl]-4-yl)-2-(*tert*-butylperoxy)-3-oxopropyl)-2-(5-oxohexyl)malonate (3c):** Isolated by flash column chromatography (ethyl acetate/petroleum ether = 3:1,  $R_f = 0.4$ ) in 63% yield (32.9 mg); Colorless oil;  $^1\text{H}$  NMR (600 MHz,  $\text{CDCl}_3$ , ppm)  $\delta$  8.16 (d,  $J = 8.4$  Hz, 2H), 7.70 (d,  $J = 8.4$  Hz, 2H), 7.65 (d,  $J = 7.3$  Hz, 2H), 7.48 (t,  $J = 7.4$  Hz, 2H), 7.41 (t,  $J = 7.4$  Hz, 1H), 5.19 (t,  $J = 6.5$  Hz, 1H), 3.73 (s, 3H), 3.72 (s, 3H), 2.47-2.44 (m, 4H), 2.13 (s, 3H), 2.10-2.08 (m, 1H), 2.06-2.01 (m, 1H), 1.64-1.59 (m, 2H), 1.29-1.19 (m, 2H), 1.15 (s, 9H);  $^{13}\text{C}$  NMR (150 MHz,  $\text{CDCl}_3$ , ppm)  $\delta$  208.5, 197.4, 171.4, 171.3, 145.9, 139.9, 133.8, 129.7, 129.0, 128.3, 127.3, 127.1, 81.8, 80.9, 55.9, 52.7, 52.6, 43.2, 33.3, 32.8, 30.0, 26.4, 23.8; HRMS (ESI) calcd for  $\text{C}_{30}\text{H}_{38}\text{O}_8\text{Na}$  ( $\text{M}+\text{Na}$ ) $^+$ : 549.2459; found: 549.2455.

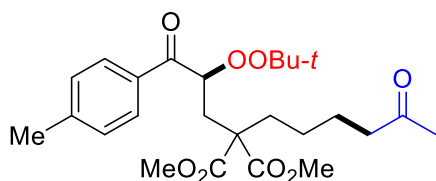

**Dimethyl 2-(2-(*tert*-butylperoxy)-3-oxo-3-(*p*-tolyl)propyl)-2-(5-oxohexyl)malonate (3d):** Isolated by flash column chromatography (ethyl acetate/petroleum ether = 3:1,  $R_f = 0.4$ ) in 65% yield (30.1 mg); Colorless oil;  $^1\text{H}$  NMR (600 MHz,  $\text{CDCl}_3$ , ppm)  $\delta$  7.97 (d,  $J = 8.2$  Hz, 2H), 7.27 (d,  $J = 8.6$  Hz, 2H), 5.15 (t,  $J = 6.2$  Hz, 1H), 3.72 (s, 3H), 3.71 (s, 3H), 2.45-2.41 (m, 7H), 2.13 (s, 3H), 2.11-2.05 (m, 1H), 2.03-1.98 (m, 1H), 1.63-1.58 (m, 2H), 1.26-1.18 (m, 2H), 1.14 (s, 9H);  $^{13}\text{C}$  NMR (150 MHz,  $\text{CDCl}_3$ , ppm)  $\delta$  208.6, 197.4, 171.3, 171.2, 144.2, 132.6, 129.2, 129.1, 81.5, 80.8, 55.9, 52.6, 52.5, 43.2, 33.3, 32.8, 29.9, 26.4, 23.8, 23.7, 21.7; HRMS (ESI) calcd for  $\text{C}_{25}\text{H}_{36}\text{O}_8\text{Na}$  ( $\text{M}+\text{Na}$ ) $^+$ : 487.2302; found: 487.2305.

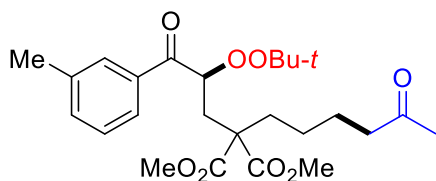

**Dimethyl 2-(2-(*tert*-butylperoxy)-3-oxo-3-(*m*-tolyl)propyl)-2-(5-oxohexyl)malonate (3e):** Isolated by flash column chromatography (ethyl acetate/petroleum ether = 3:1,  $R_f = 0.4$ ) in 61% yield (28.2 mg); Colorless oil;  $^1\text{H}$  NMR (600 MHz,  $\text{CDCl}_3$ , ppm)  $\delta$  7.86 (d,  $J = 6.9$  Hz, 2H), 7.40-7.34 (m, 2H) 5.15 (t,  $J = 6.3$  Hz, 1H), 3.72 (s, 3H), 3.71 (s, 3H), 2.45-2.42 (m, 7H), 2.13 (s, 3H), 2.12-2.07 (m, 1H), 2.04-1.99 (m, 1H), 1.63-1.58 (m, 2H), 1.27-1.21 (m, 2H), 1.14 (s, 9H);  $^{13}\text{C}$  NMR (150 MHz,  $\text{CDCl}_3$ , ppm)  $\delta$  208.5, 198.0, 171.3, 171.2, 138.2, 135.2, 134.1, 129.5, 128.3, 126.2, 81.5, 80.8, 55.9, 52.6, 52.5, 43.2, 33.2, 32.7, 29.9, 26.4, 23.8, 21.4; HRMS (ESI) calcd for  $\text{C}_{25}\text{H}_{36}\text{O}_8\text{Na}$  ( $\text{M}+\text{Na}$ ) $^+$ : 487.2302; found: 487.2304.

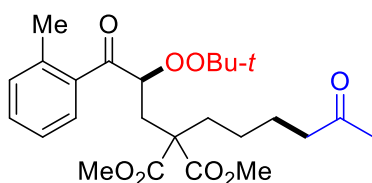

**Dimethyl 2-(2-(*tert*-butylperoxy)-3-oxo-3-(*o*-tolyl)propyl)-2-(5-oxohexyl)malonate (3f):** Isolated by flash column chromatography (ethyl acetate/petroleum ether = 3:1,  $R_f = 0.4$ ) in 64% yield (29.5 mg); Colorless oil;  $^1\text{H}$  NMR (600 MHz,  $\text{CDCl}_3$ , ppm)  $\delta$  7.67 (d,  $J = 7.2$  Hz, 1H), 7.38-7.36 (m, 1H), 7.27-7.24 (m, 2H), 5.03 (dd,  $J = 9.0, 2.9$  Hz, 1H), 3.71 (s, 3H), 3.66 (s, 3H), 2.46 (s, 3H), 2.44-2.33 (m, 4H), 2.12 (s, 3H), 2.09-2.04 (m, 1H), 2.02-1.97 (m, 1H), 1.61-1.55 (m, 2H), 1.24-1.20 (m, 1H), 1.09 (s, 9H), 1.08-1.03 (m, 1H);  $^{13}\text{C}$  NMR (150 MHz,  $\text{CDCl}_3$ , ppm)  $\delta$  208.5, 202.1, 171.3, 171.2, 138.6, 136.4, 131.7, 131.2, 128.4, 125.3, 82.0, 80.6, 56.0, 52.6, 52.5, 43.2, 32.6, 32.5, 29.9, 26.3, 23.8, 23.7, 20.7; HRMS (ESI) calcd for  $\text{C}_{25}\text{H}_{36}\text{O}_8\text{Na}$  ( $\text{M}+\text{Na}$ ) $^+$ : 487.2302; found: 487.2303.

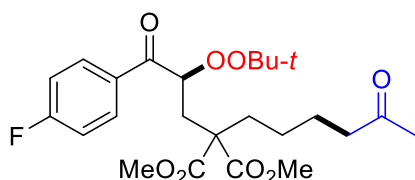

**Dimethyl 2-(2-(*tert*-butylperoxy)-3-(4-fluorophenyl)-3-oxopropyl)-2-(5-oxohexyl)malonate (3g):** Isolated by flash column chromatography (ethyl acetate/petroleum ether = 3:1,  $R_f = 0.4$ ) in 63% yield

(29.3 mg); Colorless oil;  $^1\text{H}$  NMR (600 MHz,  $\text{CDCl}_3$ , ppm)  $\delta$  8.15-8.13 (m, 2H), 7.15 (t,  $J = 8.5$  Hz, 2H), 5.09 (t,  $J = 6.5$  Hz, 1H), 3.73 (s, 3H), 3.72 (s, 3H), 2.46-2.42 (m, 4H), 2.14 (s, 3H), 2.11-2.05 (m, 1H), 2.03-1.98 (m, 1H), 1.63-1.58 (m, 2H), 1.26-1.19 (m, 2H), 1.13 (s, 9H);  $^{13}\text{C}$  NMR (150 MHz,  $\text{CDCl}_3$ , ppm)  $\delta$  208.5, 196.4, 171.3, 165.8 (d,  $J = 253.6$  Hz), 131.8 (d,  $J = 9.1$  Hz), 131.5 (d,  $J = 2.9$  Hz), 115.6 (d,  $J = 21.6$  Hz), 82.0, 80.9, 55.9, 52.7, 52.6, 43.2, 33.2, 32.8, 29.9, 26.4, 23.7;  $^{19}\text{F}$  NMR (564 MHz,  $\text{CDCl}_3$ , ppm)  $\delta$  -104.62 (s, 1F); HRMS (ESI) calcd for  $\text{C}_{24}\text{H}_{33}\text{FO}_8\text{Na}$  ( $\text{M}+\text{Na}$ ) $^+$ : 491.2052; found: 491.2054.

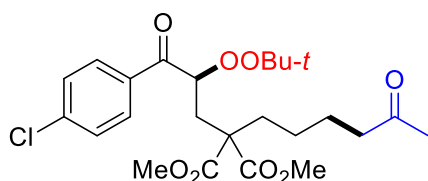

**Dimethyl 2-(2-(*tert*-butylperoxy)-3-(4-chlorophenyl)-3-oxopropyl)-2-(5-oxohexyl)malonate (3h):**

Isolated by flash column chromatography (ethyl acetate/petroleum ether = 3:1,  $R_f = 0.4$ ) in 61% yield (29.5 mg); Colorless oil;  $^1\text{H}$  NMR (600 MHz,  $\text{CDCl}_3$ , ppm)  $\delta$  8.04 (d,  $J = 8.5$  Hz, 2H), 7.45 (d,  $J = 8.5$  Hz, 2H), 5.08 (dd,  $J = 7.2, 5.4$  Hz, 1H), 3.72 (s, 3H), 3.72 (s, 3H), 2.46-2.41 (m, 4H), 2.14 (s, 3H), 2.10-2.05 (m, 1H), 2.03-1.98 (m, 1H), 1.63-1.58 (m, 2H), 1.25-1.18 (m, 2H), 1.12 (s, 9H);  $^{13}\text{C}$  NMR (150 MHz,  $\text{CDCl}_3$ , ppm)  $\delta$  208.5, 196.8, 171.2, 139.7, 133.4, 130.6, 128.8, 82.1, 81.0, 55.8, 52.7, 52.6, 43.2, 33.2, 32.8, 29.9, 26.4, 23.7; HRMS (ESI) calcd for  $\text{C}_{24}\text{H}_{33}\text{ClO}_8\text{Na}$  ( $\text{M}+\text{Na}$ ) $^+$ : 507.1756; found: 507.1759.

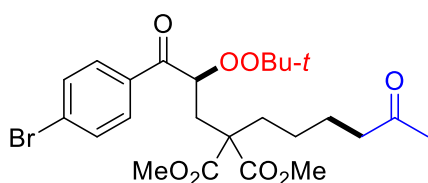

**Dimethyl 2-(3-(4-bromophenyl)-2-(*tert*-butylperoxy)-3-oxopropyl)-2-(5-oxohexyl)malonate (3i):**

Isolated by flash column chromatography (ethyl acetate/petroleum ether = 5:1,  $R_f = 0.4$ ) in 58% yield (30.4 mg); Colorless oil;  $^1\text{H}$  NMR (600 MHz,  $\text{CDCl}_3$ , ppm)  $\delta$  7.97 (d,  $J = 8.6$  Hz, 2H), 7.62 (d,  $J = 8.6$  Hz, 2H), 5.07 (dd,  $J = 7.4, 5.3$  Hz, 1H), 3.72 (s, 3H), 3.72 (s, 3H), 2.46-2.41 (m, 4H), 2.14 (s, 3H), 2.10-2.05 (m, 1H), 2.03-1.97 (m, 1H), 1.63-1.58 (m, 2H), 1.26-1.18 (m, 2H), 1.12 (s, 9H);  $^{13}\text{C}$  NMR (150 MHz,  $\text{CDCl}_3$ , ppm)  $\delta$  208.5, 197.0, 171.2, 133.8, 131.8, 130.7, 128.5, 82.1, 81.0, 55.8, 52.7, 52.6, 43.2, 33.2, 32.8, 30.0, 26.4, 23.7; HRMS (ESI) calcd for  $\text{C}_{24}\text{H}_{33}\text{BrO}_8\text{Na}$  ( $\text{M}+\text{Na}$ ) $^+$ :

551.1251; found: 551.1254.

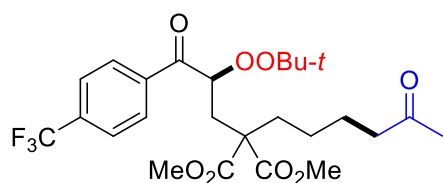

**Dimethyl 2-(2-(*tert*-butylperoxy)-3-oxo-3-(4-(trifluoromethyl)phenyl)propyl)-2-(5-oxohexyl)**

**malonate (3j):** Isolated by flash column chromatography (ethyl acetate/petroleum ether = 3:1,  $R_f$  = 0.4) in 59% yield (30.7 mg); Colorless oil;  $^1\text{H}$  NMR (600 MHz,  $\text{CDCl}_3$ , ppm)  $\delta$  8.21 (d,  $J$  = 8.2 Hz, 2H), 7.74 (d,  $J$  = 8.2 Hz, 2H), 5.11 (dd,  $J$  = 8.1, 4.4 Hz, 1H), 3.73 (s, 3H), 3.72 (s, 3H), 2.47-2.40 (m, 4H), 2.14 (s, 3H), 2.11-2.05 (m, 1H), 2.04-1.99 (m, 1H), 1.64-1.59 (m, 2H), 1.26-1.20 (m, 2H), 1.12 (s, 9H);  $^{13}\text{C}$  NMR (150 MHz,  $\text{CDCl}_3$ , ppm)  $\delta$  208.4, 197.2, 171.2, 137.9, 134.4 (q,  $J$  = 32.6 Hz), 129.4, 125.5 (q,  $J$  = 3.5 Hz), 123.6 (q,  $J$  = 270.6 Hz), 82.3, 81.1, 55.8, 52.7, 52.6, 43.1, 33.1, 32.8, 29.9, 26.3, 23.8, 23.7;  $^{19}\text{F}$  NMR (564 MHz,  $\text{CDCl}_3$ , ppm)  $\delta$  -63.18 (s, 3F); HRMS (ESI) calcd for  $\text{C}_{25}\text{H}_{33}\text{F}_3\text{O}_8\text{Na}$  ( $\text{M}+\text{Na}$ ) $^+$ : 541.2020; found: 541.2022.

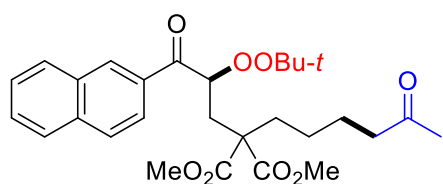

**Dimethyl 2-(2-(*tert*-butylperoxy)-3-(naphthalen-2-yl)-3-oxopropyl)-2-(5-oxohexyl)malonate (3k):**

Isolated by flash column chromatography (ethyl acetate/petroleum ether = 3:1,  $R_f$  = 0.4) in 30% yield (14.9 mg); Colorless oil;  $^1\text{H}$  NMR (600 MHz,  $\text{CDCl}_3$ , ppm)  $\delta$  8.68 (s, 1H), 8.10-8.08 (m, 1H), 7.99 (d,  $J$  = 8.1 Hz, 1H), 7.91-7.88 (m, 2H), 7.63-7.60 (m, 1H), 7.57-7.55 (m, 1H), 5.29 (dd,  $J$  = 7.2, 5.4 Hz, 1H), 3.74 (s, 3H), 3.72 (s, 3H), 2.54-2.48 (m, 2H), 2.44 (t,  $J$  = 7.4 Hz, 2H), 2.16-2.09 (m, 4H), 2.07-2.02 (m, 1H), 1.64-1.59 (m, 2H), 1.27-1.22 (m, 2H), 1.14 (s, 9H);  $^{13}\text{C}$  NMR (150 MHz,  $\text{CDCl}_3$ , ppm)  $\delta$  208.5, 197.8, 171.4, 171.3, 135.7, 132.5, 132.4, 131.0, 129.8, 128.6, 128.3, 127.8, 126.7, 124.6, 81.7, 80.9, 56.0, 52.7, 52.6, 43.2, 33.4, 32.8, 29.9, 26.4, 23.8; HRMS (ESI) calcd for  $\text{C}_{28}\text{H}_{36}\text{O}_8\text{Na}$  ( $\text{M}+\text{Na}$ ) $^+$ : 523.2302; found: 523.2304.



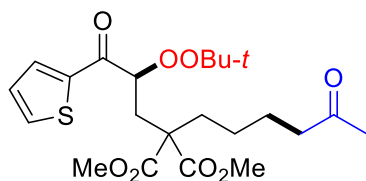

**Dimethyl 2-(2-(tert-butylperoxy)-3-oxo-3-(thiophen-2-yl)propyl)-2-(5-oxohexyl)malonate (3l):**

Isolated by flash column chromatography (ethyl acetate/petroleum ether = 3:1,  $R_f = 0.5$ ) in 32% yield (14.7 mg); Colorless oil;  $^1\text{H NMR}$  (600 MHz,  $\text{CDCl}_3$ , ppm)  $\delta$  8.01-8.00 (m, 1H), 7.69-7.68 (m, 1H), 7.17-7.15 (m, 1H), 4.88 (dd,  $J = 9.4, 3.6$  Hz, 1H), 3.75 (s, 3H), 3.72 (s, 3H), 2.49-2.39 (m, 4H), 2.14 (s, 3H), 2.13-2.08 (m, 1H), 2.03-1.98 (m, 1H), 1.62-1.59 (m, 2H), 1.28-1.20 (m, 2H), 1.18 (s, 9H);  $^{13}\text{C NMR}$  (150 MHz,  $\text{CDCl}_3$ , ppm)  $\delta$  208.6, 191.4, 171.2, 171.1, 140.7, 134.2, 133.7, 128.0, 83.3, 81.2, 55.8, 52.7, 52.6, 43.3, 33.8, 32.4, 29.9, 26.4, 23.8, 23.7; HRMS (ESI) calcd for  $\text{C}_{22}\text{H}_{32}\text{O}_8\text{Na}$  ( $\text{M}+\text{Na}$ ) $^+$ : 479.1710; found: 479.1708.

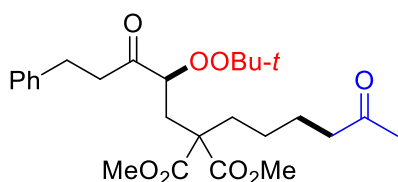

**Dimethyl 2-(2-(tert-butylperoxy)-3-oxo-5-phenylpentyl)-2-(5-oxohexyl)malonate (3m):**

Isolated by flash column chromatography (ethyl acetate/petroleum ether = 3:1,  $R_f = 0.4$ ) in 54% yield (25.8 mg); Colorless oil;  $^1\text{H NMR}$  (600 MHz,  $\text{CDCl}_3$ , ppm)  $\delta$  7.28 (t,  $J = 7.6$  Hz, 2H), 7.22-7.18 (m, 3H), 4.25 (dd,  $J = 7.2, 5.8$  Hz, 1H), 3.72 (s, 3H), 3.71 (s, 3H), 3.11-3.04 (m, 1H), 2.95-2.87 (m, 3H), 2.44 (t,  $J = 7.3$  Hz, 2H), 2.15 (d,  $J = 5.8$  Hz, 2H), 2.13 (s, 3H), 2.06-2.00 (m, 1H), 1.96-1.91 (m, 1H), 1.61-1.56 (m, 2H), 1.19 (s, 9H), 1.15-1.11 (m, 2H);  $^{13}\text{C NMR}$  (150 MHz,  $\text{CDCl}_3$ , ppm)  $\delta$  210.2, 208.5, 171.1, 171.0, 141.3, 128.4, 128.3, 126.0, 84.6, 81.1, 55.6, 52.8, 52.6, 43.2, 38.7, 32.5, 32.1, 29.9, 29.2, 26.4, 23.8, 23.6; HRMS (ESI) calcd for  $\text{C}_{26}\text{H}_{38}\text{O}_8\text{Na}$  ( $\text{M}+\text{Na}$ ) $^+$ : 501.2459; found: 501.2456.

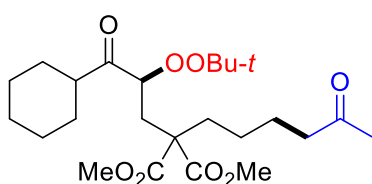

**Dimethyl 2-(2-(tert-butylperoxy)-3-cyclohexyl-3-oxopropyl)-2-(5-oxohexyl)malonate (3n):**

Isolated by flash column chromatography (ethyl acetate/petroleum ether = 4:1,  $R_f = 0.3$ ) in 56% yield (25.4 mg); Colorless oil;  $^1\text{H}$  NMR (600 MHz,  $\text{CDCl}_3$ , ppm)  $\delta$  4.34 (dd,  $J = 8.4, 4.1$  Hz, 1H), 3.74 (s, 3H), 3.72 (s, 3H), 2.88-2.84 (m, 1H), 2.44 (t,  $J = 7.4$  Hz, 2H), 2.24-2.18 (m, 2H), 2.13 (s, 3H), 2.06-2.01 (m, 1H), 1.97-1.92 (m, 1H), 1.85-1.78 (m, 4H), 1.62-1.57 (m, 2H), 1.41-1.25 (m, 6H), 1.20 (s, 9H), 1.18-1.09 (m, 2H);  $^{13}\text{C}$  NMR (150 MHz,  $\text{CDCl}_3$ , ppm)  $\delta$  213.6, 208.5, 171.3, 171.2, 83.3, 80.8, 55.8, 52.7, 52.6, 45.7, 43.2, 32.5, 29.9, 29.4, 28.2, 26.4, 25.8, 25.5, 23.8, 23.7; HRMS (ESI) calcd for  $\text{C}_{24}\text{H}_{40}\text{O}_8\text{Na}$  ( $\text{M}+\text{Na}$ ) $^+$ : 479.2615; found: 479.2613.

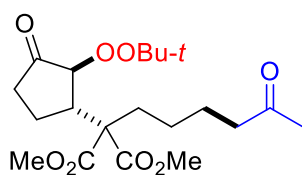

**Dimethyl 2-((2R)-2-(tert-butylperoxy)-3-oxocyclopentyl)-2-(5-oxohexyl)malonate (3o):** Isolated by flash column chromatography (ethyl acetate/petroleum ether = 5:1,  $R_f = 0.4$ ) in 41% yield (16.3 mg); Colorless oil (dr > 20:1);  $^1\text{H}$  NMR (600 MHz,  $\text{CDCl}_3$ , ppm)  $\delta$  4.26 (d,  $J = 7.9$  Hz, 1H), 3.74 (s, 3H), 3.72 (s, 3H), 3.10-3.06 (m, 1H), 2.44 (t,  $J = 7.3$  Hz, 2H), 2.30-2.26 (m, 3H), 2.13 (s, 3H), 2.07-1.97 (m, 2H), 1.66-1.50 (m, 5H), 1.21 (s, 9H);  $^{13}\text{C}$  NMR (150 MHz,  $\text{CDCl}_3$ , ppm)  $\delta$  212.5, 208.6, 171.1, 171.0, 84.9, 80.6, 60.0, 52.3, 52.2, 43.3, 42.4, 36.5, 34.4, 29.9, 26.4, 24.3, 23.9, 21.0; HRMS (ESI) calcd for  $\text{C}_{20}\text{H}_{32}\text{O}_8\text{Na}$  ( $\text{M}+\text{Na}$ ) $^+$ : 423.1989; found: 499.1988.

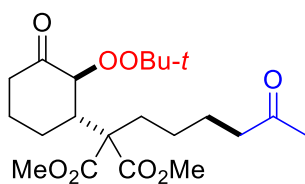

**Dimethyl 2-((1S)-2-(tert-butylperoxy)-3-oxocyclohexyl)-2-(5-oxohexyl)malonate (3p):** Isolated by flash column chromatography (ethyl acetate/petroleum ether = 5:1,  $R_f = 0.4$ ) in 46% yield (18.9 mg); Colorless oil (dr > 20:1);  $^1\text{H}$  NMR (600 MHz,  $\text{CDCl}_3$ , ppm)  $\delta$  4.27 (d,  $J = 4.6$  Hz, 1H), 3.65 (s, 3H), 3.63 (s, 3H), 2.55-2.51 (m, 1H), 2.45-2.42 (m, 1H), 2.37 (t,  $J = 7.3$  Hz, 2H), 2.17-2.12 (m, 1H), 2.06 (s, 3H), 1.90-1.78 (m, 5H), 1.52-1.47 (m, 2H), 1.34-1.29 (m, 1H), 1.28-1.20 (m, 2H), 1.17 (s, 9H);  $^{13}\text{C}$  NMR (150 MHz,  $\text{CDCl}_3$ , ppm)  $\delta$  208.6, 207.5, 170.7, 170.6, 86.3, 80.9, 60.2, 52.3, 52.0, 45.9, 43.2, 38.0, 34.3, 29.9, 26.4, 24.4, 24.1, 23.9, 21.6; HRMS (ESI) calcd for  $\text{C}_{21}\text{H}_{34}\text{O}_8\text{Na}$  ( $\text{M}+\text{Na}$ ) $^+$ : 437.2146; found: 437.2143.

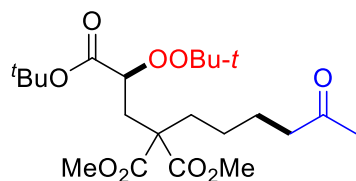

**1-(tert-butyl) 3,3-dimethyl 1-(tert-butylperoxy)-8-oxononane-1,3,3-tricarboxylate (3q):** Isolated by flash column chromatography (ethyl acetate/petroleum ether = 5:1,  $R_f = 0.35$ ) in 57% yield (25.3 mg); Colorless oil;  $^1\text{H}$  NMR (600 MHz,  $\text{CDCl}_3$ , ppm)  $\delta$  4.23 (t,  $J = 6.3$  Hz, 1H), 3.73 (s, 6H), 2.45 (t,  $J = 7.4$  Hz, 2H), 2.29 (d,  $J = 6.4$  Hz, 2H), 2.13 (s, 3H), 2.07-2.01 (m, 1H), 1.98-1.93 (m, 1H), 1.62-1.57 (m, 2H), 1.48 (s, 9H), 1.44 (d,  $J = 4.6$  Hz, 2H), 1.21 (s, 9H);  $^{13}\text{C}$  NMR (150 MHz,  $\text{CDCl}_3$ , ppm)  $\delta$  208.5, 171.3, 171.2, 170.4, 81.5, 80.6, 79.2, 55.7, 52.7, 52.5, 43.3, 33.0, 32.1, 29.9, 28.0, 26.4, 23.8, 23.6; HRMS (ESI) calcd for  $\text{C}_{22}\text{H}_{38}\text{O}_9\text{Na}$  ( $\text{M}+\text{Na}$ ) $^+$ : 469.2408; found: 469.2405.

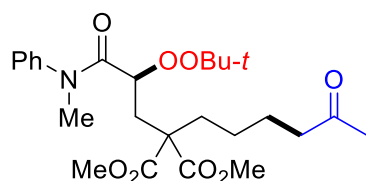

**Dimethyl 2-(2-(tert-butylperoxy)-3-(methyl(phenyl)amino)-3-oxopropyl)-2-(5-oxohexyl)malonate (3r):** Isolated by flash column chromatography (ethyl acetate/petroleum ether = 3:1,  $R_f = 0.3$ ) in 33% yield (16.0 mg); Colorless oil;  $^1\text{H}$  NMR (600 MHz,  $\text{CDCl}_3$ , ppm)  $\delta$  7.43 (t,  $J = 7.6$  Hz, 2H), 7.35 (t,  $J = 7.4$  Hz, 1H), 7.26 (d,  $J = 7.4$  Hz, 2H), 4.47 (dd,  $J = 10.5, 2.8$  Hz, 1H), 3.66 (s, 3H), 3.55 (s, 3H), 3.30 (s, 3H), 2.47-2.43 (m, 1H), 2.30 (t,  $J = 7.5$  Hz, 2H), 2.18-2.15 (m, 1H), 2.11 (s, 3H), 1.89-1.84 (m, 1H), 1.62-1.57 (m, 1H), 1.39-1.34 (m, 2H), 1.17 (s, 9H), 1.04-0.99 (m, 1H), 0.80-0.73 (m, 1H);  $^{13}\text{C}$  NMR (150 MHz,  $\text{CDCl}_3$ , ppm)  $\delta$  208.5, 171.2, 170.2, 143.1, 129.6, 128.0, 127.9, 80.9, 75.6, 55.4, 52.5, 52.4, 43.2, 38.0, 33.4, 32.1, 29.9, 26.4, 23.6, 23.5; HRMS (ESI) calcd for  $\text{C}_{25}\text{H}_{38}\text{NO}_8$  ( $\text{M}+\text{H}$ ) $^+$ : 480.2592; found: 480.2589.

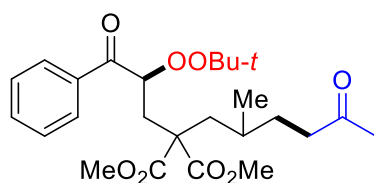

**Dimethyl 2-(2-(tert-butylperoxy)-3-oxo-3-phenylpropyl)-2-(2-methyl-5-oxohexyl)malonate (3s):** Isolated by flash column chromatography (ethyl acetate/petroleum ether = 3:1,  $R_f = 0.4$ ) in 58% yield

(27.1 mg); Colorless oil (dr = 1:1);  $^1\text{H}$  NMR (600 MHz,  $\text{CDCl}_3$ , ppm)  $\delta$  8.07 (d,  $J = 7.6$  Hz, 2H), 7.58 (t,  $J = 7.4$  Hz, 1H), 7.47 (d,  $J = 7.6$  Hz, 2H), 5.19 (dd,  $J = 8.8, 3.7$  Hz, 0.5H), 5.12 (dd,  $J = 8.8, 3.8$  Hz, 0.5H), 3.71 (s, 3H), 3.70 (s, 3H), 2.53-2.38 (m, 4H), 2.18-2.13 (m, 4H), 1.99-1.88 (m, 1H), 1.60-1.51 (m, 2H), 1.46-1.38 (m, 1H), 1.12 (d,  $J = 2.4$  Hz, 9H), 0.83 (d,  $J = 5.6$  Hz, 3H);  $^{13}\text{C}$  NMR (150 MHz,  $\text{CDCl}_3$ , ppm)  $\delta$  208.7, 208.6, 198.0, 197.9, 171.8, 171.7, 171.5, 171.4, 135.3, 135.2, 133.3, 129.1, 129.0, 128.5, 81.9, 81.6, 80.9, 80.8, 55.1, 55.0, 52.6, 52.5, 52.4, 41.0, 40.1, 39.7, 33.8, 33.6, 31.6, 31.4, 30.0, 29.9, 28.4, 28.3, 26.4, 20.0, 19.9; HRMS (ESI) calcd for  $\text{C}_{25}\text{H}_{36}\text{O}_8\text{Na}$  ( $\text{M}+\text{Na}$ ) $^+$ : 487.2302; found: 487.2299.

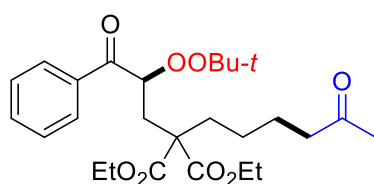

**Diethyl 2-(2-(tert-butylperoxy)-3-oxo-3-phenylpropyl)-2-(5-oxohexyl)malonate (3t):** Isolated by flash column chromatography (ethyl acetate/petroleum ether = 5:1,  $R_f = 0.4$ ) in 61% yield (29.0 mg); Colorless oil;  $^1\text{H}$  NMR (600 MHz,  $\text{CDCl}_3$ , ppm)  $\delta$  8.07 (d,  $J = 7.4$  Hz, 2H), 7.57 (t,  $J = 7.4$  Hz, 1H), 7.46 (t,  $J = 7.7$  Hz, 2H), 5.14 (t,  $J = 6.1$  Hz, 1H), 4.22-2.14 (m, 7H), 2.45-2.42 (m, 4H), 2.13 (s, 3H), 2.12-2.06 (m, 1H), 2.04-1.99 (m, 1H), 1.63-1.58 (m, 2H), 1.26-1.21 (m, 8H), 1.13 (s, 9H);  $^{13}\text{C}$  NMR (150 MHz,  $\text{CDCl}_3$ , ppm)  $\delta$  208.6, 198.0, 170.9, 170.8, 135.2, 133.2, 129.1, 128.5, 81.9, 80.8, 61.6, 61.4, 55.9, 43.3, 33.0, 32.5, 29.9, 26.4, 23.9, 23.7, 14.0; HRMS (ESI) calcd for  $\text{C}_{26}\text{H}_{38}\text{O}_7\text{Na}$  ( $\text{M}+\text{Na}$ ) $^+$ : 501.2459; found: 501.2460.

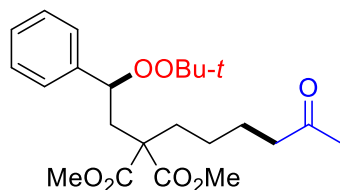

**Dimethyl 2-(2-(tert-butylperoxy)-2-phenylethyl)-2-(5-oxohexyl)malonate (3u):** Isolated by flash column chromatography (ethyl acetate/petroleum ether = 5:1,  $R_f = 0.3$ ) in 58% yield (24.6 mg); Colorless oil;  $^1\text{H}$  NMR (600 MHz,  $\text{CDCl}_3$ , ppm)  $\delta$  7.34-7.28 (m, 5H), 4.81 (dd,  $J = 8.0, 5.0$  Hz, 1H), 3.71 (s, 3H), 3.55 (s, 3H), 2.58-2.54 (m, 1H), 2.41 (t,  $J = 7.4$  Hz, 1H), 2.34-2.31 (m, 1H), 2.13 (s, 3H), 2.08-2.05 (m, 1H), 2.02-1.99 (m, 1H), 1.60-1.55 (m, 2H), 1.24-1.20 (m, 2H), 1.11 (s, 9H);  $^{13}\text{C}$  NMR (150 MHz,  $\text{CDCl}_3$ , ppm)  $\delta$  208.6, 171.6, 171.5, 141.1, 128.1, 127.9, 127.3, 81.9, 80.0, 55.9,

52.5, 52.4, 43.3, 37.3, 32.1, 29.9, 26.5, 23.8, 23.7; HRMS (ESI) calcd for C<sub>23</sub>H<sub>34</sub>O<sub>7</sub>Na (M+Na)<sup>+</sup>: 445.2197; found: 445.2195.

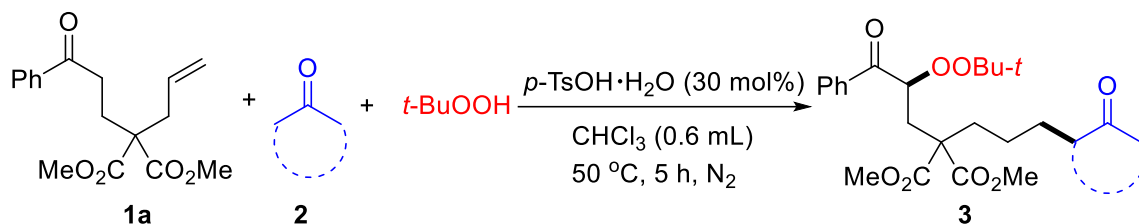

To a 10 mL sealable pressure tube was added unactivated alkenes **1** (0.1 mmol), *p*-TsOH·H<sub>2</sub>O (0.03 mmol), CH<sub>3</sub>Cl (0.6 mL) and *t*-BuOOH (5.5 M in decane, 0.5 mmol) under N<sub>2</sub> atmosphere at room temperature, and the resulting solution was stirred at 50 °C for 5 h. The resulting mixture and the solvent were evaporated under vacuum. The residue was purified by flash column chromatography on silica gel (eluent: ethyl acetate/petroleum ether) to give the peroxides **3v-3x**.

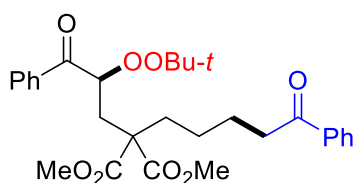

**Dimethyl 2-(2-(tert-butylperoxy)-3-oxo-3-phenylpropyl)-2-(5-oxo-5-phenylpentyl)malonate (3v):**

Isolated by flash column chromatography (ethyl acetate/petroleum ether = 4:1, *R<sub>f</sub>* = 0.3) in 28% yield (14.3 mg); Colorless oil; <sup>1</sup>H NMR (600 MHz, CDCl<sub>3</sub>, ppm) δ 8.36 (d, *J* = 7.3 Hz, 2H), 7.95 (d, *J* = 7.3 Hz, 2H), 7.58-7.55 (m, 2H), 7.48-7.45 (m, 4H), 5.19 (dd, *J* = 7.5, 5.0 Hz, 1H), 3.72 (s, 3H), 3.71 (s, 3H), 2.99 (t, *J* = 7.3 Hz, 2H), 2.48-2.42 (m, 2H), 2.18-2.13 (m, 1H), 2.11-2.05 (m, 1H), 1.81-1.76 (m, 2H), 1.39-1.33 (m, 1H), 1.31-1.23 (m, 1H), 1.13 (s, 9H); <sup>13</sup>C NMR (150 MHz, CDCl<sub>3</sub>, ppm) δ 199.8, 197.9, 171.4, 171.3, 137.0, 135.3, 133.3, 133.0, 129.1, 128.6, 128.5, 128.1, 81.6, 80.9, 56.0, 52.7, 52.6, 38.2, 33.2, 32.9, 26.4, 24.3, 24.0; HRMS (ESI) calcd for C<sub>29</sub>H<sub>36</sub>O<sub>8</sub>Na (M+Na)<sup>+</sup>: 535.2302; found: 535.2303.

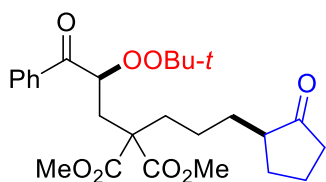

**Dimethyl 2-(2-(tert-butylperoxy)-3-oxo-3-phenylpropyl)-2-(3-(2-oxocyclopentyl)propyl)malonate (3w):**

Isolated by flash column chromatography (ethyl acetate/petroleum ether = 3:1, *R<sub>f</sub>* =

0.3) in 16% yield (7.6 mg); Colorless oil (dr = 1:1);  $^1\text{H}$  NMR (600 MHz,  $\text{CDCl}_3$ , ppm)  $\delta$  8.05 (d,  $J$  = 7.3 Hz, 2H), 7.56 (t,  $J$  = 7.4 Hz, 1H), 7.46 (t,  $J$  = 7.9 Hz, 2H), 5.17-5.14 (m, 1H), 3.71 (s, 3H), 3.70 (s, 3H), 2.43-2.41 (m, 2H), 2.31-2.27 (m, 1H), 2.22-2.17 (m, 1H), 2.12-2.05 (m, 2H), 2.04-1.97 (m, 3H), 1.80-1.72 (m, 2H), 1.50-1.43 (m, 1H), 1.30-1.19 (m, 3H), 1.11 (s, 9H);  $^{13}\text{C}$  NMR (150 MHz,  $\text{CDCl}_3$ , ppm)  $\delta$  221.0, 220.9, 197.9, 171.4, 171.3, 135.3, 135.2, 133.3, 129.1, 128.6, 81.6, 81.5, 80.9, 80.8, 56.0, 55.9, 52.7, 52.6, 48.9, 48.8, 38.2, 38.1, 33.3, 33.2, 32.9, 32.8, 29.9, 29.8, 29.7, 29.6, 26.4, 22.4, 22.3, 20.8; HRMS (ESI) calcd for  $\text{C}_{26}\text{H}_{36}\text{O}_8\text{Na}$  ( $\text{M}+\text{Na}$ ) $^+$ : 499.2302; found: 499.2303.

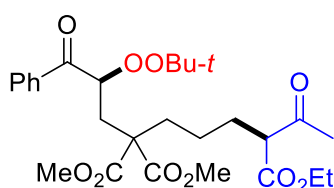

### 3-ethyl 7,7-dimethyl 9-(tert-butylperoxy)-2,10-dioxo-10-phenyldecane-3,7,7-tricarboxylate (**3x**):

Isolated by flash column chromatography (ethyl acetate/petroleum ether = 3:1,  $R_f$  = 0.3) in 40% yield (20.9 mg); Colorless oil (dr = 1:1);  $^1\text{H}$  NMR (600 MHz,  $\text{CDCl}_3$ , ppm)  $\delta$  8.06 (d,  $J$  = 7.5 Hz, 2H), 7.58 (t,  $J$  = 7.4 Hz, 1H), 7.47 (t,  $J$  = 7.9 Hz, 2H), 5.17-5.14 (m, 1H), 4.22-4.17 (m, 2H), 3.71 (s, 3H), 3.71 (s, 3H), 3.42 (t,  $J$  = 7.3 Hz, 1H), 2.42 (d,  $J$  = 6.0 Hz, 2H), 2.23 (d,  $J$  = 0.8 Hz, 3H), 2.11-2.07 (m, 1H), 2.05-2.01 (m, 1H), 1.90-1.85 (m, 2H), 1.30-1.22 (m, 5H), 1.12 (d,  $J$  = 0.5 Hz, 9H);  $^{13}\text{C}$  NMR (150 MHz,  $\text{CDCl}_3$ , ppm)  $\delta$  202.8, 197.9, 197.8, 171.2, 171.1, 169.6, 169.5, 135.3, 133.4, 129.1, 128.6, 81.5, 81.4, 61.5, 59.4, 59.3, 55.9, 52.7, 52.6, 33.2, 32.8, 32.7, 29.0, 28.9, 28.2, 26.5, 22.3, 22.2, 14.2; HRMS (ESI) calcd for  $\text{C}_{27}\text{H}_{38}\text{O}_{10}\text{Na}$  ( $\text{M}+\text{Na}$ ) $^+$ : 545.2357; found: 545.2361.

## 4. Large scale synthesis and transformation

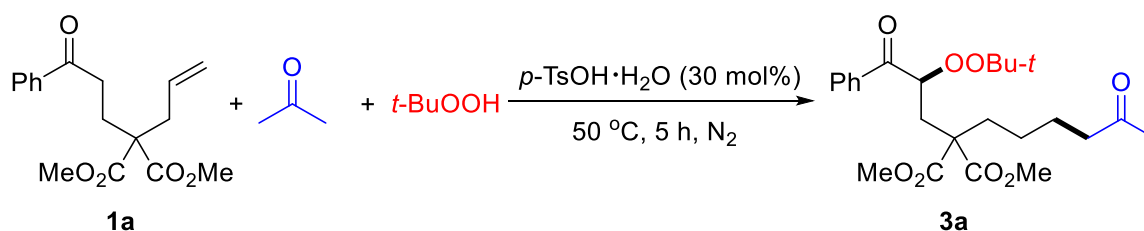

To a 25 mL sealable pressure tube was added unactivated alkenes **1a** (1 mmol),  $p$ -TsOH $\cdot$ H $_2$ O (0.03 mmol), acetone (6.0 mL) and  $t$ -BuOOH (5.5 M in decane, 0.5 mmol) under  $\text{N}_2$  atmosphere at room temperature, and the resulting solution was stirred at 50  $^\circ\text{C}$  for 5 h. The resulting mixture and the solvent were evaporated under vacuum. The residue was purified by flash column chromatography

on silica gel (eluent: ethyl acetate/petroleum ether =1/10-1/5) to give the peroxide **3a** in 57% yield (261 mg).

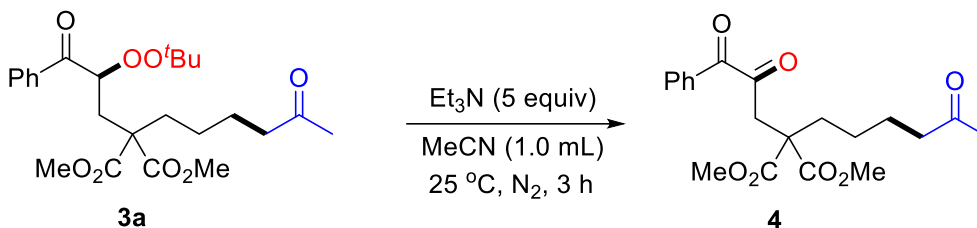

To a 25 mL Schlenk tube with a magnetic stir bar were added **3a** (45.0 mg, 0.1 mmol), Et<sub>3</sub>N (70.0 vL, 0.5 mmol) in MeCN (1.0 ml) and then allowed to stir at room temperature under N<sub>2</sub> atmosphere for 3 h. The resultant residue was purified by flash chromatography (ethyl acetate/petroleum ether = 1/8-1/5) to afford dimethyl 2-(2,3-dioxo-3-phenylpropyl)-2-(5-oxohexyl)malonate (**4**) (31.7 mg, 84% yield) as a yellow oil. <sup>1</sup>H NMR (600 MHz, CDCl<sub>3</sub>, ppm) δ 8.00 (d, *J* = 7.2 Hz, 2H), 7.64 (t, *J* = 7.4 Hz, 1H), 7.50 (t, *J* = 7.8 Hz, 2H), 3.76 (s, 6H), 3.48 (s, 2H), 2.44 (t, *J* = 7.3 Hz, 2H), 2.12 (s, 3H), 2.06 (t, *J* = 8.4 Hz, 2H), 1.61-1.56 (m, 2H), 1.31-1.26 (m, 2H); <sup>13</sup>C NMR (150 MHz, CDCl<sub>3</sub>, ppm) δ 208.4, 199.0, 190.9, 171.0, 134.6, 131.7, 130.5, 128.8, 56.0, 52.9, 43.1, 41.2, 34.1, 29.9, 24.2, 23.6; HRMS (ESI) calcd for C<sub>20</sub>H<sub>24</sub>O<sub>7</sub>Na (M+Na)<sup>+</sup>: 399.1414; found: 399.1405.

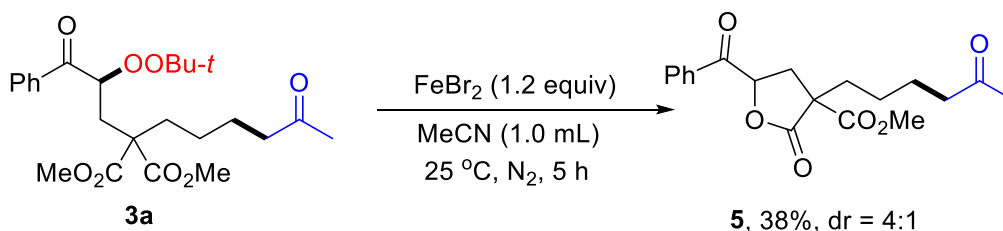

To a 25 mL Schlenk tube with a magnetic stir bar were added **3a** (90.0 mg, 0.2 mmol), FeBr<sub>2</sub> (51.8 mg, 0.24 mmol) in MeCN (1.0 ml) and then allowed to stir at room temperature under N<sub>2</sub> atmosphere for 5 h. The resultant residue was purified by flash chromatography (ethyl acetate/petroleum ether = 1/5-1/2) to afford compound **5** with 4 : 1 diastereomer (26.1 mg, 38%, yellow oil). <sup>1</sup>H NMR (600 MHz, CDCl<sub>3</sub>, ppm) δ 8.01 (d, *J* = 8.0 Hz, 2H), 7.65 (t, *J* = 7.4 Hz, 1H), 7.52 (t, *J* = 7.8 Hz, 2H), 5.73 (dd, *J* = 9.2, 7.2 Hz, 1H), 3.84 (s, 3H), 3.04-3.01 (m, 1H), 2.47-2.41 (m, 4H), 2.18-2.12 (m, 5H), 1.81-1.76 (m, 1H), 1.62-1.57 (m, 2H); <sup>13</sup>C NMR (150 MHz, CDCl<sub>3</sub>, ppm) δ 208.4, 194.0, 193.3, 172.8, 169.6, 169.4, 134.4, 134.1, 133.9, 129.0, 128.9, 128.8, 128.7, 76.9, 76.6, 55.2, 53.5, 42.9, 42.8, 34.0, 29.9, 24.2, 23.4, 23.3; HRMS (ESI) calcd for C<sub>19</sub>H<sub>22</sub>O<sub>6</sub>Na (M+Na)<sup>+</sup>: 369.1309; found: 369.1303.

## 5. Mechanistic studies

### (a) Control experiments

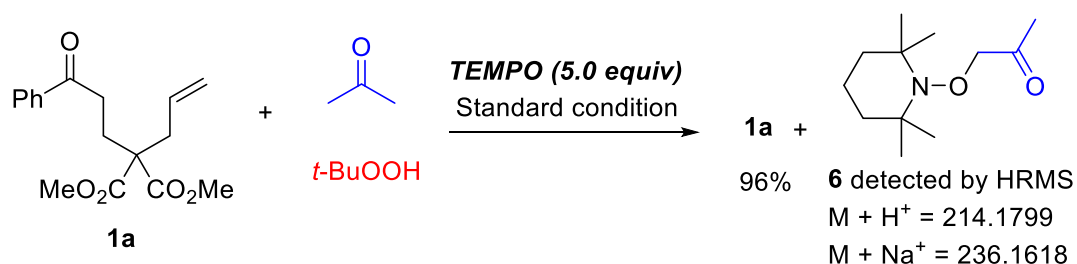

To a 10 mL sealable pressure tube was added unactivated alkenes **1a** (0.1 mmol), *p*-TsOH·H<sub>2</sub>O (0.03 mmol), TEMPO (78.1 mg, 0.5 mmol), acetone (0.6 mL) and *t*-BuOOH (5.5 M in decane, 0.5 mmol) under N<sub>2</sub> atmosphere at room temperature, and the resulting solution was stirred at 50 °C for 5 h. The model reaction was totally suppressed where alkene **1a** was almost fully recovered, and we can detect the molecular weight of compound **6** by HRMS (Figure 1).

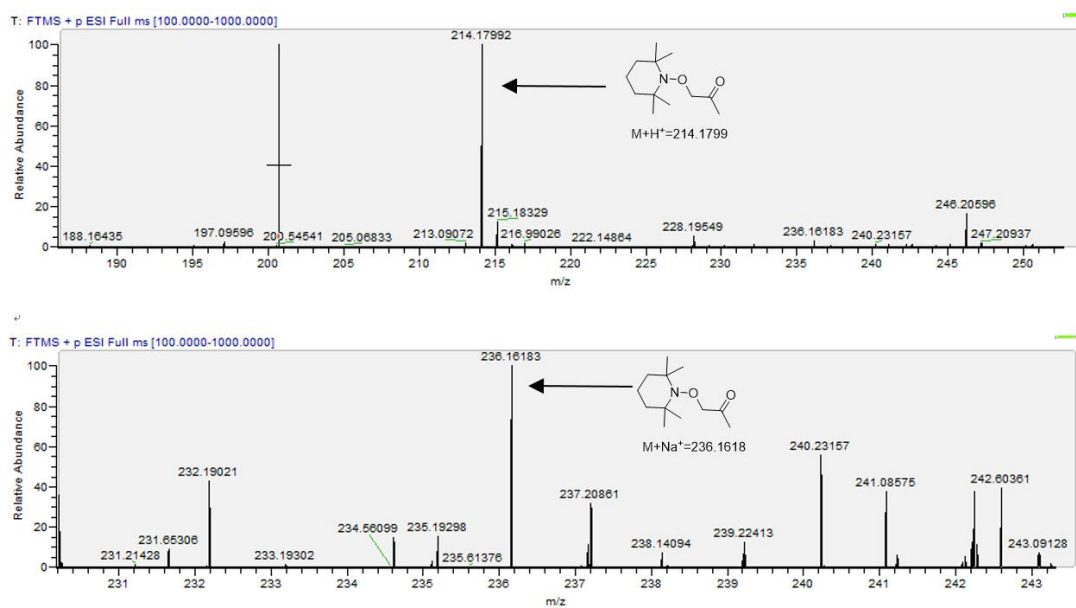

**Figure 1.** HRMS of the reaction solution



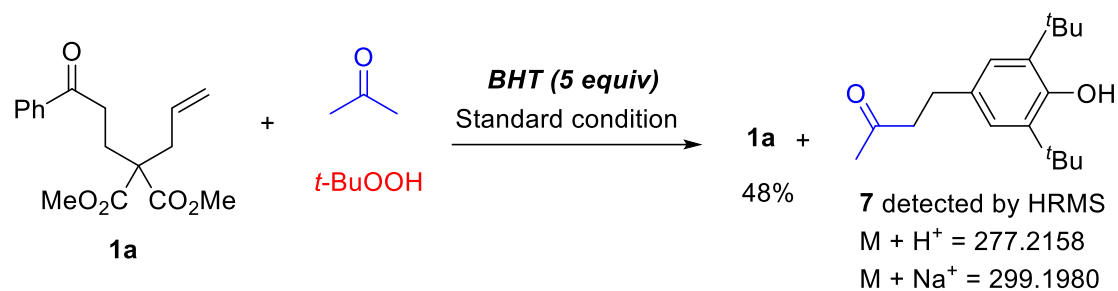

To a 10 mL sealable pressure tube was added unactivated alkenes **1a** (0.1 mmol), *p*-TsOH·H<sub>2</sub>O (0.03 mmol), BHT (110 mg, 0.5 mmol), acetone (0.6 mL) and *t*-BuOOH (5.5 M in decane, 0.5 mmol) under N<sub>2</sub> atmosphere at room temperature, and the resulting solution was stirred at 50 °C for 5 h. The model reaction was totally suppressed where alkene **1a** was almost fully recovered, and we can detect the molecular weight of compound **7** by HRMS (Figure 2).

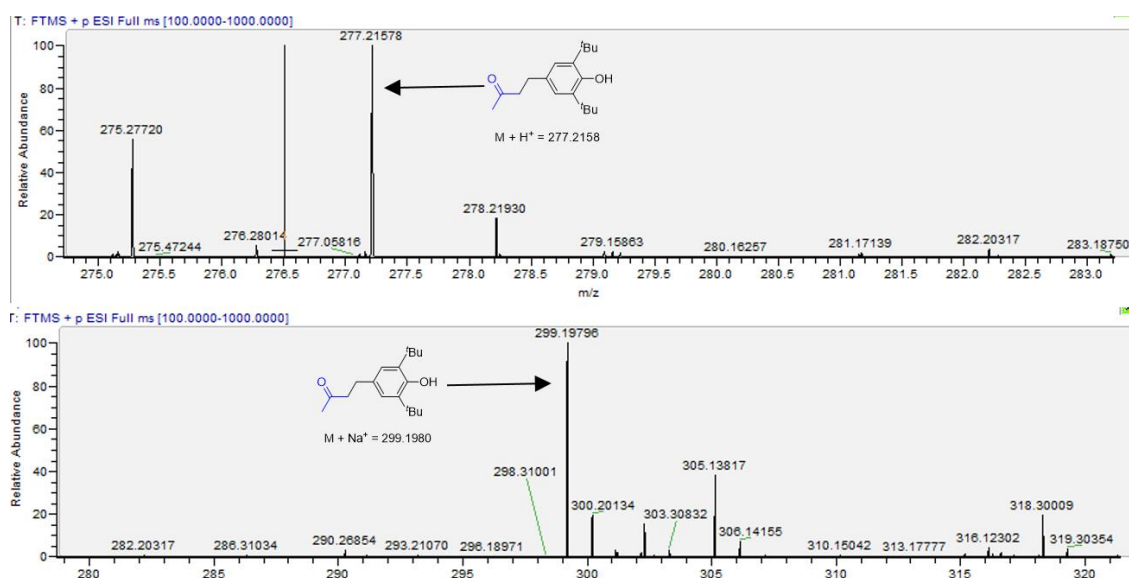

**Figure 2.** HRMS of the reaction solution

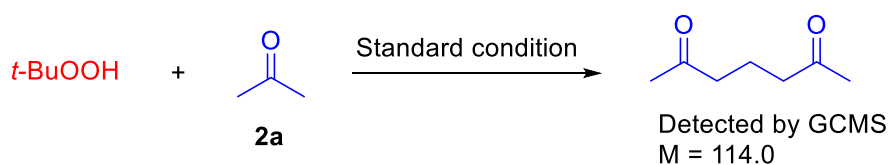

To a 10 mL sealable pressure tube was added *p*-TsOH·H<sub>2</sub>O (0.03 mmol), acetone (0.6 mL) and *t*-BuOOH (5.5 M in decane, 0.5 mmol) under N<sub>2</sub> atmosphere at room temperature, and the resulting solution was stirred at 50 °C for 5 h. We can detect the molecular weight of 2,5-hexadione by GC-MS. (Figure 3)

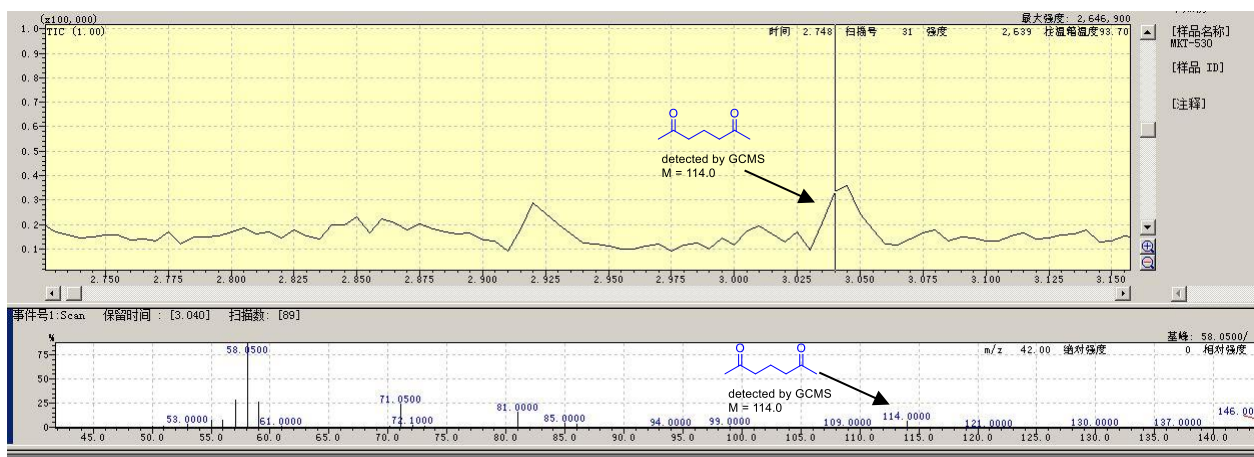

Figure 3. GC-MS of the reaction solution

(b) Kinetic isotope effect (KIE) experiment

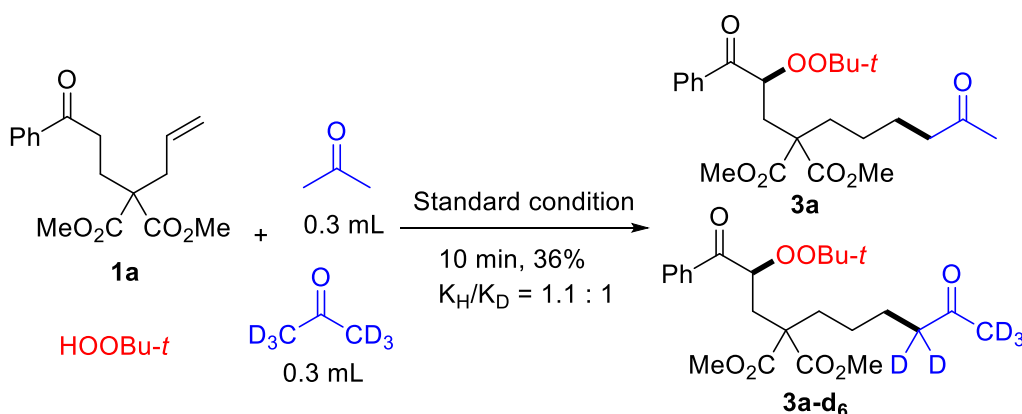

To a 10 mL sealable pressure tube was added unactivated alkenes **1a** (0.1 mmol), *p*-TsOH·H<sub>2</sub>O (0.03 mmol), acetone (0.3 mL), acetone-d<sub>6</sub> (0.3 mL) and *t*-BuOOH (5.5 M in decane, 0.5 mmol) under N<sub>2</sub> atmosphere at room temperature, and the resulting solution was stirred at 50 °C for 10 minutes. The yield was 36% with a ratio of 1.1 : 1 (*k<sub>H</sub>* : *k<sub>D</sub>*), which suggested that the cleavage of the C(sp<sup>3</sup>)-H bond was not the rate-determining steps in this transformation. <sup>1</sup>H NMR (600 MHz, CDCl<sub>3</sub>, ppm) δ 8.06 (d, *J* = 7.4 Hz, 2H), 7.58 (t, *J* = 7.4 Hz, 1H), 7.47 (t, *J* = 7.8 Hz, 2H), 5.16 (dd, *J* = 7.0, 5.2 Hz, 1H), 3.72 (s, 3H), 3.71 (s, 3H), 2.45-2.40 (m, 3.06H), 2.13 (s, 1.58H), 2.10-2.06 (m, 1H), 2.04-1.99 (m, 1H), 1.63-1.58 (m, 2H), 1.25-1.17 (m, 2H), 1.13 (s, 9H). HRMS (ESI) calcd for C<sub>24</sub>H<sub>29</sub>D<sub>5</sub>O<sub>8</sub>Na (M+Na)<sup>+</sup>: 478.2460; found: 478.2458.

(c) Deuterium labeling experiment

The deuterium unactivated alkene substrate **1a** was known compound. Unactivated alkene **1a-d<sub>2</sub>** was prepared as followed procedure.<sup>1</sup>

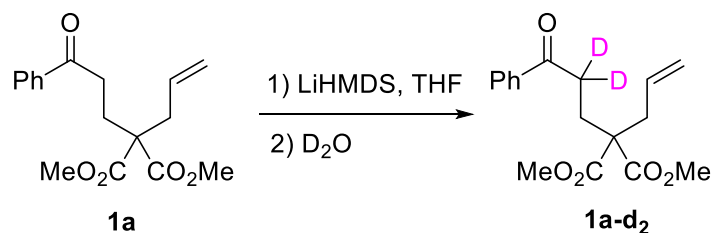

Experimental procedures for the synthesis of **1a-d<sub>2</sub>**: To a solution of **1a** (608.0 mg, 2.0 mmol) in THF (3.0 mL) at -78 °C was slowly added a solution of LiHMDS (5.0 mL, 1.0 M in THF) under N<sub>2</sub>. After being stirred for 1 h at -78 °C, the reaction mixture was quenched by slowly sequential addition of D<sub>2</sub>O (2.0 mL). Then the mixture was warmed to room temperature, stirred for an additional 30 mins, and extracted with ethyl acetate (3 x 5.0 mL). The combined organic extracts were washed with brine (5.0 mL), dried over Na<sub>2</sub>SO<sub>4</sub>, filtered, and concentrated. The residue was repeated three times as the procedure described above and purified by flash chromatography on silica gel (ethyl acetate/petroleum ether = 1/12-1/6) to give the dimethyl 2-allyl-2-(3-(4-bromophenyl)-3-oxopropyl) malonate-**d<sub>2</sub>** (**1a-d<sub>2</sub>**) (535.0 mg, 88% yield) as a colorless oil. **1a-d<sub>2</sub>**<sup>2</sup>: Colorless oil; <sup>1</sup>H NMR (400 MHz, CDCl<sub>3</sub>, ppm) δ 7.94 (d, *J* = 7.2 Hz, 2H), 7.56 (t, *J* = 7.4 Hz, 1H), 7.45 (t, *J* = 7.8 Hz, 2H), 5.74-5.64 (m, 1H), 5.16-5.11 (m, 2H), 3.72 (s, 6H), 3.02-2.91 (m, 0.14H), 2.71 (d, *J* = 7.4 Hz, 2H), 2.30 (s, 2H).

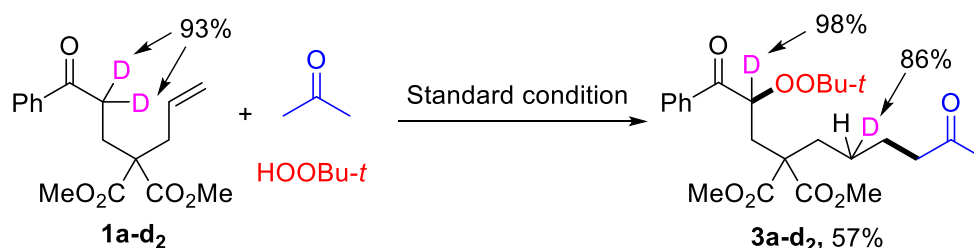

To a 10 mL sealable pressure tube was added unactivated alkenes **1a-d<sub>2</sub>** (0.1 mmol), *p*-TsOH·H<sub>2</sub>O (0.03 mmol), acetone (0.6 mL) and *t*-BuOOH (5.5 M in decane, 0.5 mmol) under N<sub>2</sub> atmosphere at room temperature, and the resulting solution was stirred at 50 °C for 5 h. The resulting mixture and the solvent were evaporated under vacuum. The residue was purified by flash column chromatography on silica gel (ethyl acetate/petroleum ether = 1/8-1/5) to give the peroxide **3a-d<sub>2</sub>** in 54% yield (24.3 mg).

**3a-d<sub>2</sub>**: Colorless oil; <sup>1</sup>H NMR (600 MHz, CDCl<sub>3</sub>, ppm) δ 8.05 (d, *J* = 7.3 Hz, 2H), 7.57 (t, *J* = 7.4 Hz, 1H), 7.46 (t, *J* = 7.9 Hz, 2H), 5.15 (dd, *J* = 7.2, 5.2 Hz, 0.02H), 3.70 (s, 3H), 3.69 (s, 3H), 2.44-2.41 (m, 4H), 2.12 (s, 3H), 2.09-2.04 (m, 1H), 2.01-1.97 (m, 1H), 1.61-1.57 (m, 2H), 1.23-1.17 (m,

1.14H), 1.12 (s, 9H);  $^{13}\text{C}$  NMR (150 MHz,  $\text{CDCl}_3$ , ppm)  $\delta$  208.6, 197.9, 171.3, 171.2, 135.2, 133.3, 129.0, 128.5, 80.8, 55.9, 52.7, 52.6, 43.2, 33.1, 32.7, 29.9, 26.4, 23.7; HRMS (ESI) calcd for  $\text{C}_{24}\text{H}_{32}\text{D}_2\text{O}_8\text{Na}$  ( $\text{M}+\text{Na}$ ) $^+$ : 475.2271; found: 475.2266.

## 6. References

- (1) L. Huang, S. C. Zheng, B. Tan and X. Y. Liu, Metal-Free Direct 1,6- and 1,2-Difunctionalization Triggered by Radical Trifluoromethylation of Alkenes, *Org. Lett.*, 2015, **17**, 1589-1592.
- (2) L. Wang, Y. Ma, Y. Jiang, L. Lv and Z. Li, A Mn-catalyzed Remote C(sp<sup>3</sup>)-H Bond Peroxidation Triggered by Radical Trifluoromethylation of Unactivated Alkenes, *Chem. Commun.*, 2021, **57**, 7846-7849.
- (3) W. Yu, H. Jiang, L. Yan, Z. Feng, Y. Luo and P. Xu, Visible-Light induced Generation of Bifunctional Nitrogen-Centered Radicals: a Concise Synthetic Strategy to Construct Bicyclo[3.2.1] octane and Azepane cores, *Sci. China Chem.*, 2021, **64**, 274-280.

## 7. Copies of $^1\text{H}$ NMR and $^{13}\text{C}$ NMR, $^{19}\text{F}$ NMR spectra for all products

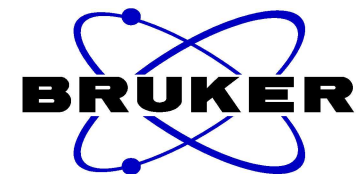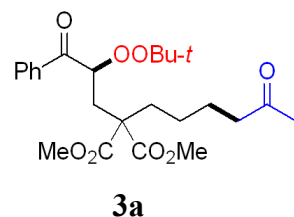

8.069  
8.056  
7.588  
7.575  
7.563  
7.484  
7.471  
7.458

5.170  
5.162  
5.158  
5.149  
3.715  
3.708  
2.450  
2.438  
2.429  
2.425  
2.130  
2.112  
2.104  
2.089  
2.082  
2.068  
2.060  
2.038  
2.030  
2.017  
2.010  
1.994  
1.986  
1.630  
1.618  
1.605  
1.593  
1.580  
1.297  
1.270  
1.258  
1.246  
1.242  
1.234

NAME w11-574p-20210708  
EXPNO 1  
PROCNO 1  
Date\_ 20210708  
Time 17.16  
INSTRUM spect  
PROBHD 5 mm PABBO BB/  
PULPROG zg30  
TD 65536  
SOLVENT CDC13  
NS 8  
DS 0  
SWH 9615.385 Hz  
FIDRES 0.146719 Hz  
AQ 3.4079220 sec  
RG 56.75  
DW 52.000 usec  
DE 6.50 usec  
TE 299.4 K  
D1 1.00000000 sec  
TD0 1

===== CHANNEL f1 =====  
SFO1 600.1739011 MHz  
NUC1 1H  
P1 9.96 usec  
SI 65536  
SF 600.1700083 MHz  
WDW EM  
SSB 0  
LB 0.30 Hz  
GB 0  
PC 1.00

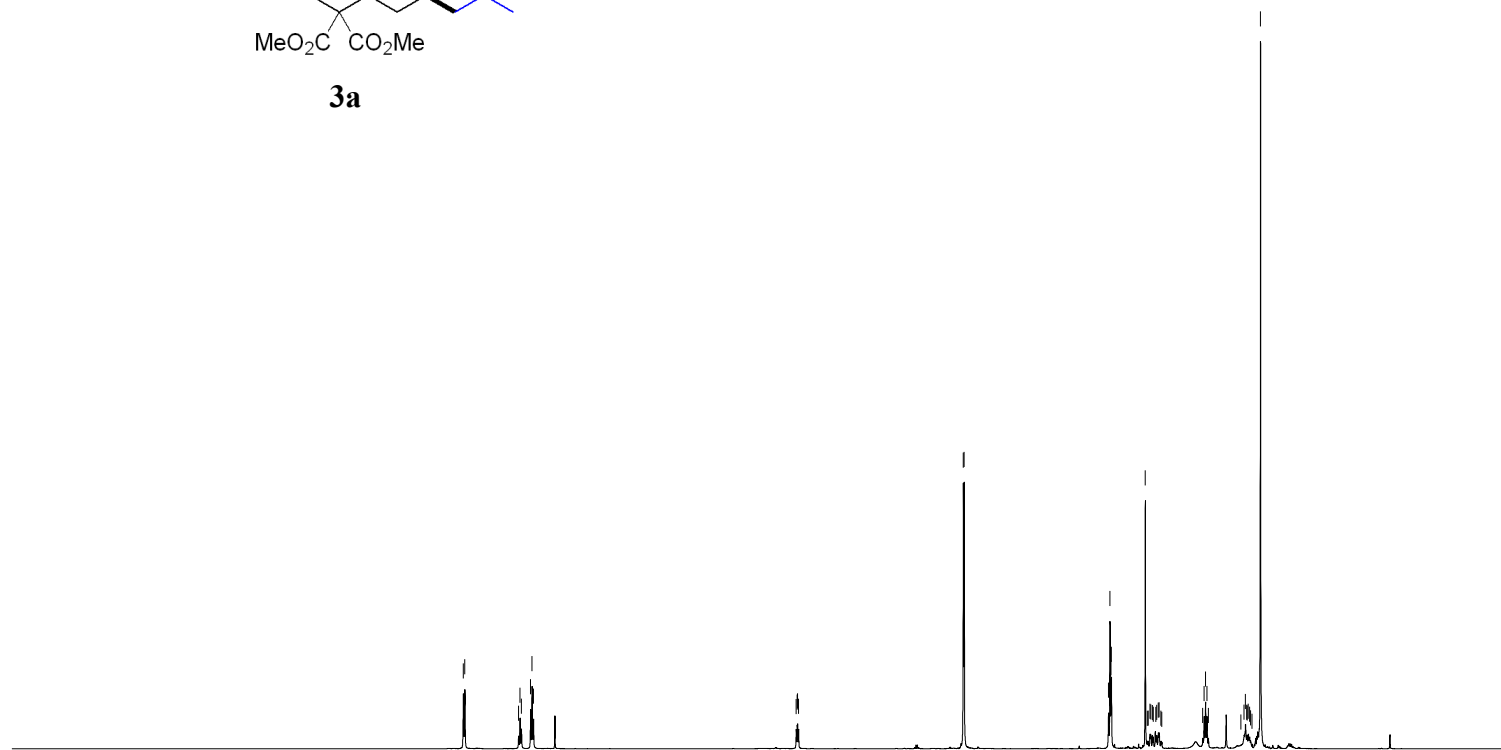

11 10 9 8 7 6 5 4 3 2 1 0 ppm

1.98 1.00 1.99 0.98 2.98 2.86 3.99 2.91 1.05 1.04 2.08 2.10 8.96

— 208.547

— 197.900

< 171.311  
< 171.274

< 135.205  
< 133.301  
< 129.026  
< 128.506

< 81.565  
< 80.829

< 55.922  
< 52.659  
< 52.562  
— 43.213  
— 33.174  
— 32.800  
— 29.935  
— 26.377  
— 23.770

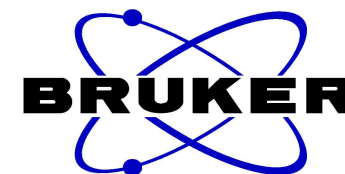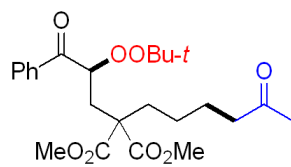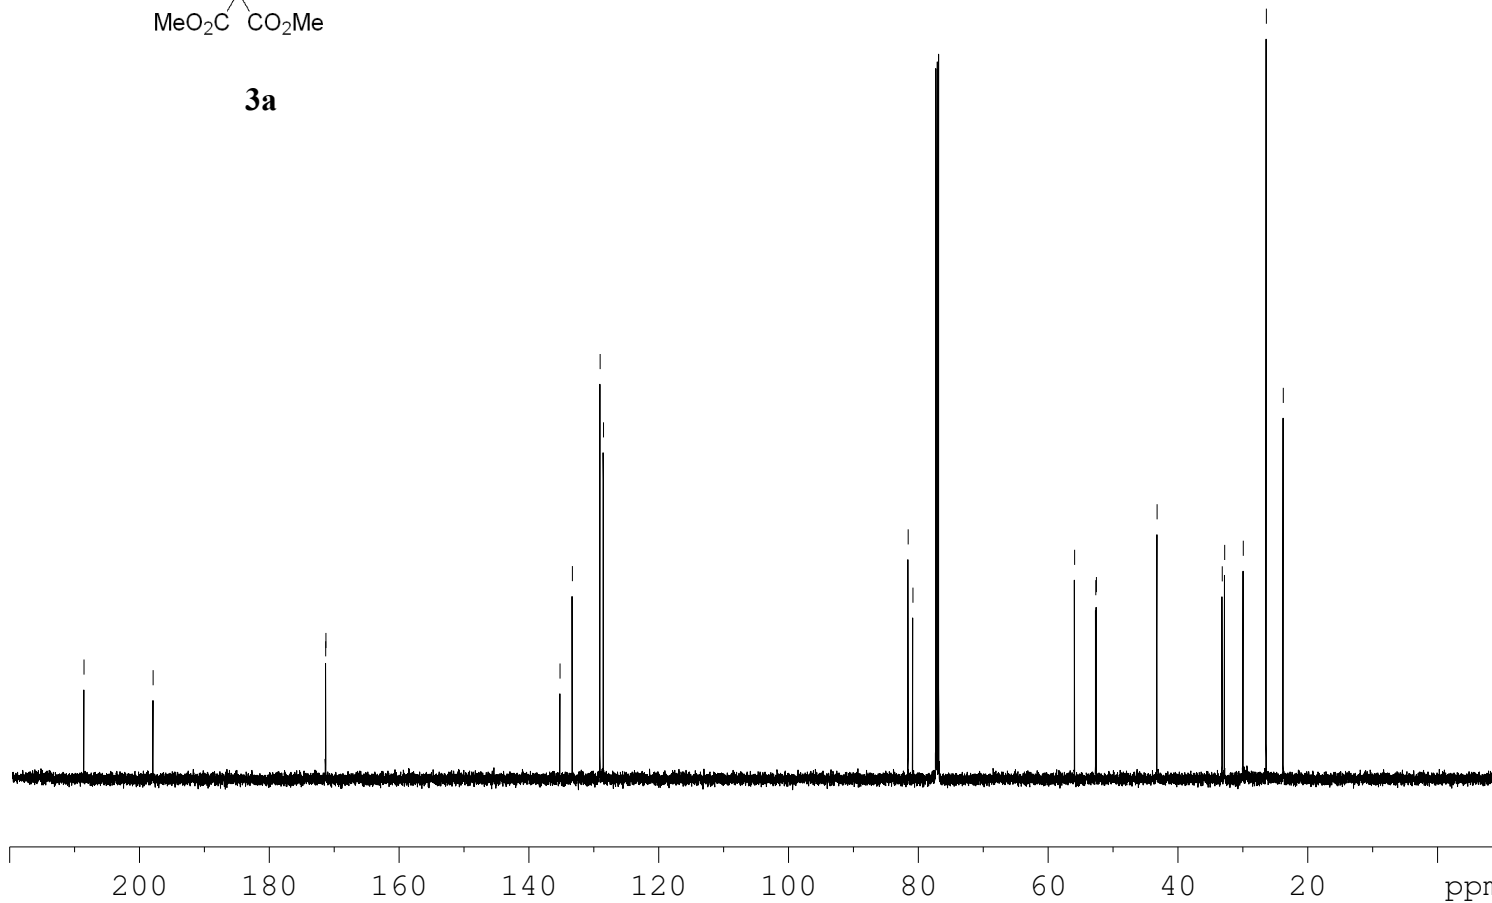

NAME w11-574p-20210729  
EXPNO 1  
PROCNO 1  
Date\_ 20210729  
Time 22.28  
INSTRUM spect  
PROBHD 5 mm PABBO BB/  
PULPROG zgpg30  
TD 65536  
SOLVENT CDCl3  
NS 100  
DS 4  
SWH 36057.691 Hz  
FIDRES 0.550197 Hz  
AQ 0.9088159 sec  
RG 190.02  
DW 13.867 usec  
DE 6.50 usec  
TE 298.2 K  
D1 2.0000000 sec  
D11 0.0300000 sec  
TD0 1

==== CHANNEL f1 =====  
SFO1 150.9279571 MHz  
NUC1 13C  
P1 14.00 usec  
SI 32768  
SF 150.9128665 MHz  
WDW EM  
SSB 0  
LB 1.00 Hz  
GB 0  
PC 1.40

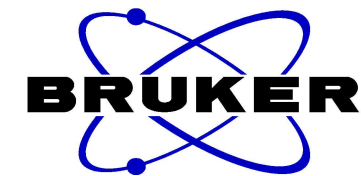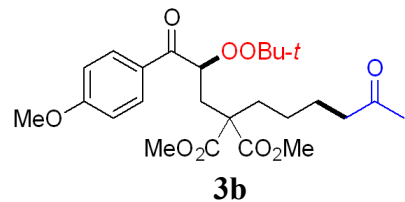

8.081  
8.066  
6.951  
6.936  
5.120  
5.112  
5.107  
5.099  
3.876  
3.715  
3.704  
2.447  
2.435  
2.422  
2.420  
2.413  
2.406  
2.127  
2.104  
2.097  
2.081  
2.074  
2.060  
2.053  
2.027  
2.019  
2.006  
1.998  
1.983  
1.975  
1.622  
1.609  
1.597  
1.584  
1.572  
1.279  
1.257  
1.249  
1.237  
1.228  
1.224  
1.216

NAME w11-544p-20210608  
EXPNO 1  
PROCNO 1  
Date\_ 20210609  
Time 0.38  
INSTRUM spect  
PROBHD 5 mm PABBO BB/  
PULPROG zg30  
TD 65536  
SOLVENT CDC13  
NS 8  
DS 0  
SWH 9615.385 Hz  
FIDRES 0.146719 Hz  
AQ 3.4079220 sec  
RG 56.75  
DW 52.000 usec  
DE 6.50 usec  
TE 295.7 K  
D1 1.00000000 sec  
TD0 1

==== CHANNEL f1 =====  
SFO1 600.1739011 MHz  
NUC1 1H  
P1 9.96 usec  
SI 65536  
SF 600.1700107 MHz  
WDW EM  
SSB 0  
LB 0.30 Hz  
GB 0  
PC 1.00

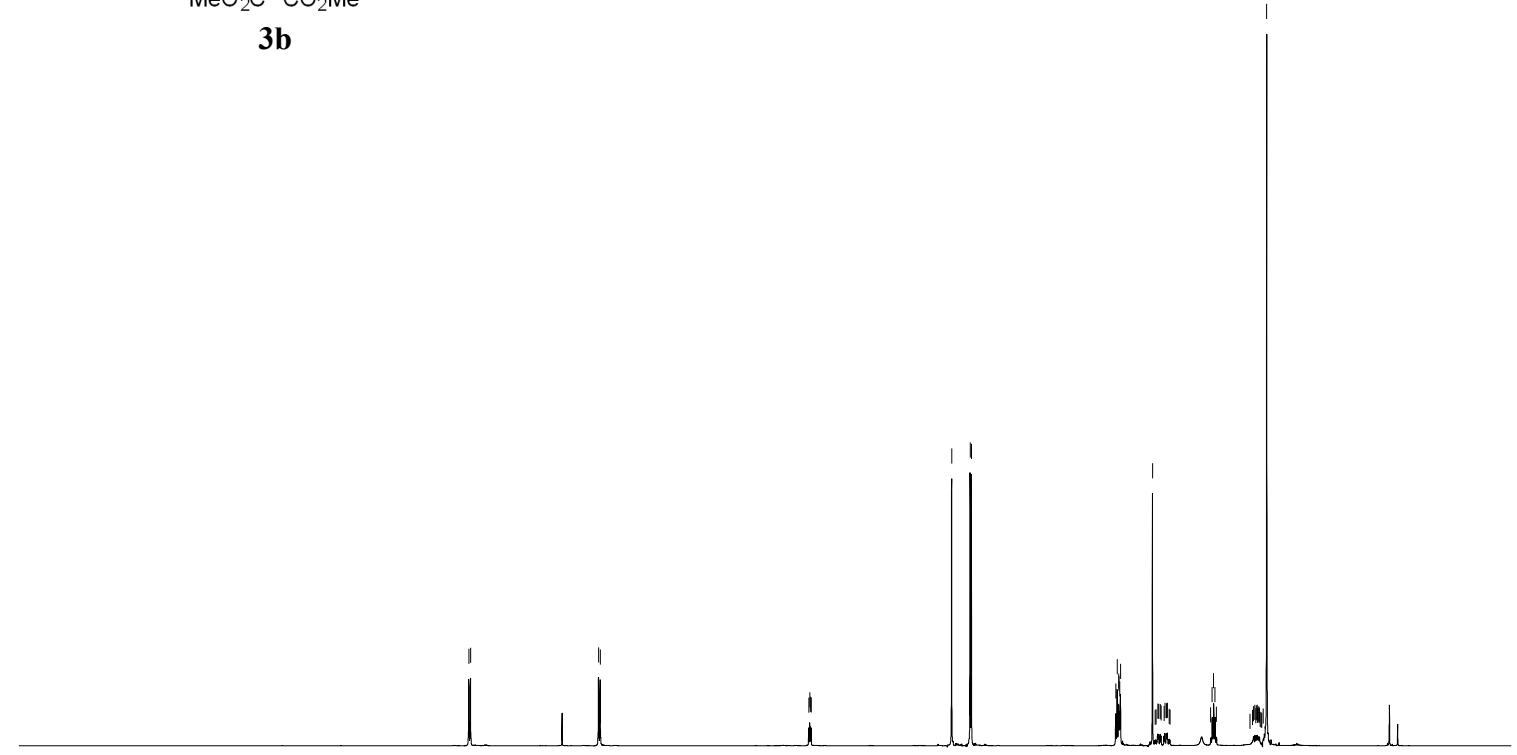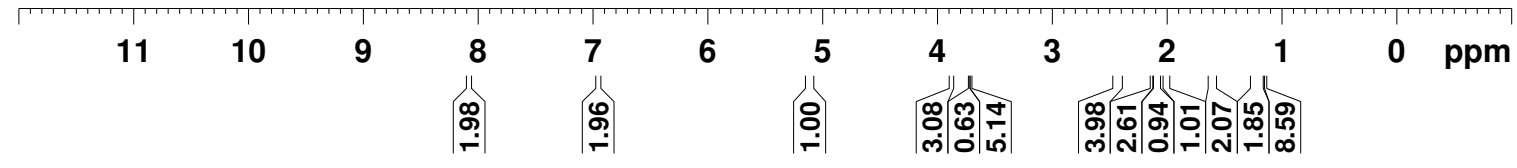

— 208.571

— 196.248

— 171.347

— 171.326

— 163.677

— 131.447

— 128.124

— 113.707

— 81.616  
— 80.767

— 55.916

— 55.469

— 52.653

— 52.553

— 43.226

— 33.394

— 32.754

— 29.942

— 26.419

— 23.778

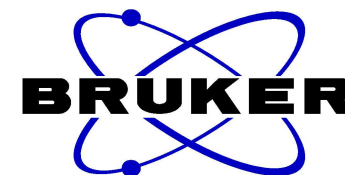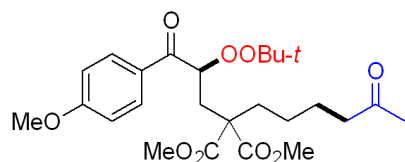

**3b**

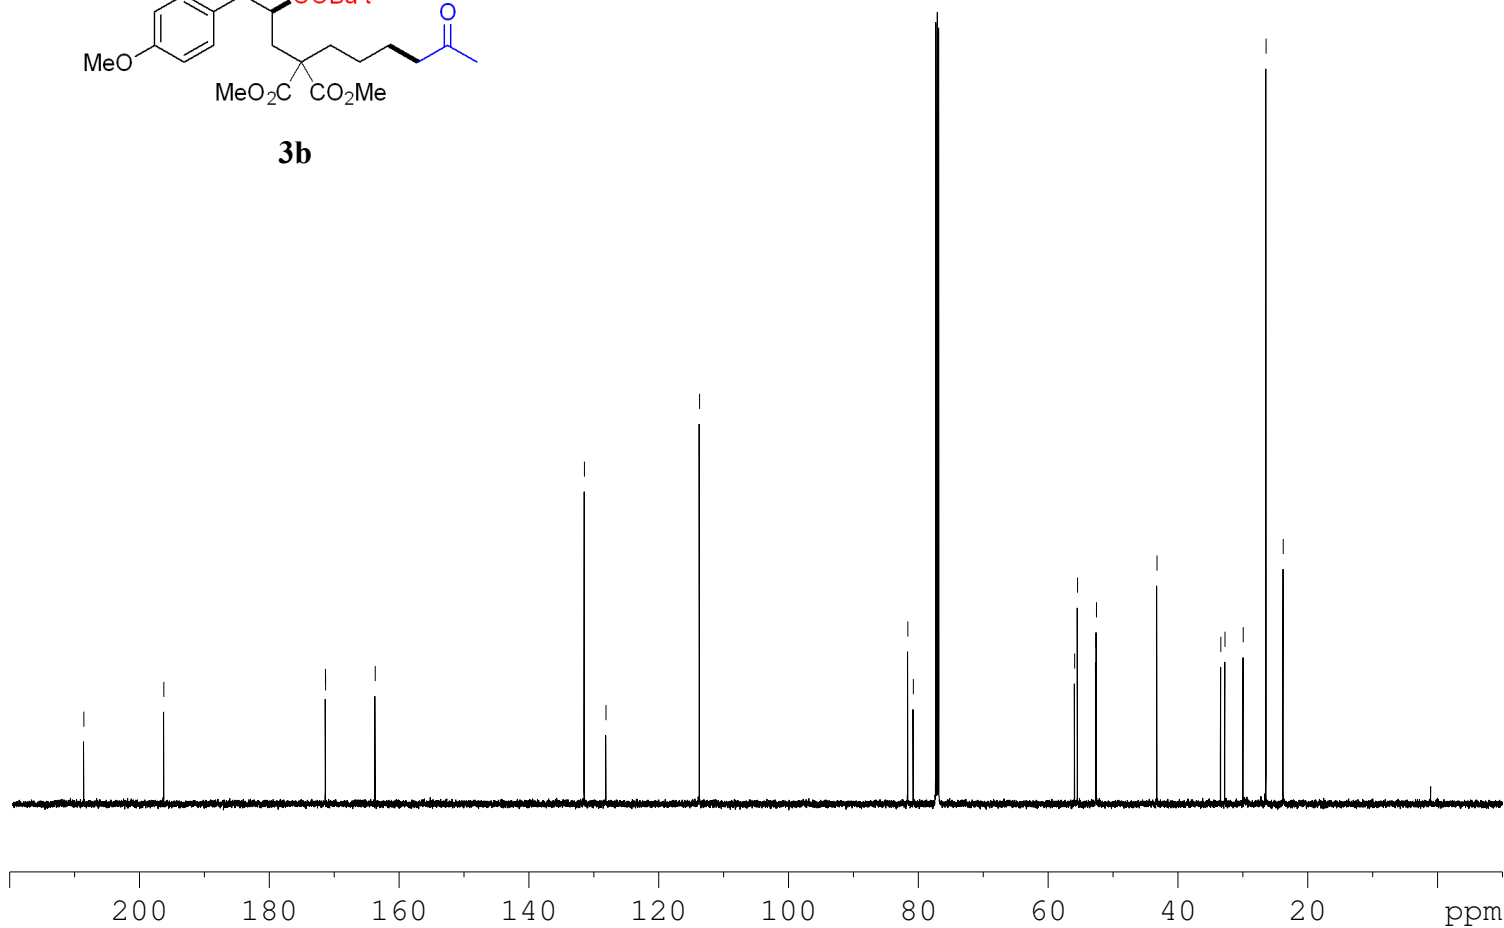

```
NAME      w11-544p-20210608
EXPNO     2
PROCNO    1
Date_     20210609
Time      0.54
INSTRUM   spect
PROBHD    5 mm PABBO BB/
PULPROG   zgpg30
TD         65536
SOLVENT   CDCl3
NS         300
DS         4
SWH        36057.691 Hz
FIDRES     0.550197 Hz
AQ         0.9088159 sec
RG         190.02
DW         13.867 usec
DE         6.50 usec
TE         296.9 K
D1         2.00000000 sec
D11        0.03000000 sec
TD0        1
```

```
===== CHANNEL f1 =====
SFO1      150.9279571 MHz
NUC1       13C
P1         14.00 usec
SI         32768
SF         150.9128665 MHz
WDW        EM
SSB        0
LB         1.00 Hz
GB         0
PC         1.40
```



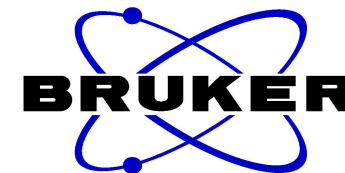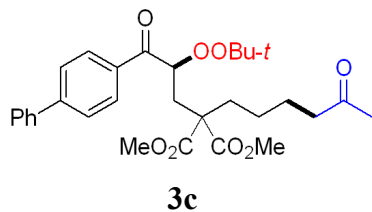

8.167  
8.153  
7.711  
7.697  
7.652  
7.640  
7.491  
7.479  
7.466  
7.419  
7.407  
7.394  
5.197  
5.186  
5.176  
3.734  
3.724  
2.467  
2.460  
2.457  
2.448  
2.436  
2.131  
2.108  
2.100  
2.087  
2.079  
2.057  
2.050  
2.045  
2.036  
2.029  
2.013  
2.006  
1.642  
1.630  
1.617  
1.605  
1.592  
1.285  
1.273  
1.271  
1.264  
1.258  
1.252  
1.243  
1.239  
1.231

NAME w11-548p-20210610  
EXPNO 1  
PROCNO 1  
Date\_ 20210610  
Time 17.29  
INSTRUM spect  
PROBHD 5 mm PABBO BB/  
PULPROG zg30  
TD 65536  
SOLVENT CDC13  
NS 8  
DS 0  
SWH 9615.385 Hz  
FIDRES 0.146719 Hz  
AQ 3.4079220 sec  
RG 50.85  
DW 52.000 usec  
DE 6.50 usec  
TE 295.6 K  
D1 1.00000000 sec  
TD0 1

===== CHANNEL f1 =====  
SFO1 600.1739011 MHz  
NUC1 1H  
P1 9.96 usec  
SI 65536  
SF 600.1700113 MHz  
WDW EM  
SSB 0  
LB 0.30 Hz  
GB 0  
PC 1.00

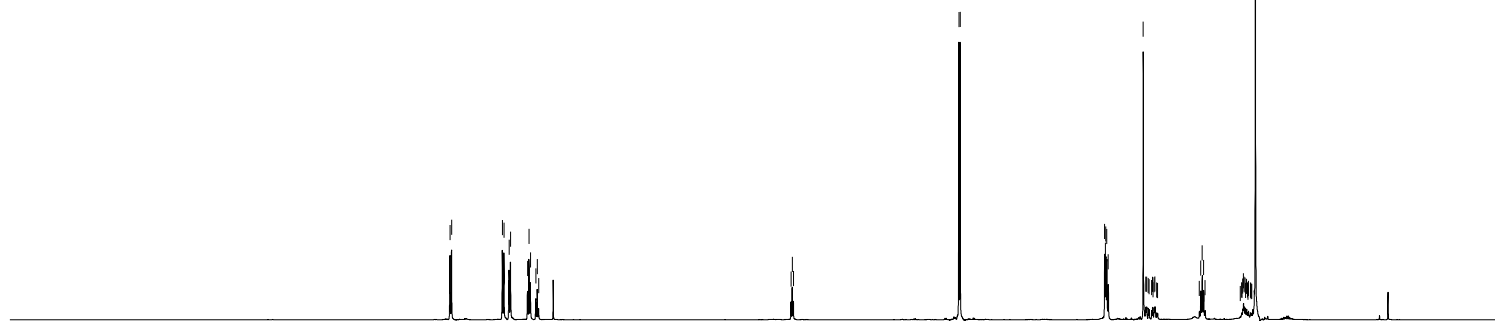

11 10 9 8 7 6 5 4 3 2 1 0 ppm

2.04  
2.06  
2.07  
2.13  
1.06  
1.00  
2.96  
3.00  
4.05  
3.00  
1.02  
1.15  
2.13  
2.12  
9.13

— 208.525

— 197.429

< 171.332  
< 171.304

< 145.927  
< 139.884  
< 133.839  
< 129.676  
< 128.973  
< 128.275  
< 127.277  
< 127.145

< 81.783  
< 80.895

< 55.941  
< 52.692  
< 52.596  
— 43.229  
< 33.287  
< 32.820  
< 29.955  
< 26.427  
< 23.793

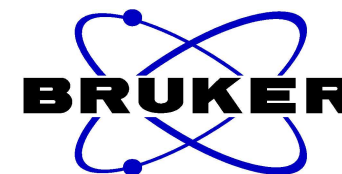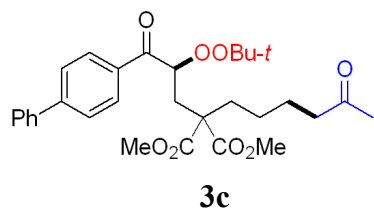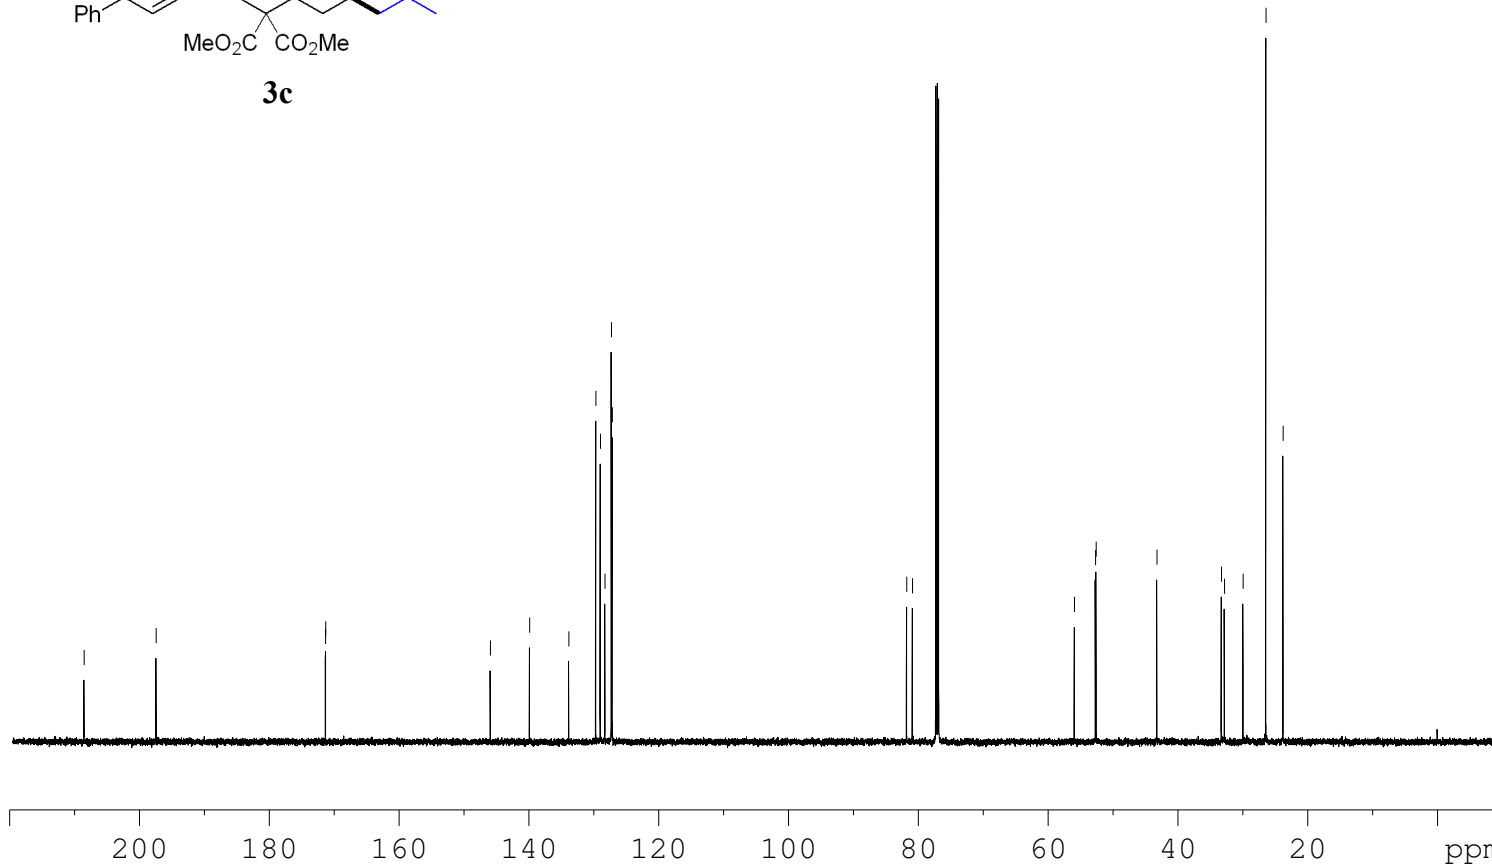

```
NAME      w11-548p-20210610
EXPNO     2
PROCNO    1
Date_     20210611
Time      0.14
INSTRUM   spect
PROBHD    5 mm PABBO BB/
PULPROG   zgpg30
TD         65536
SOLVENT   CDCl3
NS         300
DS         4
SWH       36057.691 Hz
FIDRES    0.550197 Hz
AQ         0.9088159 sec
RG         190.02
DW         13.867 usec
DE         6.50 usec
TE         296.8 K
D1         2.00000000 sec
D11        0.03000000 sec
TD0        1
```

```
===== CHANNEL f1 =====
SFO1     150.9279571 MHz
NUC1      13C
P1        14.00 usec
SI        32768
SF        150.9128665 MHz
WDW       EM
SSB       0
LB        1.00 Hz
GB        0
PC        1.40
```

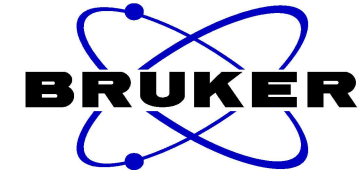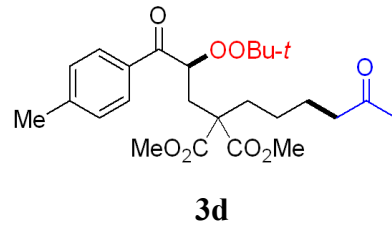

7.979  
7.965

7.278  
7.264

5.157  
5.147  
5.136  
3.716  
3.708  
2.452  
2.440  
2.427  
2.418  
2.408  
2.133  
2.111  
2.103  
2.088  
2.081  
2.067  
2.059  
2.052  
2.033  
2.025  
2.012  
2.005  
1.989  
1.981  
1.627  
1.615  
1.603  
1.590  
1.577  
1.259  
1.254  
1.251  
1.246  
1.240  
1.233  
1.225

```

NAME      w11-545p-20210608
EXPNO      1
PROCNO     1
Date_      20210609
Time       0.58
INSTRUM    spect
PROBHD     5 mm PABBO BB/
PULPROG    zg30
TD          65536
SOLVENT    CDC13
NS          8
DS          0
SWH         9615.385 Hz
FIDRES     0.146719 Hz
AQ          3.4079220 sec
RG          38.1
DW          52.000 usec
DE          6.50 usec
TE          295.8 K
D1          1.00000000 sec
TD0        1
  
```

```

===== CHANNEL f1 =====
SF01      600.1739011 MHz
NUC1       1H
P1         9.96 usec
SI         65536
SF         600.1700045 MHz
WDW        EM
SSB        0
LB         0.30 Hz
GB         0
PC         1.00
  
```

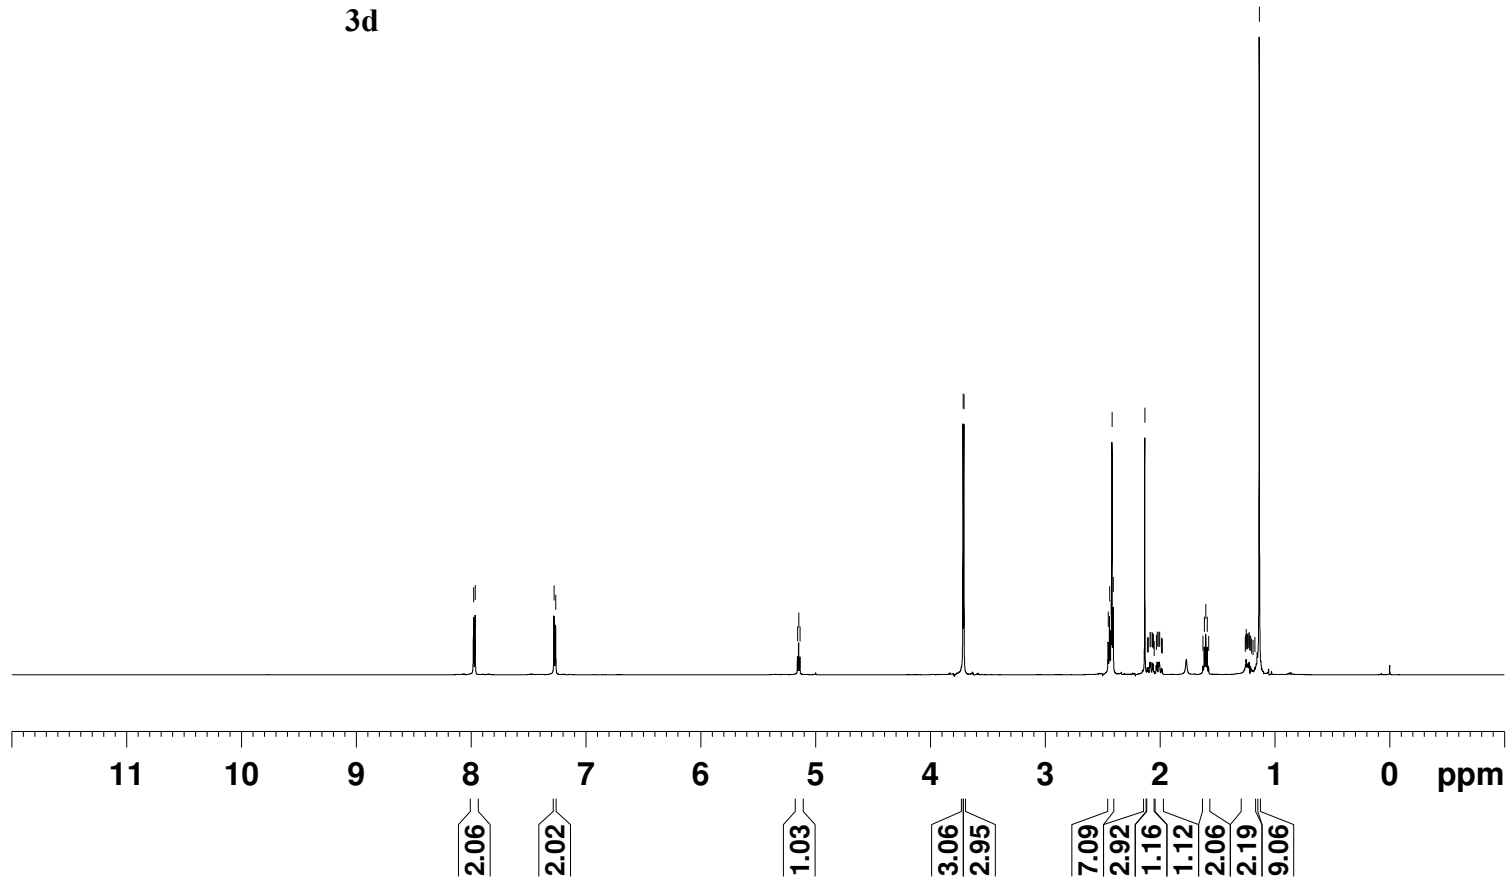

— 208.571

— 197.385

< 171.325  
< 171.289

— 144.200

< 132.633  
< 129.221  
< 129.158

< 81.486  
< 80.780

< 55.915  
< 52.642  
< 52.546  
< 43.219  
< 33.266  
< 32.771  
< 29.931  
< 26.398  
< 23.771  
< 23.760  
< 21.722

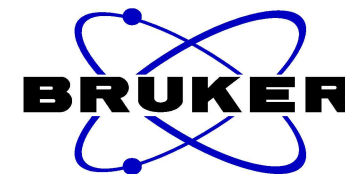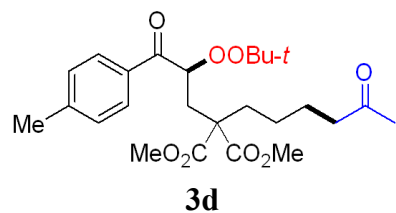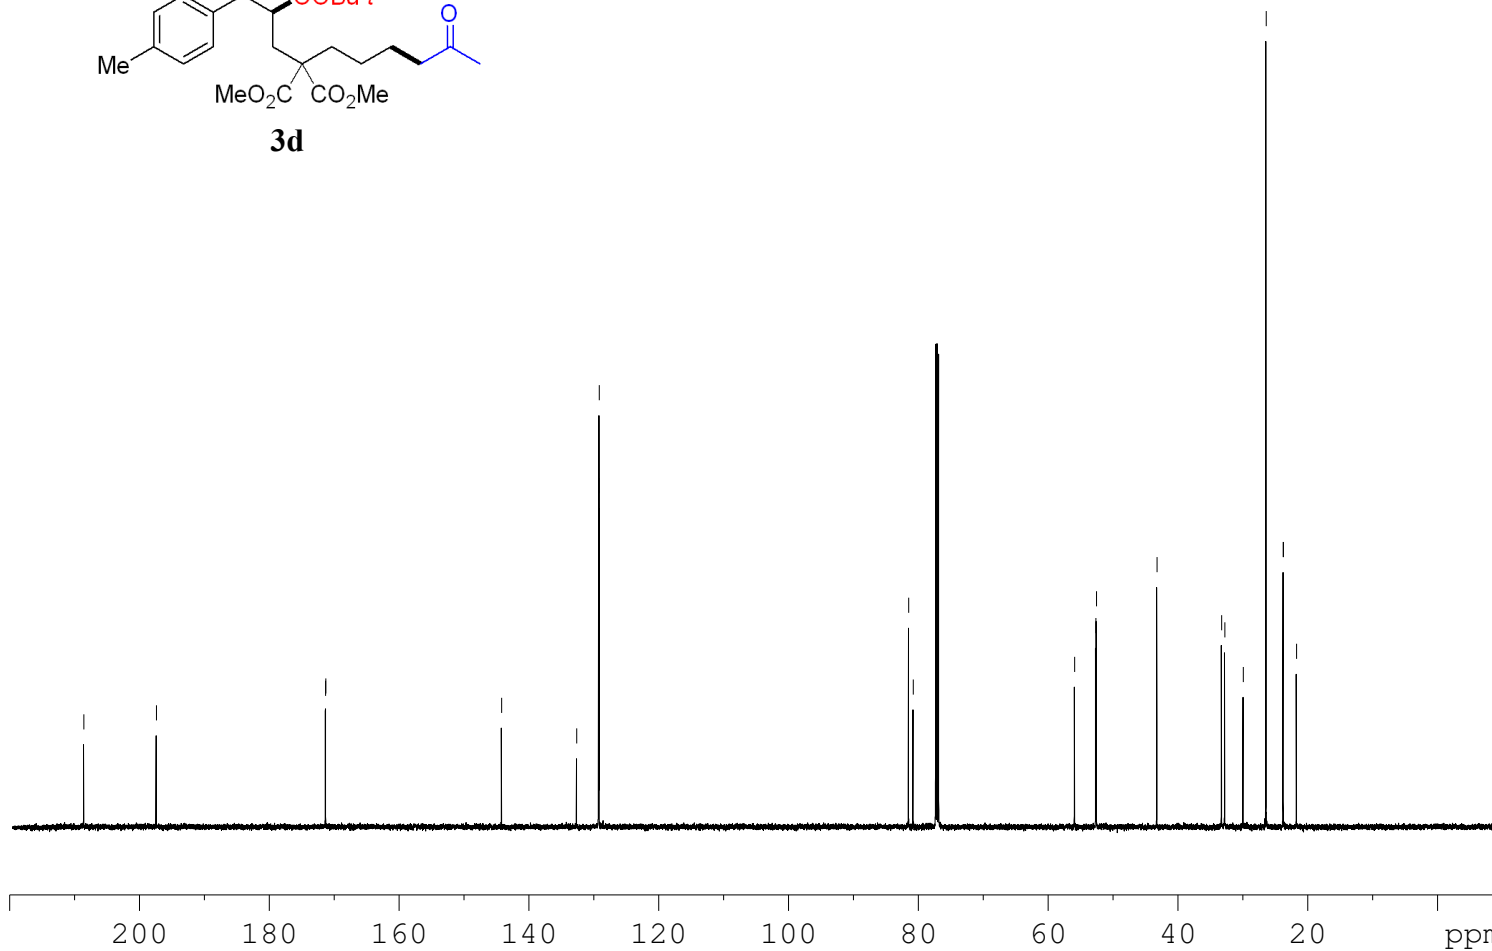

```
NAME      w11-545p-20210608
EXPNO      2
PROCNO     1
Date_      20210609
Time       1.14
INSTRUM    spect
PROBHD     5 mm PABBO BB/
PULPROG    zgpg30
TD         65536
SOLVENT    CDC13
NS         300
DS         4
SWH        36057.691 Hz
FIDRES     0.550197 Hz
AQ         0.9088159 sec
RG         190.02
DW         13.867 usec
DE         6.50 usec
TE         296.9 K
D1         2.0000000 sec
D11        0.0300000 sec
TD0        1
```

```
===== CHANNEL f1 =====
SFO1      150.9279571 MHz
NUC1       13C
P1         14.00 usec
SI         32768
SF         150.9128665 MHz
WDW        EM
SSB        0
LB         1.00 Hz
GB         0
PC         1.40
```

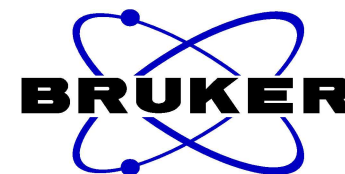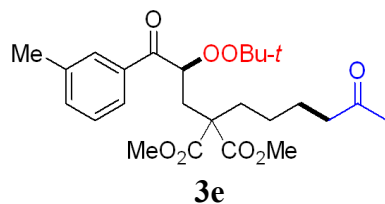

7.865  
7.854  
7.398  
7.385  
7.369  
7.356  
7.343

5.164  
5.153  
5.142  
3.721  
3.710  
2.452  
2.439  
2.424  
2.417  
2.132  
2.119  
2.111  
2.096  
2.088  
2.075  
2.067  
2.037  
2.029  
2.016  
2.009  
1.993  
1.631  
1.618  
1.606  
1.593  
1.581  
1.273  
1.254  
1.241  
1.231  
1.218  
1.212  
1.136

NAME w11-552p-20210610  
 EXPNO 1  
 PROCNO 1  
 Date\_ 20210611  
 Time 5.00  
 INSTRUM spect  
 PROBHD 5 mm PABBO BB/  
 PULPROG zg30  
 TD 65536  
 SOLVENT CDCl3  
 NS 8  
 DS 0  
 SWH 9615.385 Hz  
 FIDRES 0.146719 Hz  
 AQ 3.4079220 sec  
 RG 50.85  
 DW 52.000 usec  
 DE 6.50 usec  
 TE 295.6 K  
 D1 1.00000000 sec  
 TD0 1

===== CHANNEL f1 =====  
 SFO1 600.1739011 MHz  
 NUC1 1H  
 P1 9.96 usec  
 SI 65536  
 SF 600.1700088 MHz  
 WDW EM  
 SSB 0  
 LB 0.30 Hz  
 GB 0  
 PC 1.00

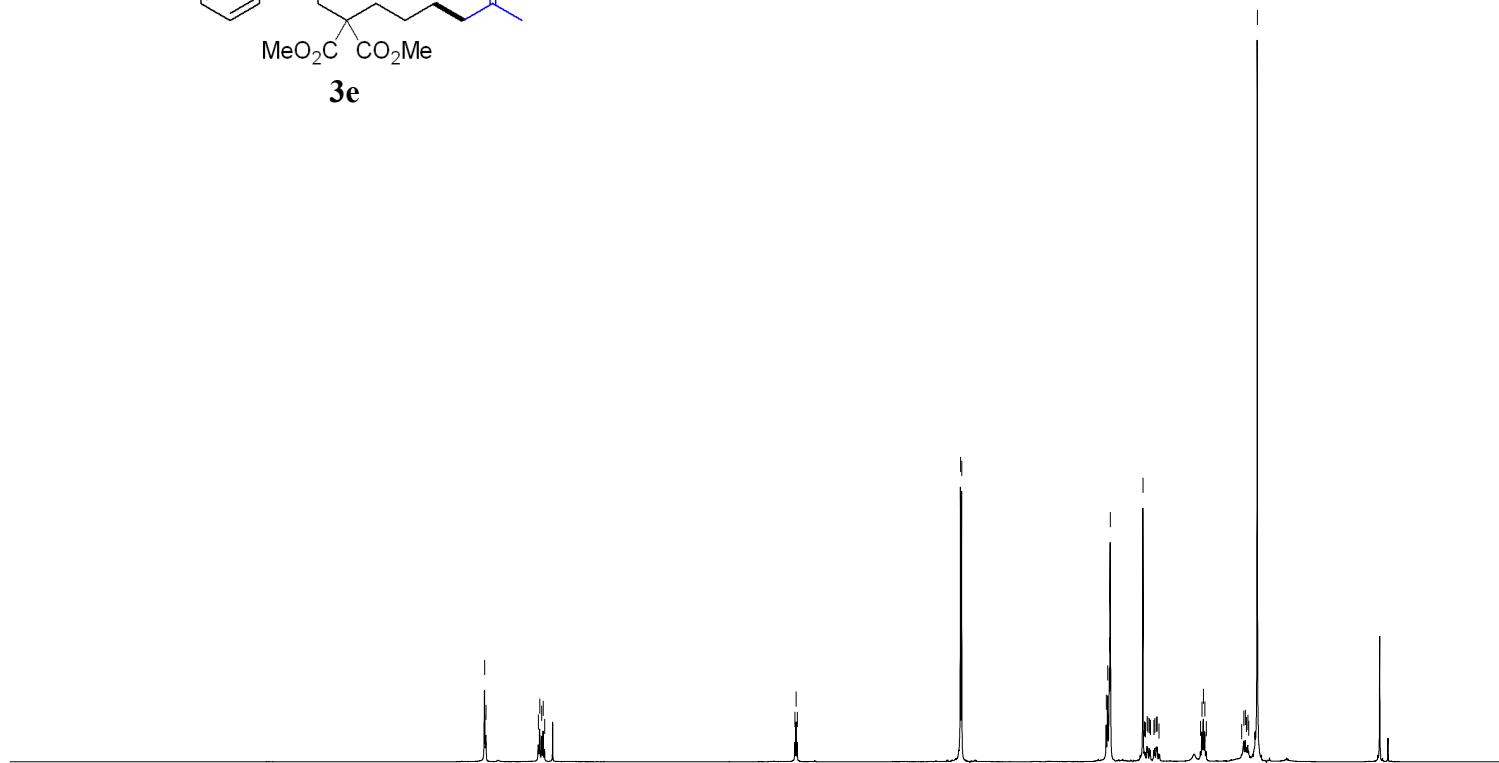

11 10 9 8 7 6 5 4 3 2 1 0 ppm

1.94  
 1.96  
 1.00  
 2.98  
 3.03  
 7.07  
 2.99  
 1.16  
 1.05  
 2.07  
 2.07  
 9.04

— 208.507

— 197.988

< 171.301  
< 171.249

< 138.233  
< 135.150  
< 134.072  
< 129.481  
< 128.345  
< 126.192

< 81.460  
< 80.765

< 55.902  
< 52.630  
< 52.529  
< 43.210  
< 33.169  
< 32.728  
< 29.910  
< 26.373  
< 23.758  
< 21.371

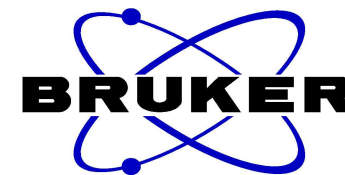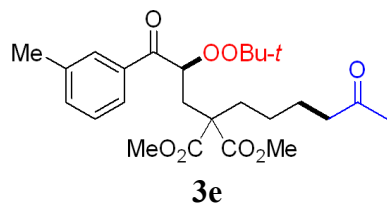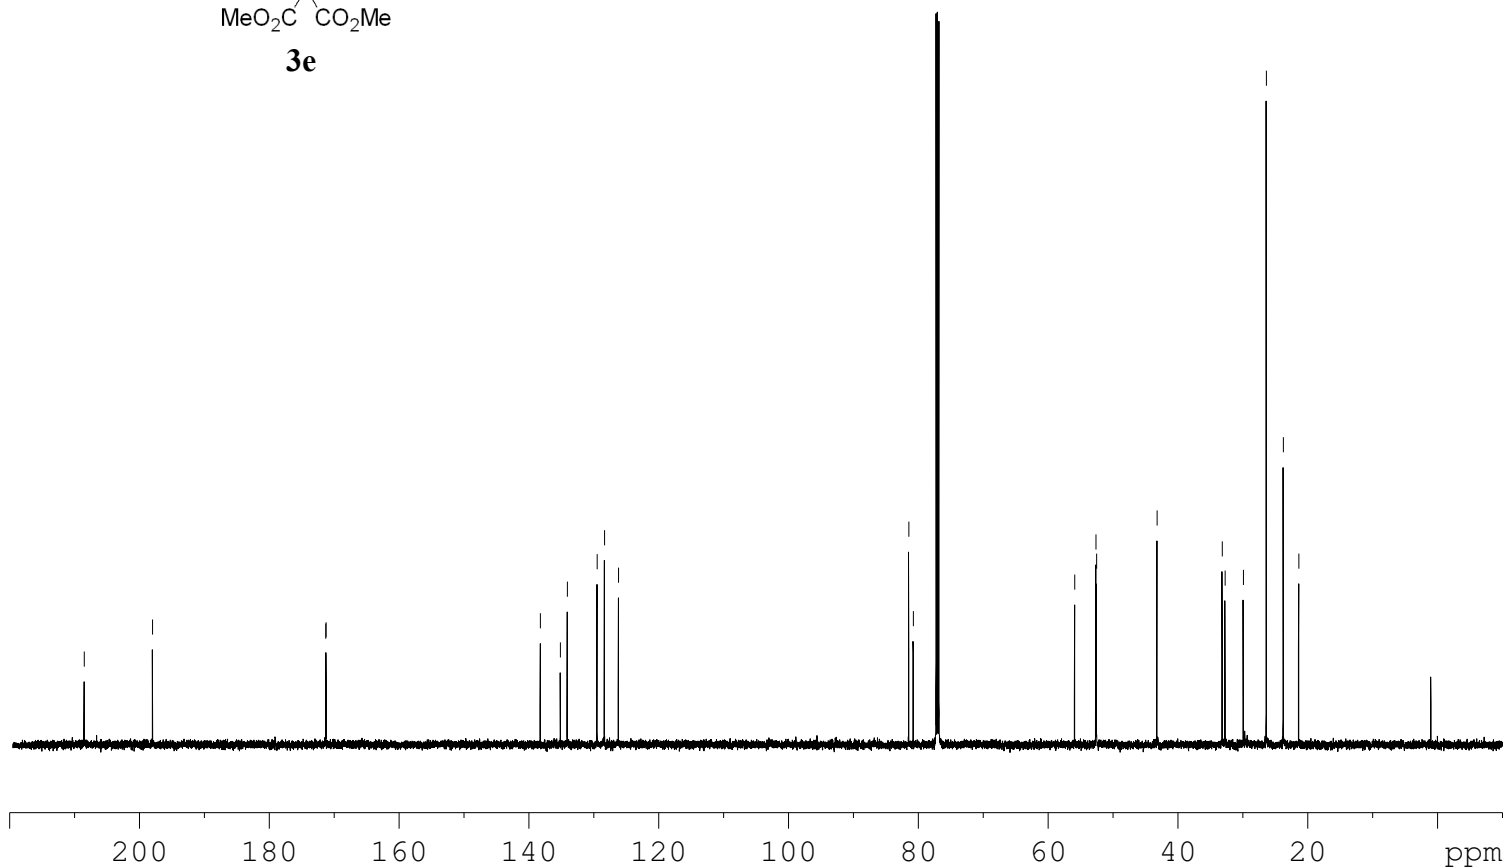

NAME w11-552p-20210610  
EXPNO 2  
PROCNO 1  
Date\_ 20210611  
Time 5.16  
INSTRUM spect  
PROBHD 5 mm PABBO BB/  
PULPROG zgpg30  
TD 65536  
SOLVENT CDC13  
NS 300  
DS 4  
SWH 36057.691 Hz  
FIDRES 0.550197 Hz  
AQ 0.9088159 sec  
RG 190.02  
DW 13.867 usec  
DE 6.50 usec  
TE 296.7 K  
D1 2.00000000 sec  
D11 0.03000000 sec  
TD0 1

==== CHANNEL f1 =====  
SF01 150.9279571 MHz  
NUC1 13C  
P1 14.00 usec  
SI 32768  
SF 150.9128704 MHz  
WDW EM  
SSB 0  
LB 1.00 Hz  
GB 0  
PC 1.40

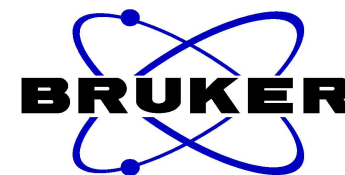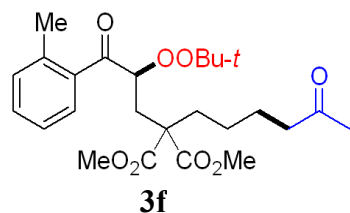

7.673  
7.661  
7.383  
7.381  
7.370  
7.369  
7.358  
7.356  
7.275  
7.265  
7.253  
7.242  
5.040  
5.035  
5.025  
5.020  
3.710  
3.659  
2.459  
2.435  
2.430  
2.422  
2.409  
2.405  
2.397  
2.369  
2.354  
2.343  
2.328  
2.121  
2.088  
2.081  
2.065  
2.058  
2.044  
2.036  
2.018  
2.010  
1.997  
1.989  
1.974  
1.966  
1.606  
1.603  
1.592  
1.580  
1.567  
1.556  
1.554  
1.242  
1.234

NAME w11-549p-20210610  
EXPNO 1  
PROCNO 1  
Date\_ 20210610  
Time 17.33  
INSTRUM spect  
PROBHD 5 mm PABBO BB/  
PULPROG zg30  
TD 65536  
SOLVENT CDCl3  
NS 8  
DS 0  
SWH 9615.385 Hz  
FIDRES 0.146719 Hz  
AQ 3.4079220 sec  
RG 44.5  
DW 52.000 usec  
DE 6.50 usec  
TE 295.6 K  
D1 1.00000000 sec  
TD0 1

==== CHANNEL f1 =====  
SFO1 600.1739011 MHz  
NUC1 1H  
P1 9.96 usec  
SI 65536  
SF 600.1700066 MHz  
WDW EM  
SSB 0  
LB 0.30 Hz  
GB 0  
PC 1.00

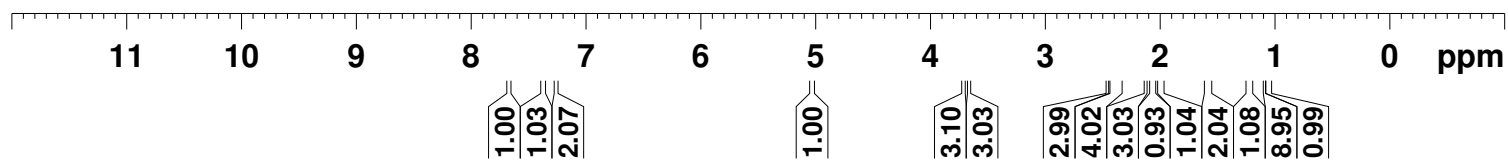

— 208.492  
— 202.095

< 171.340  
< 171.247

< 138.572  
< 136.427  
< 131.666  
< 131.245  
< 128.397  
< 125.294

< 81.952  
< 80.624

< 55.964  
< 52.611  
< 52.559  
< 43.235  
< 32.623  
< 32.536  
< 29.923  
< 26.303  
< 23.778  
< 23.690  
< 20.659

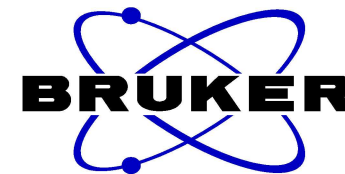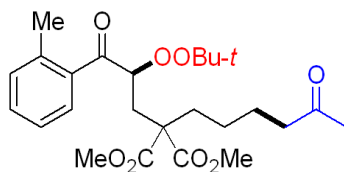

**3f**

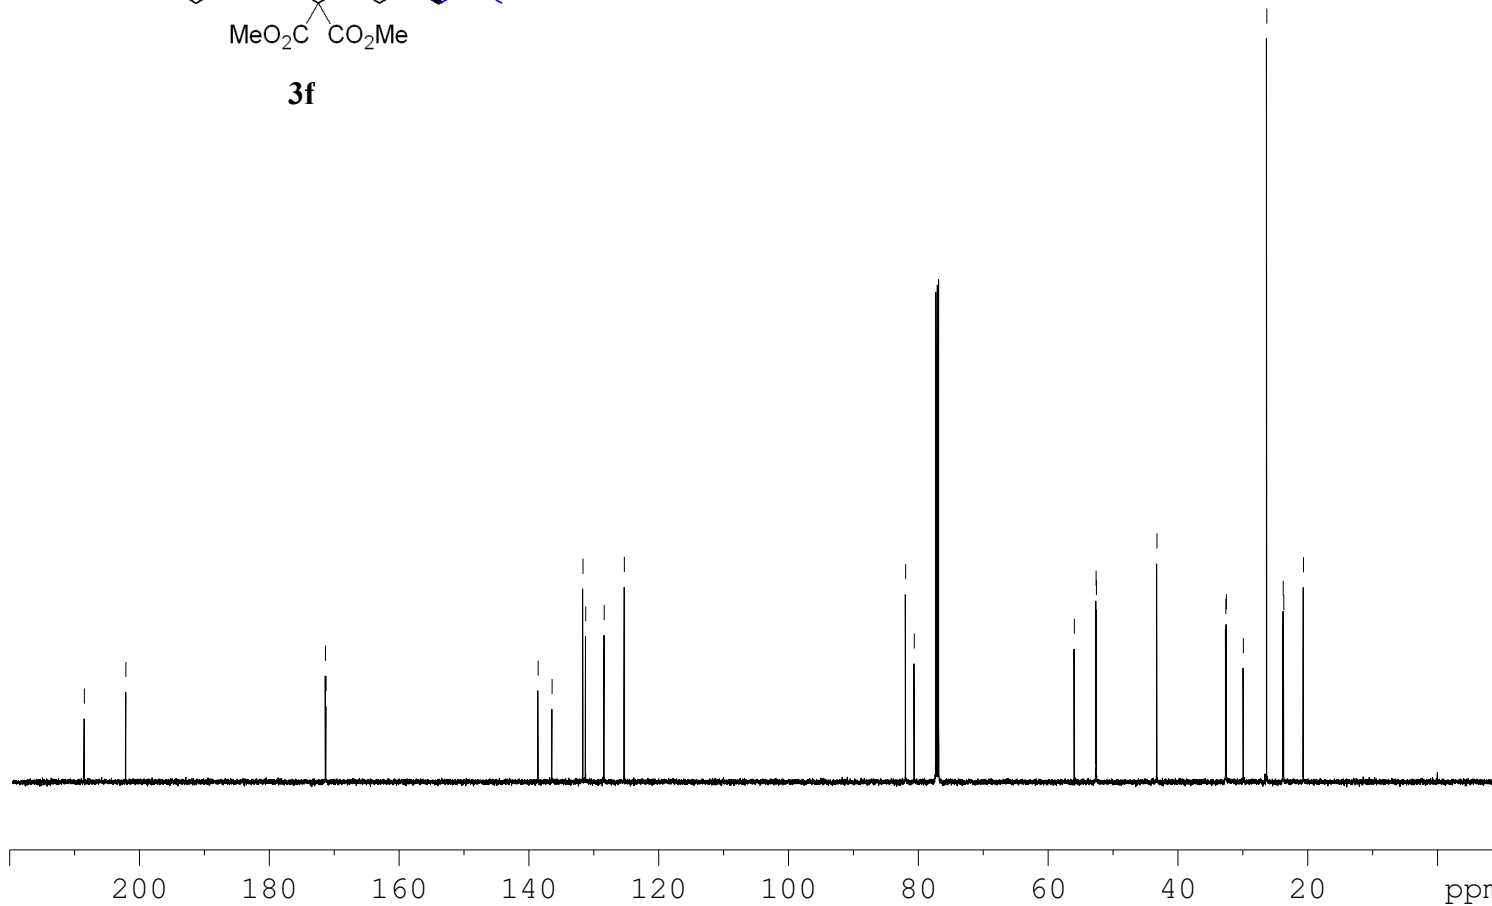

NAME w11-549p-20210610  
EXPNO 2  
PROCNO 1  
Date\_ 20210611  
Time 0.32  
INSTRUM spect  
PROBHD 5 mm PABBO BB/  
PULPROG zgpg30  
TD 65536  
SOLVENT CDCl3  
NS 300  
DS 4  
SWH 36057.691 Hz  
FIDRES 0.550197 Hz  
AQ 0.9088159 sec  
RG 190.02  
DW 13.867 usec  
DE 6.50 usec  
TE 296.9 K  
D1 2.00000000 sec  
D11 0.03000000 sec  
TD0 1

==== CHANNEL f1 =====  
SFO1 150.9279571 MHz  
NUC1 13C  
P1 14.00 usec  
SI 32768  
SF 150.9128665 MHz  
WDW EM  
SSB 0  
LB 1.00 Hz  
GB 0  
PC 1.40



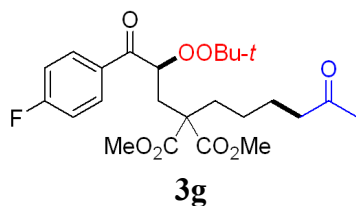

8.149  
8.140  
8.135  
8.126

7.161  
7.147  
7.132

5.099  
5.088  
5.078  
3.726  
3.717  
2.462  
2.450  
2.437  
2.430  
2.420  
2.137  
2.107  
2.099  
2.083  
2.076  
2.063  
2.055  
2.034  
2.027  
2.013  
2.006  
1.990  
1.983  
1.633  
1.621  
1.608  
1.596  
1.583  
1.255  
1.246

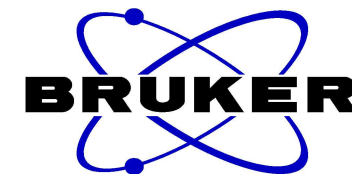

NAME w11-546p-20210608  
 EXPNO 1  
 PROCNO 1  
 Date\_ 20210609  
 Time 2.14  
 INSTRUM spect  
 PROBHD 5 mm PABBO BB/  
 PULPROG zg30  
 TD 65536  
 SOLVENT CDCl3  
 NS 8  
 DS 0  
 SWH 9615.385 Hz  
 FIDRES 0.146719 Hz  
 AQ 3.4079220 sec  
 RG 38.1  
 DW 52.000 usec  
 DE 6.50 usec  
 TE 295.9 K  
 D1 1.00000000 sec  
 TD0 1

===== CHANNEL f1 =====  
 SFO1 600.1739011 MHz  
 NUC1 1H  
 P1 9.96 usec  
 SI 65536  
 SF 600.1700039 MHz  
 WDW EM  
 SSB 0  
 LB 0.30 Hz  
 GB 0  
 PC 1.00

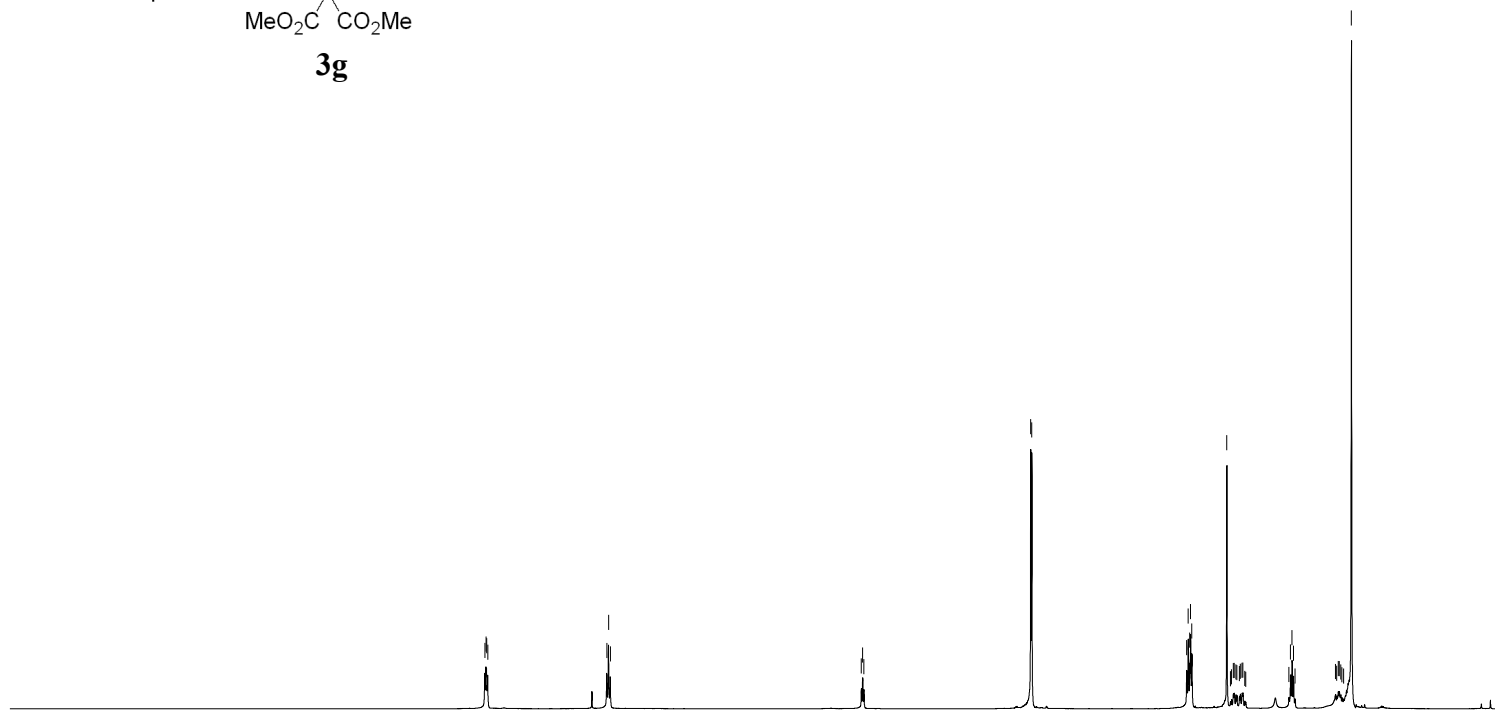

11 10 9 8 7 6 5 4 3 2 1 ppm

2.10

2.07

1.00

3.00  
2.96

4.13

2.99

1.17

1.13

2.10

2.16

9.01

— 208.490

— 196.395

171.259

166.678

164.987

131.887

131.827

131.504

131.485

115.692

115.548

82.040

80.939

55.861

52.699

52.593

43.169

33.217

32.778

29.941

26.362

23.746

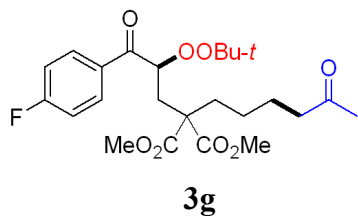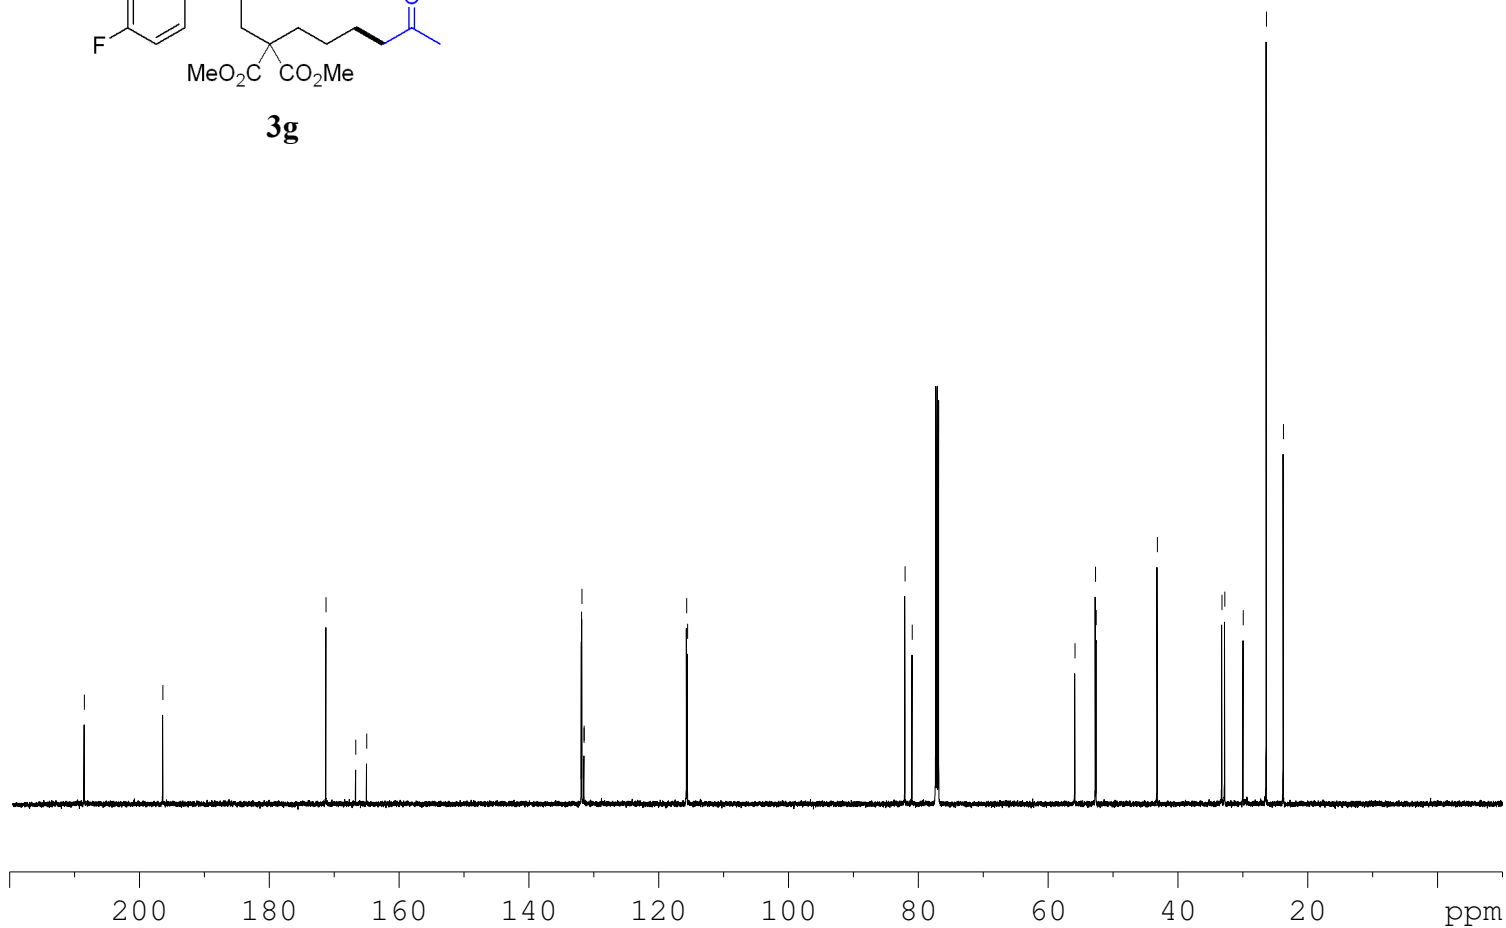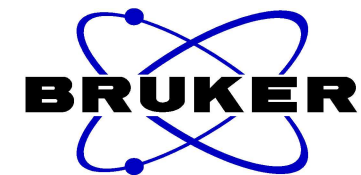

```
NAME      w11-546p-20210608
EXPNO     2
PROCNO    1
Date_     20210609
Time      2.35
INSTRUM   spect
PROBHD    5 mm PABBO BB/
PULPROG   zgpg30
TD        65536
SOLVENT   CDCl3
NS        400
DS        4
SWH       36057.691 Hz
FIDRES    0.550197 Hz
AQ        0.9088159 sec
RG        190.02
DW        13.867 usec
DE        6.50 usec
TE        297.0 K
D1        2.0000000 sec
D11       0.03000000 sec
TD0       1

===== CHANNEL f1 =====
SF01     150.9279571 MHz
NUC1      13C
P1        14.00 usec
SI        32768
SF        150.9128665 MHz
WDW       EM
SSB       0
LB        1.00 Hz
GB        0
PC        1.40
```

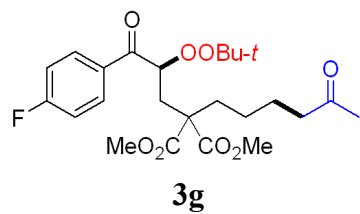

—104.6157

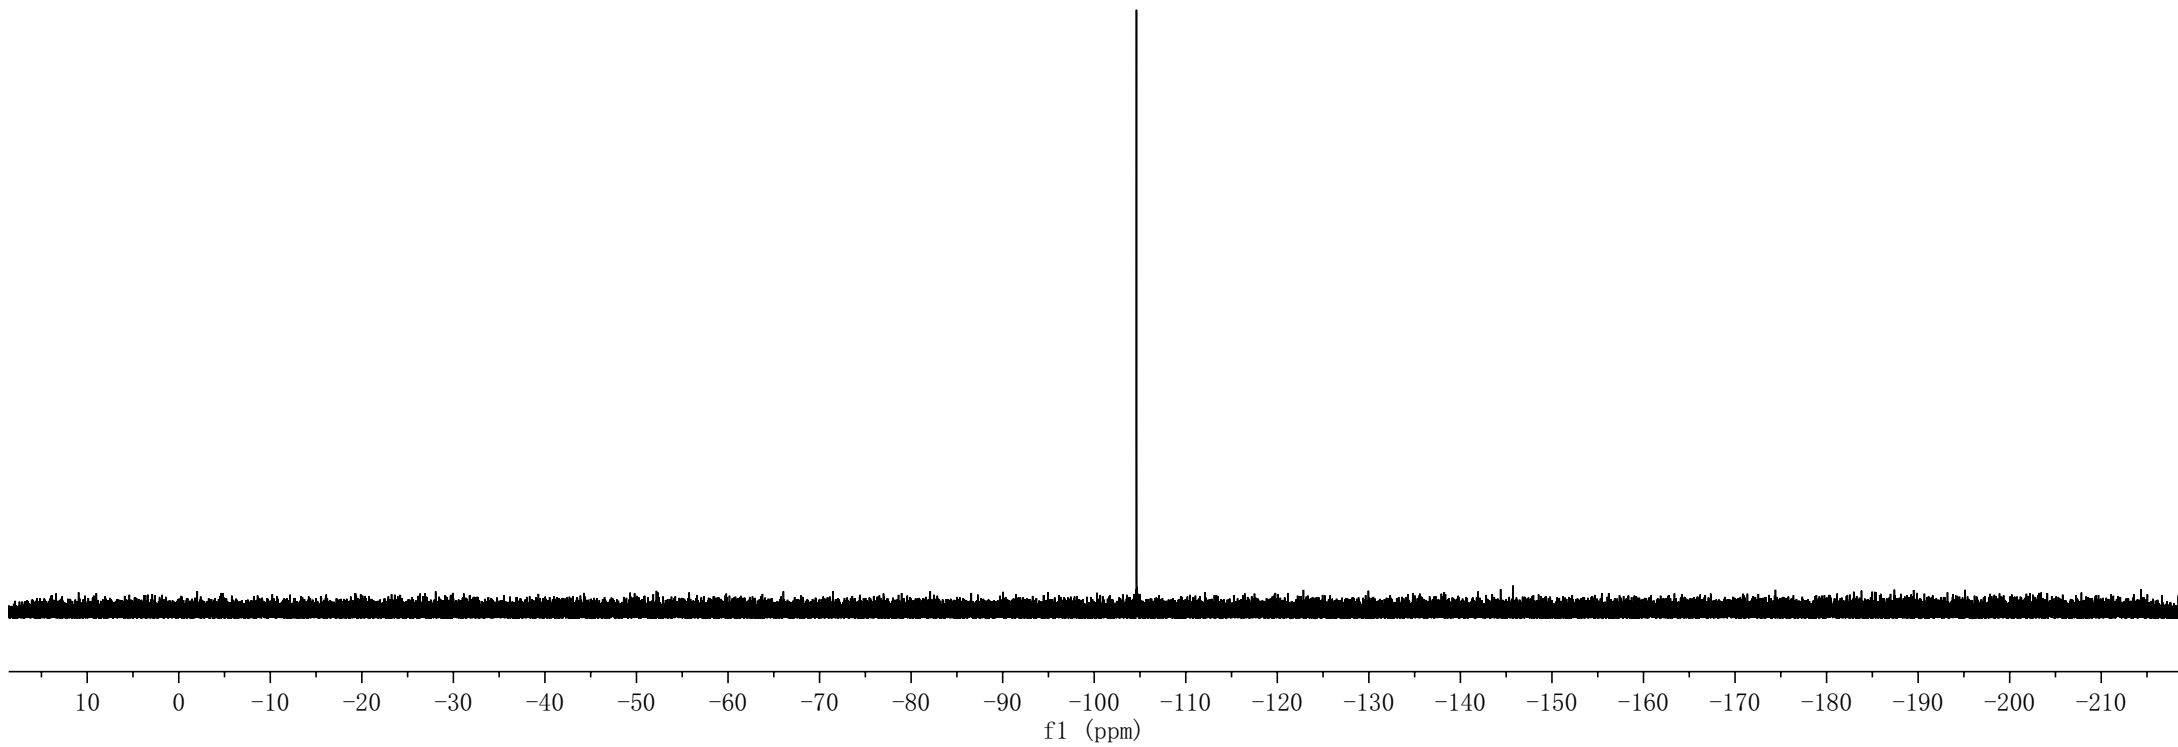

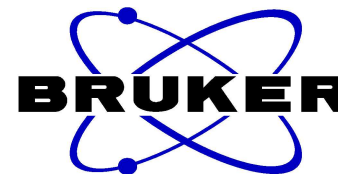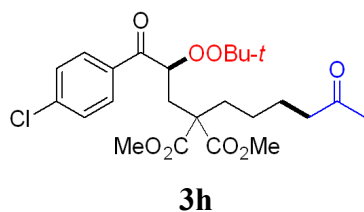

8.052  
8.038  
7.457  
7.443

5.088  
5.079  
5.076  
5.067  
3.723  
3.716  
2.459  
2.447  
2.435  
2.424  
2.416  
2.412  
2.136  
2.100  
2.092  
2.077  
2.070  
2.056  
2.048  
2.029  
2.021  
2.007  
2.000  
1.984  
1.977  
1.630  
1.618  
1.605  
1.593  
1.580  
1.254  
1.242  
1.229  
1.221  
1.208

NAME wll-547p-20210610  
 EXPNO 1  
 PROCNO 1  
 Date\_ 20210610  
 Time 17.25  
 INSTRUM spect  
 PROBHD 5 mm PABBO BB/  
 PULPROG zg30  
 TD 65536  
 SOLVENT CDC13  
 NS 8  
 DS 0  
 SWH 9615.385 Hz  
 FIDRES 0.146719 Hz  
 AQ 3.4079220 sec  
 RG 44.5  
 DW 52.000 usec  
 DE 6.50 usec  
 TE 295.6 K  
 D1 1.00000000 sec  
 TD0 1

===== CHANNEL f1 =====  
 SFO1 600.1739011 MHz  
 NUC1 1H  
 P1 9.96 usec  
 SI 65536  
 SF 600.1700053 MHz  
 WDW EM  
 SSB 0  
 LB 0.30 Hz  
 GB 0  
 PC 1.00

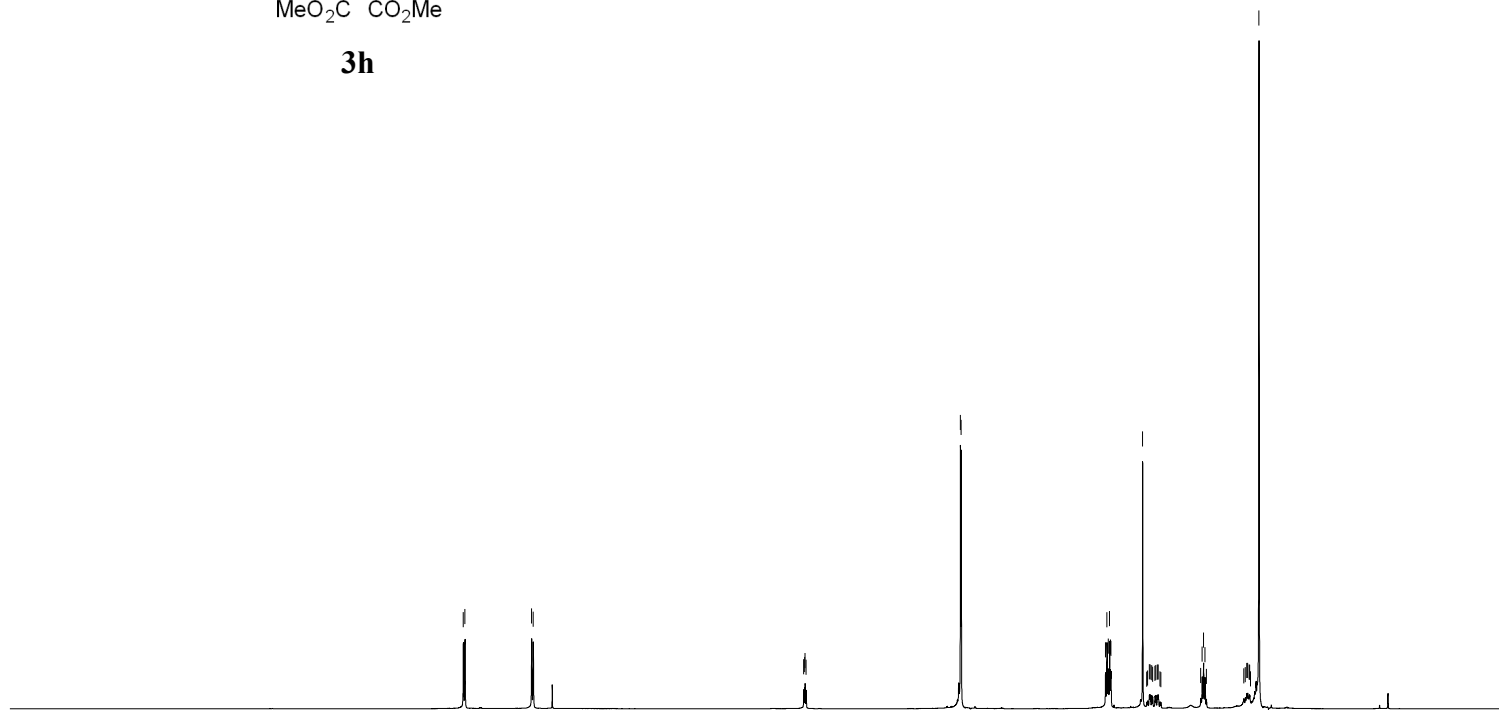

11 10 9 8 7 6 5 4 3 2 1 0 ppm

2.05  
2.09

1.00

3.04  
3.00

4.03  
3.07  
1.09  
1.07  
2.14  
1.95  
9.06

— 208.464  
 — 196.824  
 — 171.231

— 139.731  
 — 133.402  
 — 130.572  
 — 128.823

— 82.069  
 — 80.990

— 55.848  
 — 52.713  
 — 52.604  
 — 43.169  
 — 33.172  
 — 32.801  
 — 29.949  
 — 26.362  
 — 23.745

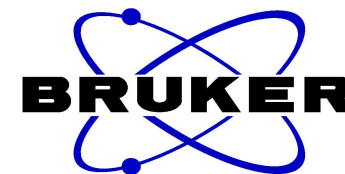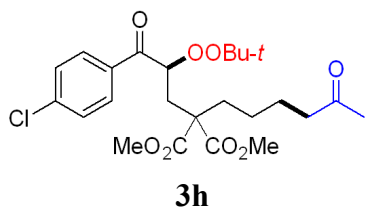

```

NAME      w11-547p-20210610
EXPNO     2
PROCNO    1
Date_     20210610
Time      23.55
INSTRUM   spect
PROBHD    5 mm PABBO BB/
PULPROG   zgpg30
TD        65536
SOLVENT   CDC13
NS        300
DS        4
SWH       36057.691 Hz
FIDRES    0.550197 Hz
AQ        0.9088159 sec
RG        190.02
DW        13.867 usec
DE        6.50 usec
TE        296.8 K
D1        2.00000000 sec
D11       0.03000000 sec
TD0       1
  
```

```

===== CHANNEL f1 =====
SFO1     150.9279571 MHz
NUC1     13C
P1       14.00 usec
SI       32768
SF       150.9128665 MHz
WDW      EM
SSB      0
LB       1.00 Hz
GB       0
PC       1.40
  
```

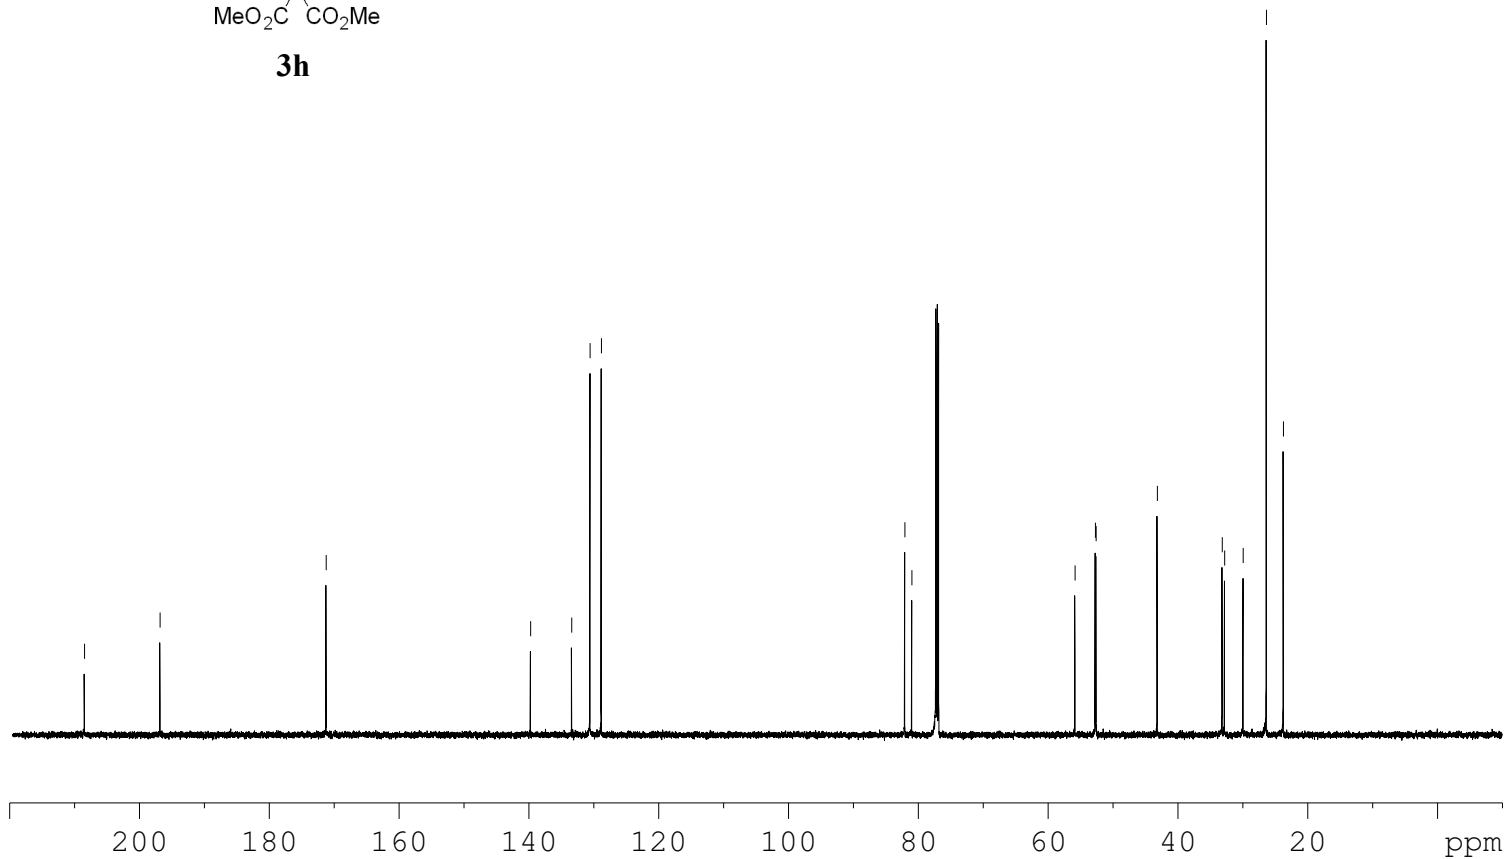

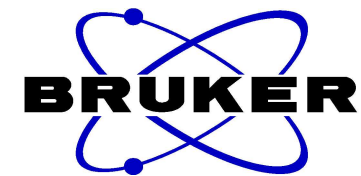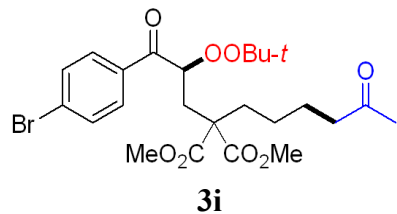

7.974  
7.960  
7.626  
7.611

5.082  
5.073  
5.069  
5.061  
3.721  
3.716  
2.458  
2.446  
2.433  
2.420  
2.412  
2.407  
2.136  
2.098  
2.090  
2.074  
2.067  
2.054  
2.046  
2.026  
2.018  
2.005  
1.997  
1.982  
1.974  
1.629  
1.616  
1.604  
1.591  
1.579  
1.260  
1.254  
1.249  
1.240  
1.231  
1.227

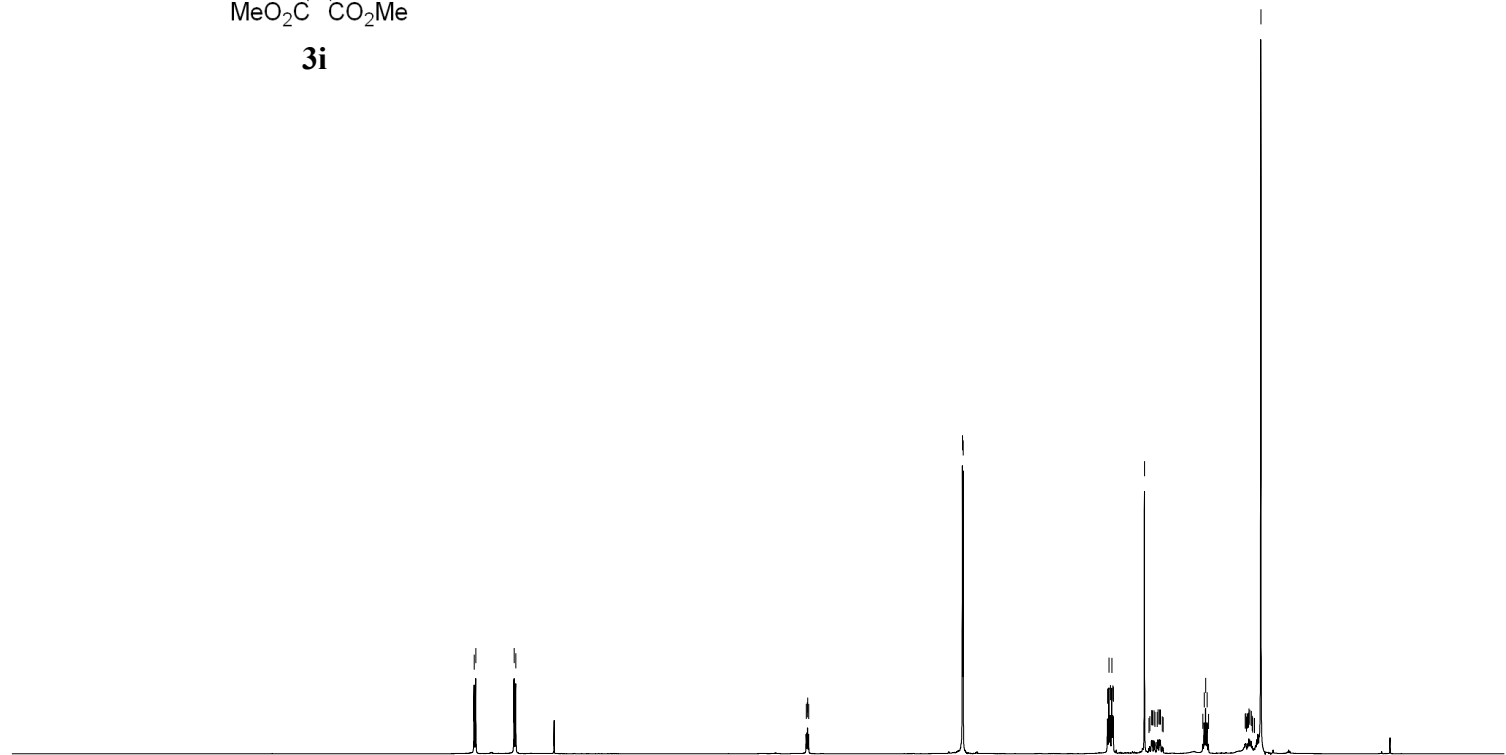

NAME w11-553p-20210610  
 EXPNO 1  
 PROCNO 1  
 Date\_ 20210611  
 Time 5.20  
 INSTRUM spect  
 PROBHD 5 mm PABBO BB/  
 PULPROG zg30  
 TD 65536  
 SOLVENT CDCl3  
 NS 8  
 DS 0  
 SWH 9615.385 Hz  
 FIDRES 0.146719 Hz  
 AQ 3.4079220 sec  
 RG 44.5  
 DW 52.000 usec  
 DE 6.50 usec  
 TE 295.6 K  
 D1 1.00000000 sec  
 TD0 1

===== CHANNEL f1 =====  
 SFO1 600.1739011 MHz  
 NUC1 1H  
 P1 9.96 usec  
 SI 65536  
 SF 600.1700061 MHz  
 WDW EM  
 SSB 0  
 LB 0.30 Hz  
 GB 0  
 PC 1.00

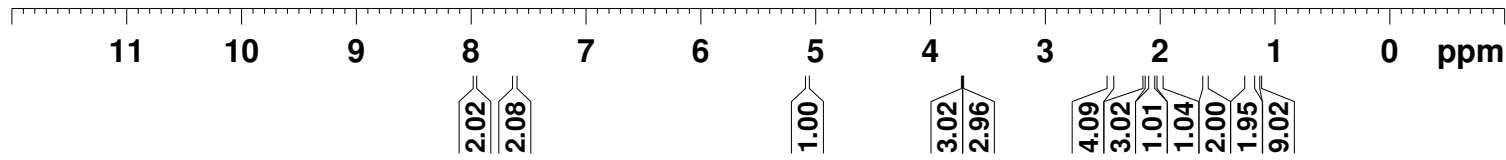

2.02  
2.08  
1.00  
3.02  
2.96  
4.09  
3.02  
1.01  
1.04  
2.00  
1.95  
9.02

— 208.471

— 197.032

— 171.225

133.803  
131.820  
130.667  
128.526

82.068  
81.006

55.842  
52.718  
52.606  
43.169  
33.164  
32.806  
29.956  
26.362  
23.743

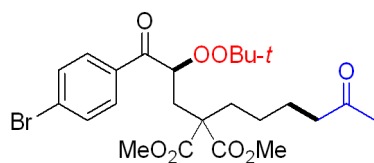

**3i**

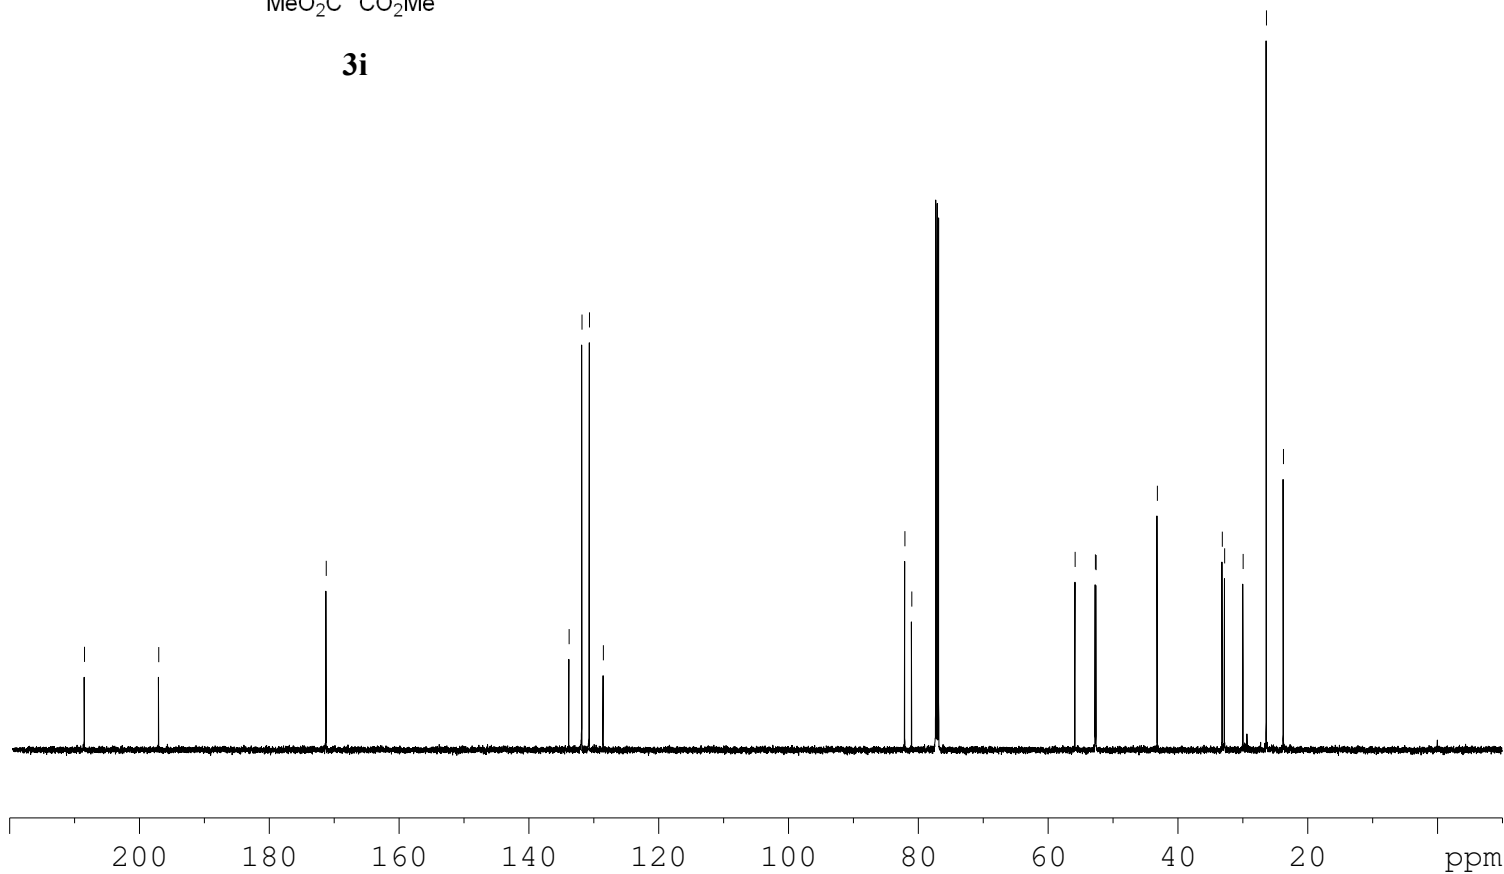

NAME w11-553p-20210610  
EXPNO 2  
PROCNO 1  
Date\_ 20210611  
Time 5.36  
INSTRUM spect  
PROBHD 5 mm PABBO BB/  
PULPROG zgpg30  
TD 65536  
SOLVENT CDC13  
NS 300  
DS 4  
SWH 36057.691 Hz  
FIDRES 0.550197 Hz  
AQ 0.9088159 sec  
RG 190.02  
DW 13.867 usec  
DE 6.50 usec  
TE 296.7 K  
D1 2.00000000 sec  
D11 0.03000000 sec  
TD0 1

==== CHANNEL f1 =====  
SFO1 150.9279571 MHz  
NUC1 13C  
P1 14.00 usec  
SI 32768  
SF 150.9128665 MHz  
WDW EM  
SSB 0  
LB 1.00 Hz  
GB 0  
PC 1.40

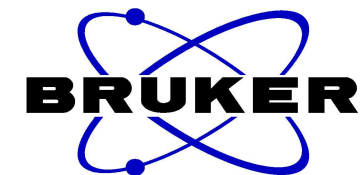

NAME w11-557p-20210618  
EXPNO 1  
PROCNO 1  
Date\_ 20210618  
Time 10.01  
INSTRUM spect  
PROBHD 5 mm PABBO BB/  
PULPROG zg30  
TD 65536  
SOLVENT CDC13  
NS 8  
DS 0  
SWH 9615.385 Hz  
FIDRES 0.146719 Hz  
AQ 3.4079220 sec  
RG 62.22  
DW 52.000 usec  
DE 6.50 usec  
TE 295.2 K  
D1 1.00000000 sec  
TD0 1

==== CHANNEL f1 =====  
SFO1 600.1739011 MHz  
NUC1 1H  
P1 9.96 usec  
SI 65536  
SF 600.1700077 MHz  
WDW EM  
SSB 0  
LB 0.30 Hz  
GB 0  
PC 1.00

8.213  
8.200  
7.751  
7.737

5.120  
5.113  
5.107  
5.099  
3.730  
3.723  
2.473  
2.465  
2.452  
2.440  
2.427  
2.415  
2.401  
2.138  
2.107  
2.099  
2.083  
2.076  
2.063  
2.055  
2.038  
2.030  
2.017  
2.010  
1.994  
1.986  
1.637  
1.624  
1.612  
1.599  
1.587  
1.256  
1.248  
1.235  
1.226

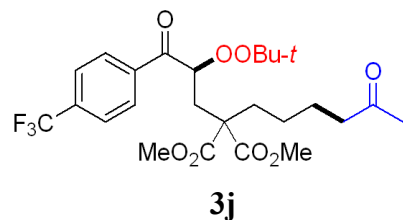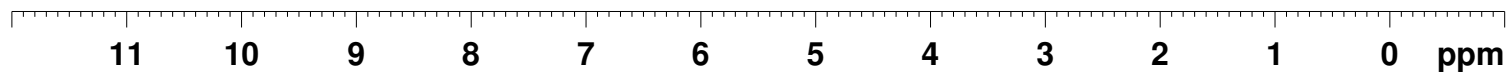

2.00  
2.04

0.99

3.19  
2.97

4.05  
2.95  
1.04  
1.05  
2.13  
1.98  
9.03



— 208.432

— 197.241

— 171.205

137.859  
134.510  
134.293  
134.078  
129.449  
125.512  
125.489  
124.522  
122.717  
82.309  
81.127  
55.834  
52.744  
52.638  
43.148  
33.077  
32.847  
29.947  
26.324  
23.756  
23.729  
125.534  
125.462  
126.330  
120.919  
134.731

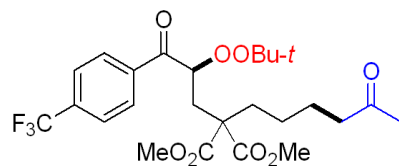

**3j**

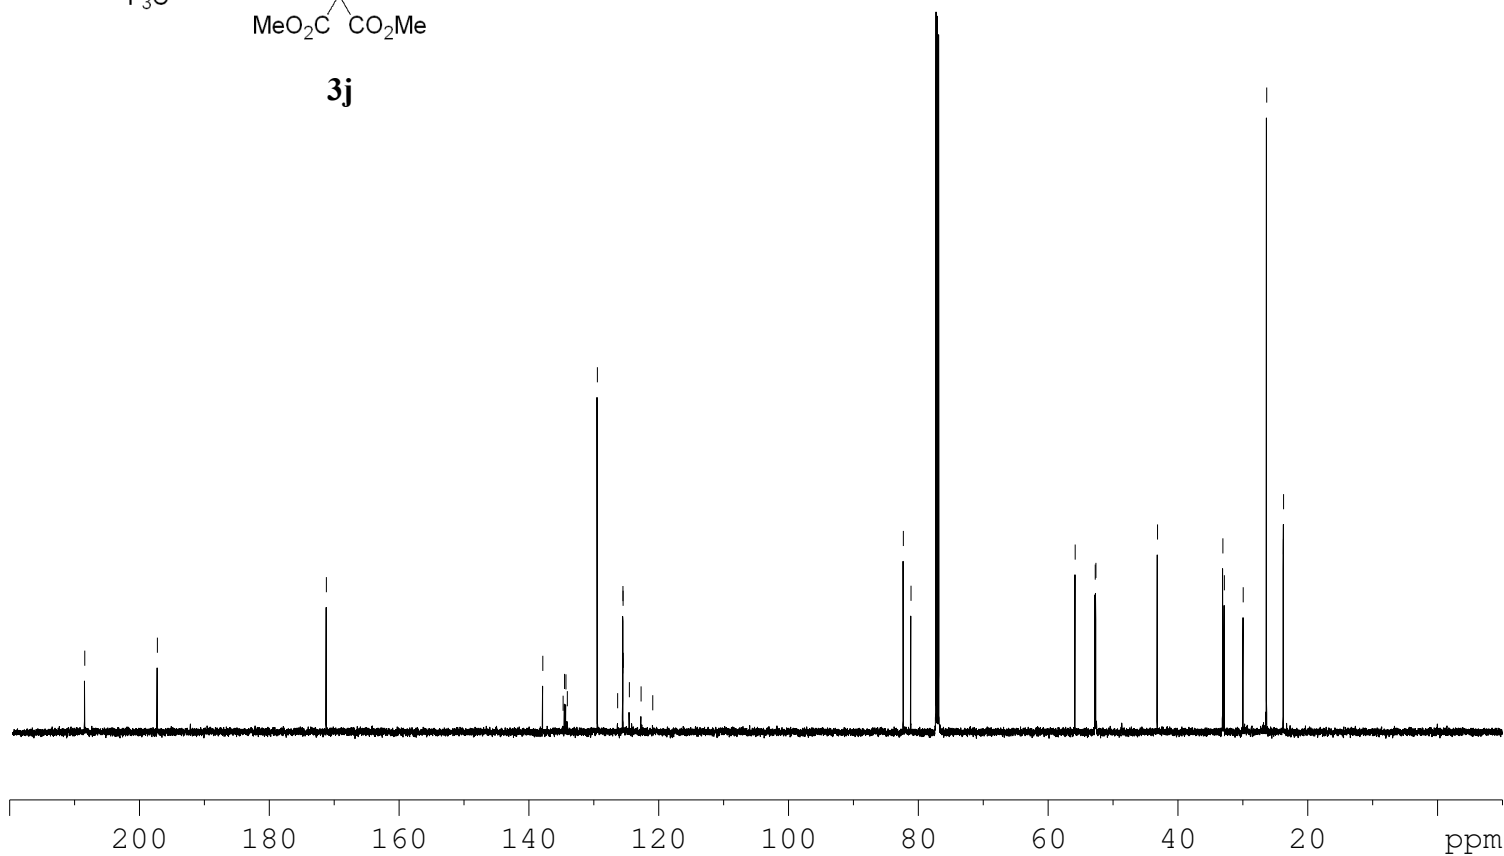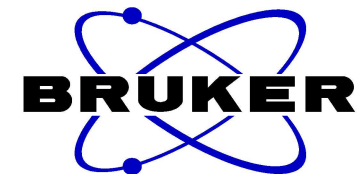

NAME w11-557p-20210618  
EXPNO 2  
PROCNO 1  
Date\_ 20210618  
Time 12.52  
INSTRUM spect  
PROBHD 5 mm PABBO BB/  
PULPROG zgpg30  
TD 65536  
SOLVENT CDCl3  
NS 300  
DS 4  
SWH 36057.691 Hz  
FIDRES 0.550197 Hz  
AQ 0.9088159 sec  
RG 190.02  
DW 13.867 usec  
DE 6.50 usec  
TE 296.9 K  
D1 2.0000000 sec  
D11 0.0300000 sec  
TD0 1

===== CHANNEL f1 =====  
SFO1 150.9279571 MHz  
NUC1 13C  
P1 14.00 usec  
SI 32768  
SF 150.9128665 MHz  
WDW EM  
SSB 0  
LB 1.00 Hz  
GB 0  
PC 1.40

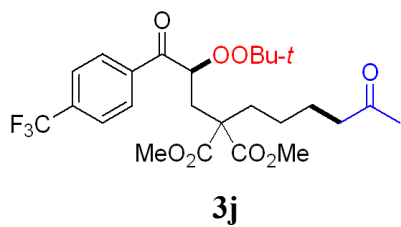

--63.180

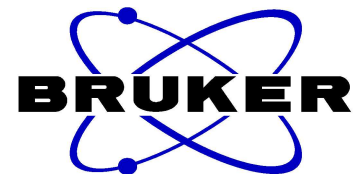

```

NAME      w11-557p-20210730
EXPNO     1
PROCNO    1
Date_     20210730
Time      10.52
INSTRUM   spect
PROBHD    5 mm PABBO BB/
PULPROG   zgfhigqn.2
TD         131072
SOLVENT   CDCl3
NS         16
DS         4
SWH       133928.578 Hz
FIDRES    1.021794 Hz
AQ        0.4893855 sec
RG         17.32
DW         3.733 usec
DE         6.50 usec
TE         298.2 K
D1         1.00000000 sec
D11        0.03000000 sec
D12        0.00002000 sec
TD0        1
  
```

```

===== CHANNEL f1 =====
SFO1      564.6675534 MHz
NUC1       19F
P1         25.77 usec
SI         65536
SF         564.7240258 MHz
WDW        EM
SSB        0
LB         0.30 Hz
GB         0
PC         1.00
  
```

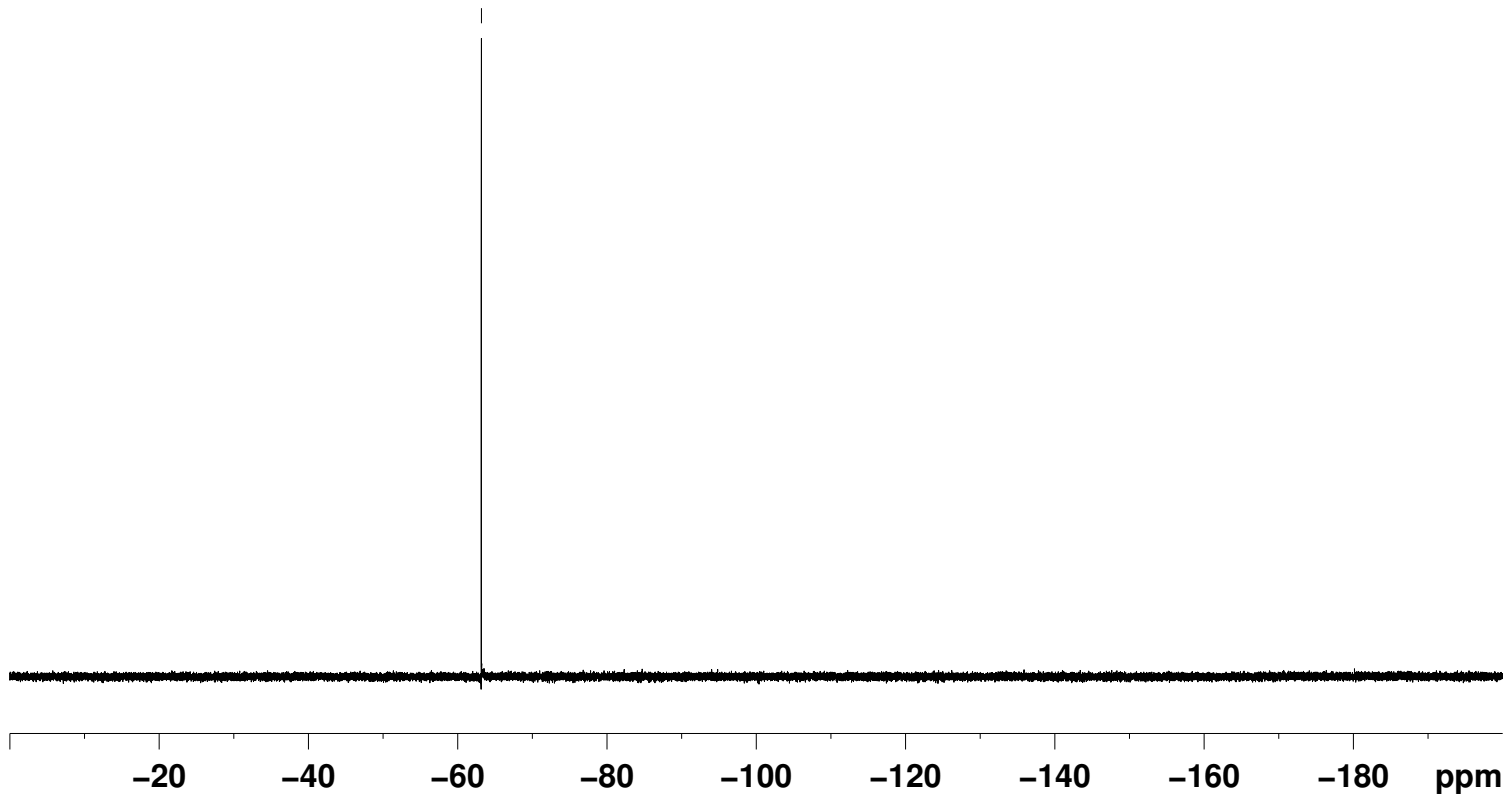

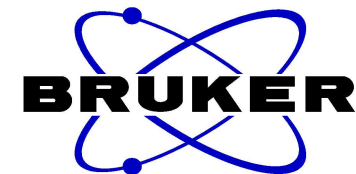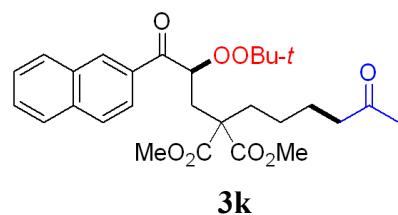

8.678  
8.102  
8.099  
8.087  
8.085  
7.992  
7.979  
7.915  
7.900  
7.890  
7.876  
7.628  
7.626  
7.616  
7.615  
7.603  
7.601  
7.574  
7.572  
7.561  
7.549  
7.547  
5.300  
5.291  
5.288  
5.279  
3.739  
3.717  
2.536  
2.510  
2.506  
2.497  
2.480  
2.447  
2.435  
2.423  
2.156  
2.138  
2.126  
2.117  
2.115  
2.102  
2.094  
2.074  
2.066  
2.053  
2.045  
2.030  
2.022  
1.644  
1.631  
1.618  
1.607  
1.594  
1.272  
1.268  
1.255

NAME wll-551p-20210610  
EXPNO 1  
PROCNO 1  
Date\_ 20210611  
Time 4.35  
INSTRUM spect  
PROBHD 5 mm PABBO BB/  
PULPROG zg30  
TD 65536  
SOLVENT CDCl3  
NS 8  
DS 0  
SWH 9615.385 Hz  
FIDRES 0.146719 Hz  
AQ 3.4079220 sec  
RG 87.54  
DW 52.000 usec  
DE 6.50 usec  
TE 295.4 K  
D1 1.00000000 sec  
TD0 1

==== CHANNEL f1 =====  
SFO1 600.1739011 MHz  
NUC1 1H  
P1 9.96 usec  
SI 65536  
SF 600.1700132 MHz  
WDW EM  
SSB 0  
LB 0.30 Hz  
GB 0  
PC 1.00

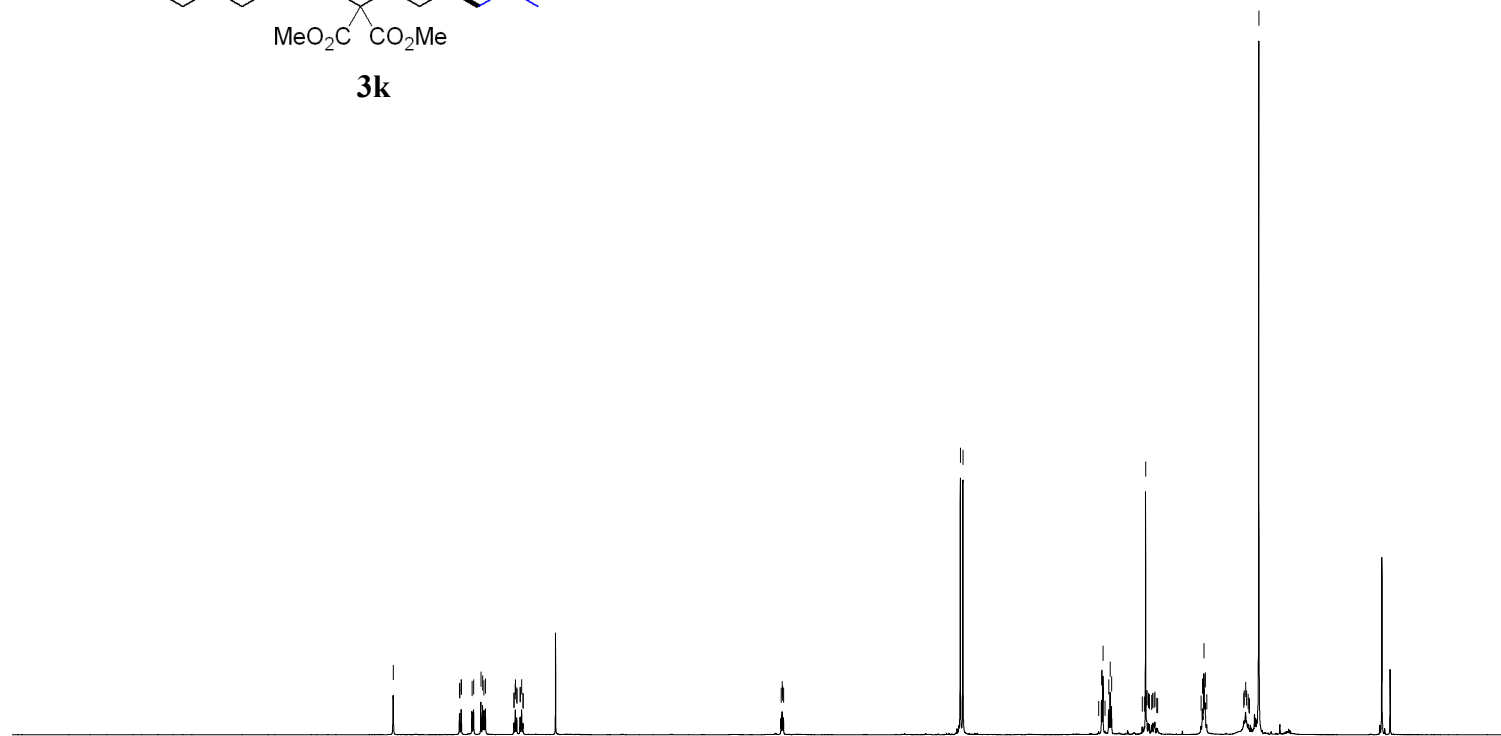

1.00  
1.02  
1.02  
2.15  
1.04  
1.06  
1.00  
2.99  
3.00  
2.09  
2.10  
4.11  
1.14  
3.96  
2.14  
9.09

— 208.542

— 197.764

171.345  
171.302

135.689  
132.486  
132.424  
131.009  
129.783  
128.624  
128.317  
127.771  
126.713  
124.641

81.748  
80.874

55.956  
52.697  
52.592  
43.224  
33.361  
32.842  
29.936  
26.418  
23.790

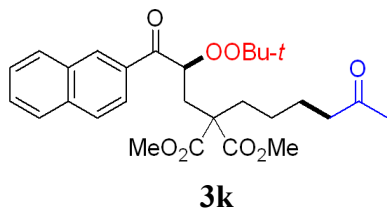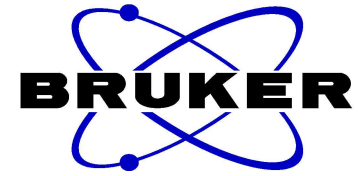

```

NAME      w11-551p-20210610
EXPNO     2
PROCNO    1
Date_     20210611
Time      4.56
INSTRUM   spect
PROBHD    5 mm PABBO BB/
PULPROG   zgpg30
TD         65536
SOLVENT   CDC13
NS         400
DS         4
SWH        36057.691 Hz
FIDRES     0.550197 Hz
AQ         0.9088159 sec
RG         190.02
DW         13.867 usec
DE         6.50 usec
TE         296.7 K
D1         2.0000000 sec
D11        0.0300000 sec
TD0        1
  
```

```

===== CHANNEL f1 =====
SFO1      150.9279571 MHz
NUC1       13C
P1         14.00 usec
SI         32768
SF         150.9128679 MHz
WDW        EM
SSB        0
LB         1.00 Hz
GB         0
PC         1.40
  
```

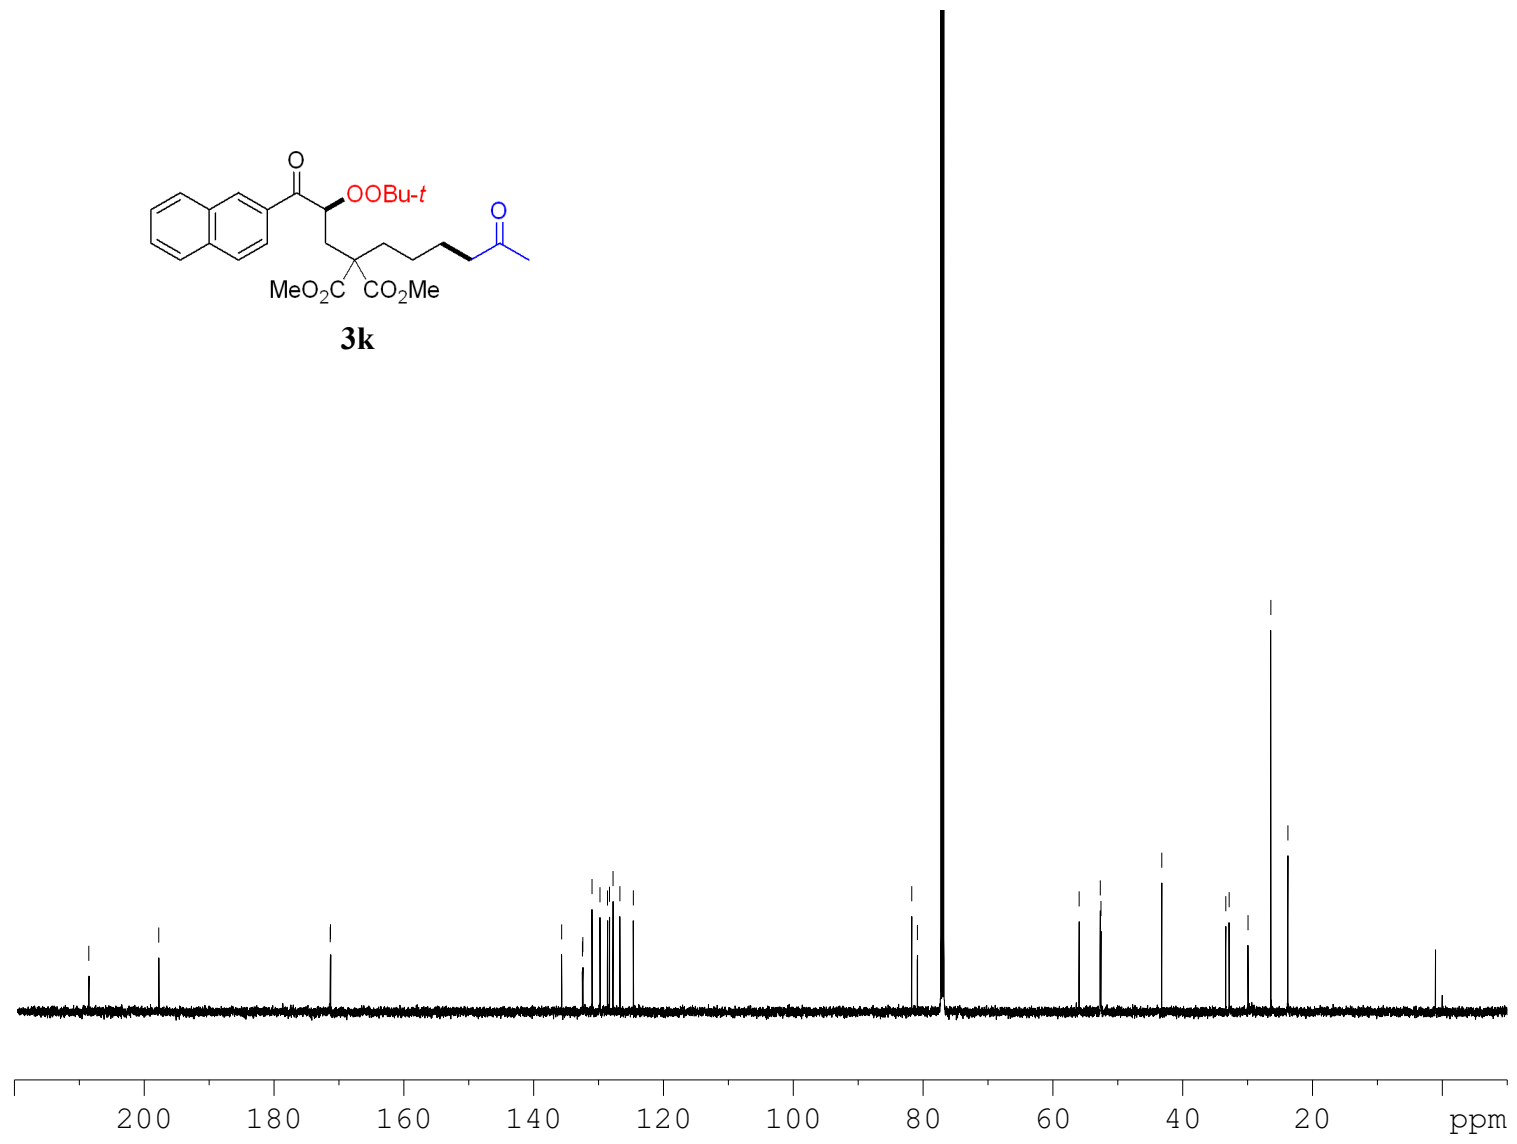

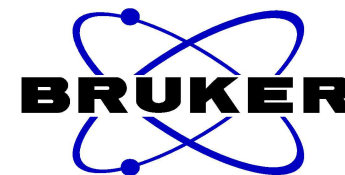

8.009  
8.008  
8.003  
8.002  
7.687  
7.686  
7.679  
7.678  
7.270  
7.169  
7.163  
7.162  
7.155  
4.890  
4.884  
4.874  
4.868  
3.749  
3.718  
2.490  
2.474  
2.464  
2.451  
2.439  
2.421  
2.415  
2.395  
2.389  
2.137  
2.128  
2.119  
2.107  
2.104  
2.097  
2.084  
2.076  
2.034  
2.026  
2.013  
2.011  
2.005  
1.990  
1.982  
1.624  
1.611  
1.599  
1.587  
1.279  
1.273  
1.268  
1.258

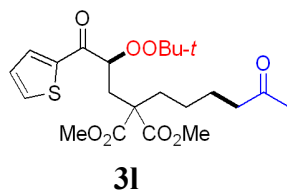

NAME w11-558p-20210618  
EXPNO 1  
PROCNO 1  
Date\_ 20210618  
Time 10.05  
INSTRUM spect  
PROBHD 5 mm PABBO BB/  
PULPROG zg30  
TD 65536  
SOLVENT CDCl3  
NS 8  
DS 0  
SWH 9615.385 Hz  
FIDRES 0.146719 Hz  
AQ 3.4079220 sec  
RG 76.92  
DW 52.000 usec  
DE 6.50 usec  
TE 295.2 K  
D1 1.00000000 sec  
TD0 1

===== CHANNEL f1 =====  
SFO1 600.1739011 MHz  
NUC1 1H  
P1 9.96 usec  
SI 65536  
SF 600.1700100 MHz  
WDW EM  
SSB 0  
LB 0.30 Hz  
GB 0  
PC 1.00

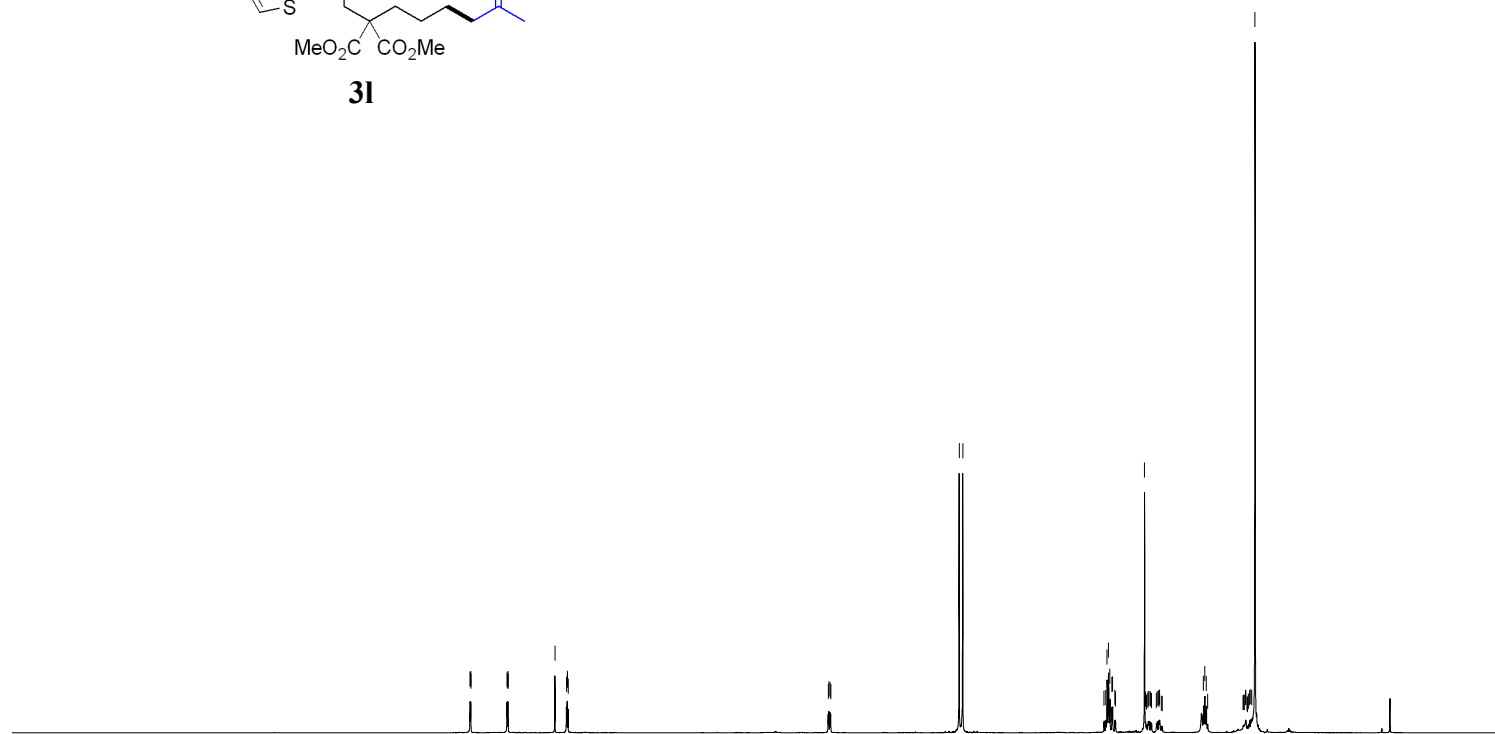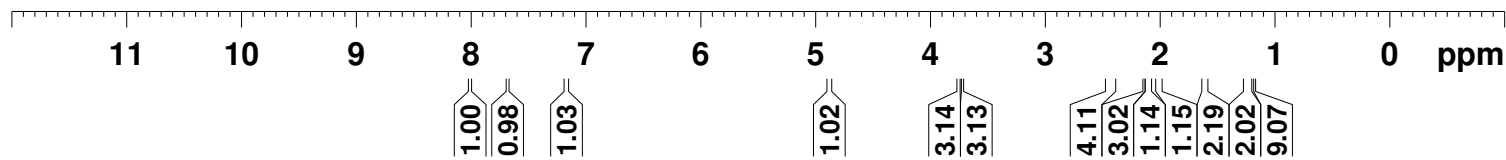

— 208.522

— 191.445

< 171.187  
< 171.173

< 140.672  
< 134.267  
< 133.714  
< 128.072

< 83.330  
< 81.188

< 55.778  
< 52.736  
< 52.603  
< 43.226  
< 33.790  
< 32.450  
< 29.956  
< 26.412  
< 23.771  
< 23.748

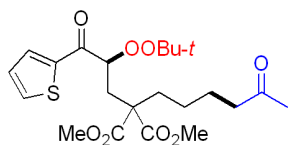

**31**

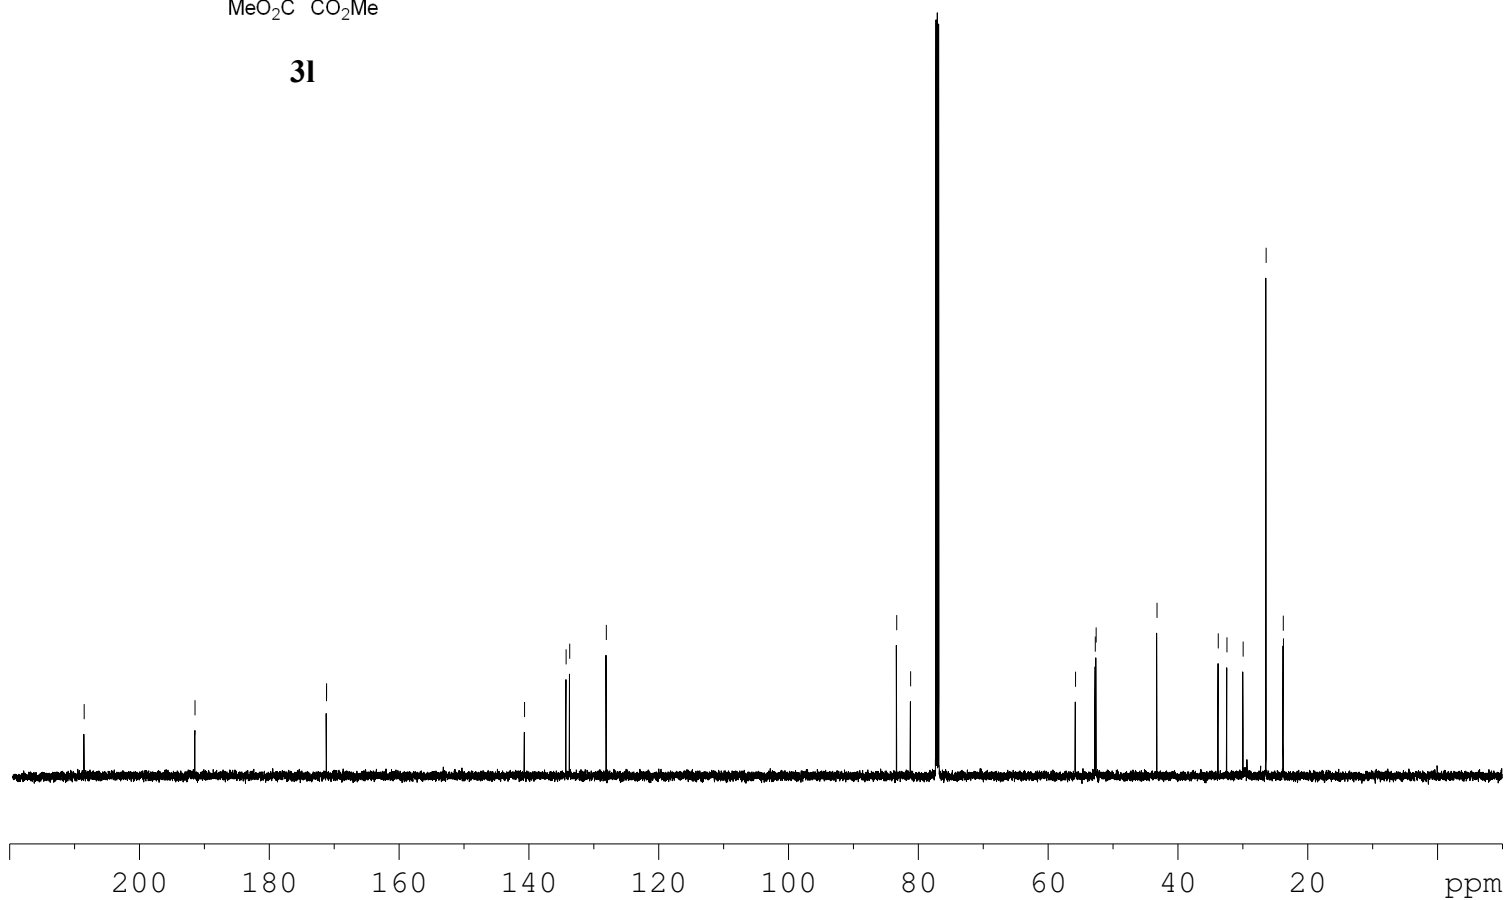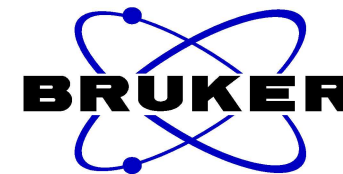

```

NAME      w11-558p-20210618
EXPNO     2
PROCNO    1
Date_     20210618
Time      13.05
INSTRUM   spect
PROBHD    5 mm PABBO BB/
PULPROG   zgpg30
TD        65536
SOLVENT   CDC13
NS        200
DS        4
SWH       36057.691 Hz
FIDRES    0.550197 Hz
AQ        0.9088159 sec
RG        190.02
DW        13.867 usec
DE        6.50 usec
TE        296.9 K
D1        2.0000000 sec
D11       0.03000000 sec
TD0       1

```

```

===== CHANNEL f1 =====
SFO1     150.9279571 MHz
NUC1     13C
P1       14.00 usec
SI       32768
SF       150.9128665 MHz
WDW      EM
SSB      0
LB       1.00 Hz
GB       0
PC       1.40

```

7.297  
7.285  
7.272  
7.219  
7.206  
7.191  
7.179  
4.258  
4.248  
4.246  
4.237  
3.717  
3.709  
3.082  
3.072  
3.068  
3.052  
3.040  
2.945  
2.937  
2.930  
2.926  
2.921  
2.913  
2.905  
2.897  
2.889  
2.880  
2.449  
2.447  
2.437  
2.425  
2.158  
2.148  
2.146  
2.128  
2.040  
2.032  
2.027  
2.022  
2.013  
2.003  
1.958  
1.948  
1.939  
1.935  
1.930  
1.921  
1.906  
1.611  
1.606  
1.599  
1.593  
1.587  
1.581  
1.574  
1.569  
1.562  
1.556  
1.186  
1.153  
1.150  
1.140  
1.127  
1.115  
1.111

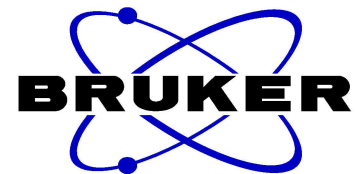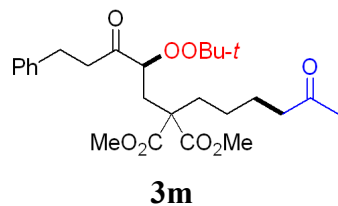

NAME w11-559p-20210618  
 EXPNO 1  
 PROCNO 1  
 Date\_ 20210618  
 Time 10.09  
 INSTRUM spect  
 PROBHD 5 mm PABBO BB/  
 PULPROG zg30  
 TD 65536  
 SOLVENT CDCl3  
 NS 8  
 DS 0  
 SWH 9615.385 Hz  
 FIDRES 0.146719 Hz  
 AQ 3.4079220 sec  
 RG 50.85  
 DW 52.000 usec  
 DE 6.50 usec  
 TE 295.3 K  
 D1 1.00000000 sec  
 TD0 1

===== CHANNEL f1 =====  
 SFO1 600.1739011 MHz  
 NUC1 1H  
 P1 9.96 usec  
 SI 65536  
 SF 600.1700110 MHz  
 WDW EM  
 SSB 0  
 LB 0.30 Hz  
 GB 0  
 PC 1.00

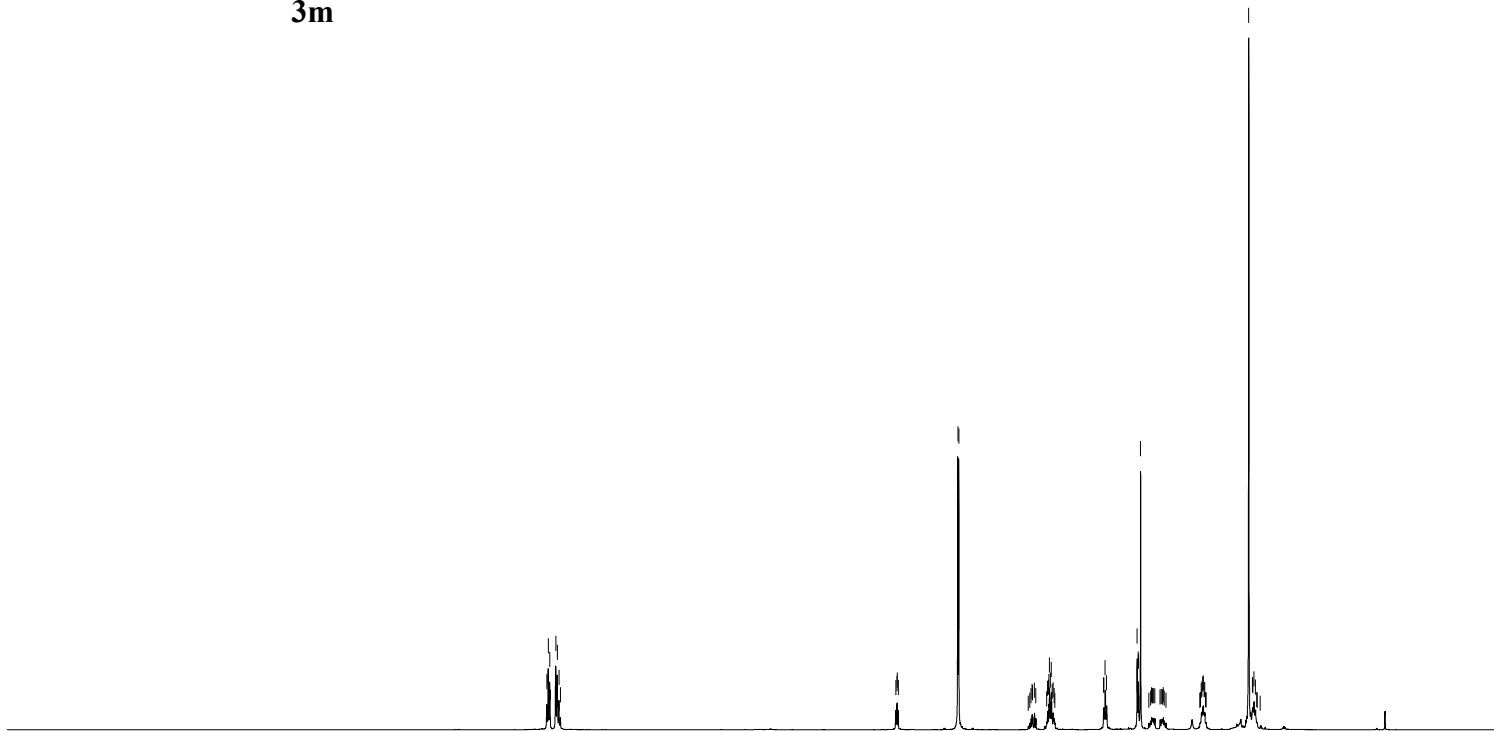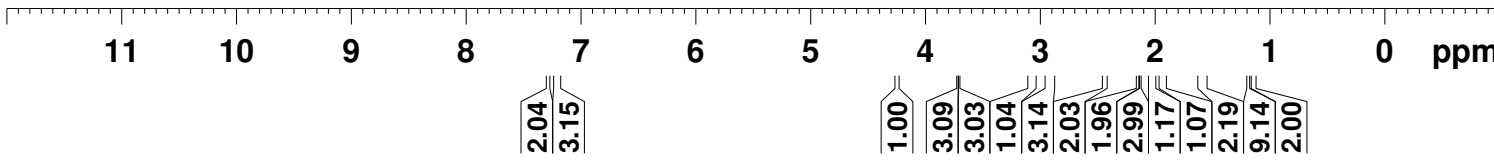

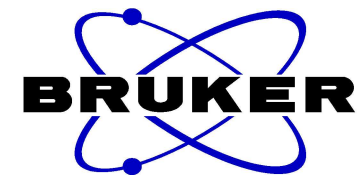

NAME wll-559p-20210618  
EXPNO 2  
PROCNO 1  
Date\_ 20210618  
Time 13.19  
INSTRUM spect  
PROBHD 5 mm PABBO BB/  
PULPROG zgpg30  
TD 65536  
SOLVENT CDC13  
NS 200  
DS 4  
SWH 36057.691 Hz  
FIDRES 0.550197 Hz  
AQ 0.9088159 sec  
RG 190.02  
DW 13.867 usec  
DE 6.50 usec  
TE 296.9 K  
D1 2.0000000 sec  
D11 0.0300000 sec  
TD0 1

==== CHANNEL f1 =====  
SFO1 150.9279571 MHz  
NUC1 13C  
P1 14.00 usec  
SI 32768  
SF 150.9128665 MHz  
WDW EM  
SSB 0  
LB 1.00 Hz  
GB 0  
PC 1.40

210.201  
208.484

171.149  
171.100

141.284  
128.436  
128.392  
126.021

84.649  
81.138

55.570  
52.753  
52.605  
43.219  
38.679  
32.477  
32.063  
29.927  
29.328  
29.151  
26.388  
23.751  
23.602

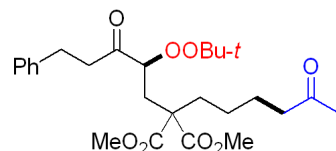

3m

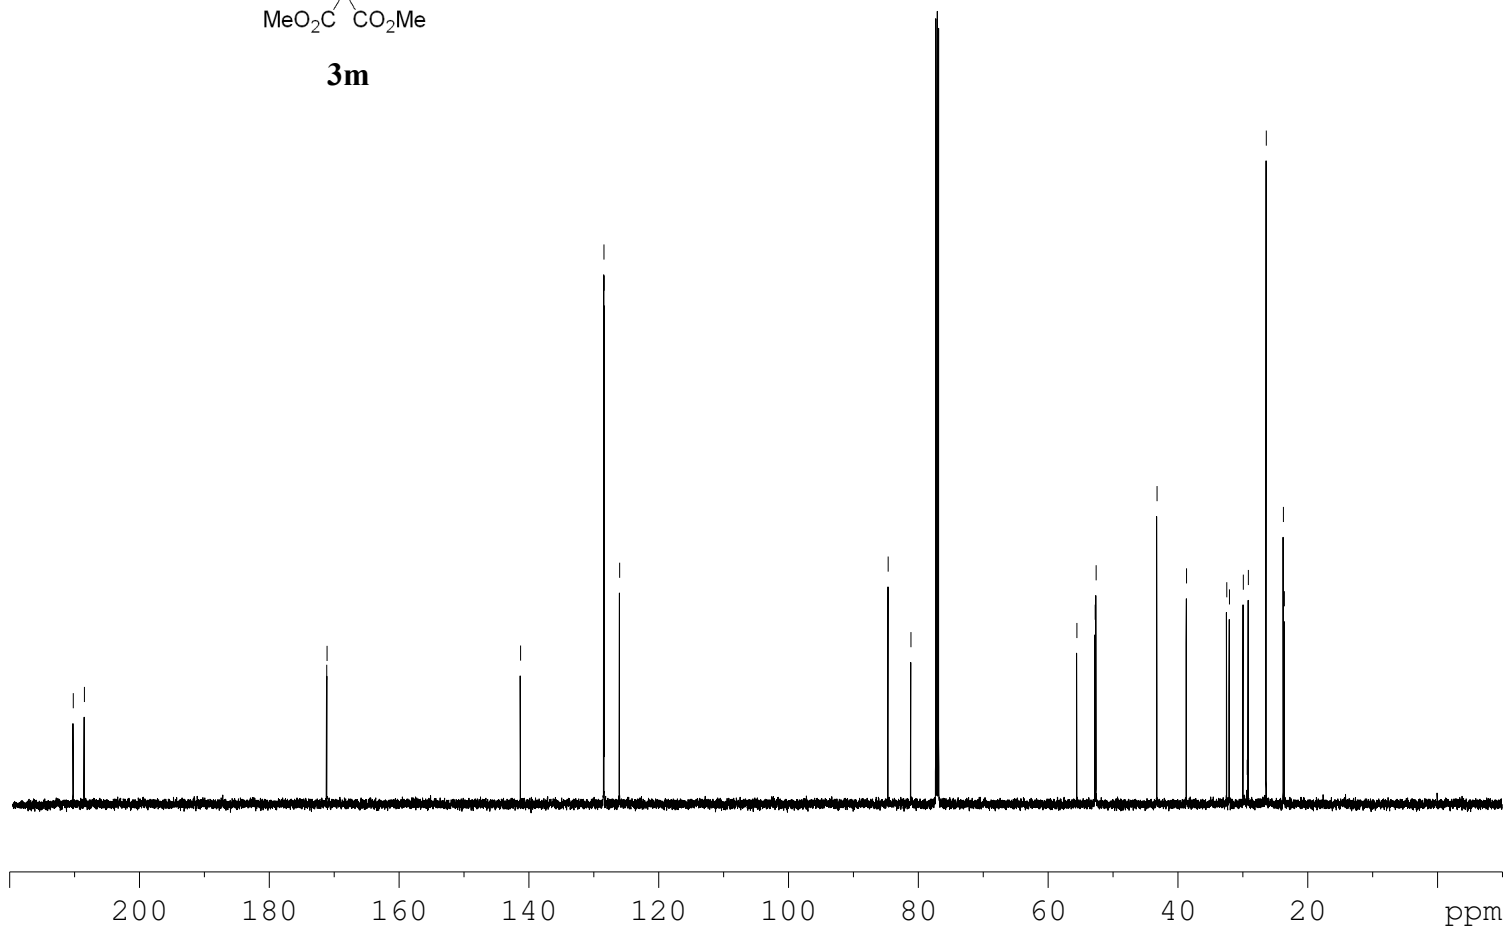



4.349  
4.342  
4.335  
4.328  
3.735  
3.724  
2.878  
2.873  
2.865  
2.859  
2.854  
2.846  
2.841  
2.455  
2.443  
2.431  
2.238  
2.219  
2.215  
2.212  
2.201  
2.176  
2.131  
2.059  
2.051  
2.036  
2.028  
2.015  
2.007  
1.972  
1.964  
1.951  
1.943  
1.928  
1.920  
1.853  
1.836  
1.818  
1.799  
1.784  
1.779  
1.619  
1.617  
1.605  
1.593  
1.581  
1.569  
1.403  
1.383  
1.364  
1.341  
1.324  
1.310  
1.307  
1.291  
1.272  
1.255  
1.201  
1.181  
1.172  
1.166  
1.160  
1.147  
1.139  
1.126  
1.094

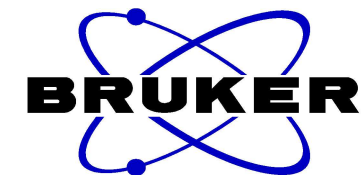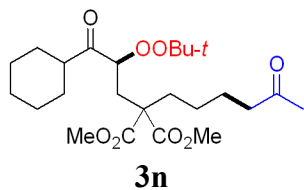

```

NAME      wll-556p-20210618
EXPNO     1
PROCNO    1
Date_     20210618
Time      9.57
INSTRUM   spect
PROBHD    5 mm PABBO BB/
PULPROG   zg30
TD         65536
SOLVENT   CDC13
NS         8
DS         0
SWH       9615.385 Hz
FIDRES    0.146719 Hz
AQ         3.4079220 sec
RG         56.75
DW         52.000 usec
DE         6.50 usec
TE         295.2 K
D1         1.00000000 sec
TD0        1
  
```

```

===== CHANNEL f1 =====
SFO1      600.1739011 MHz
NUC1       1H
P1         9.96 usec
SI         65536
SF         600.1700078 MHz
WDW        EM
SSB        0
LB         0.30 Hz
GB         0
PC         1.00
  
```

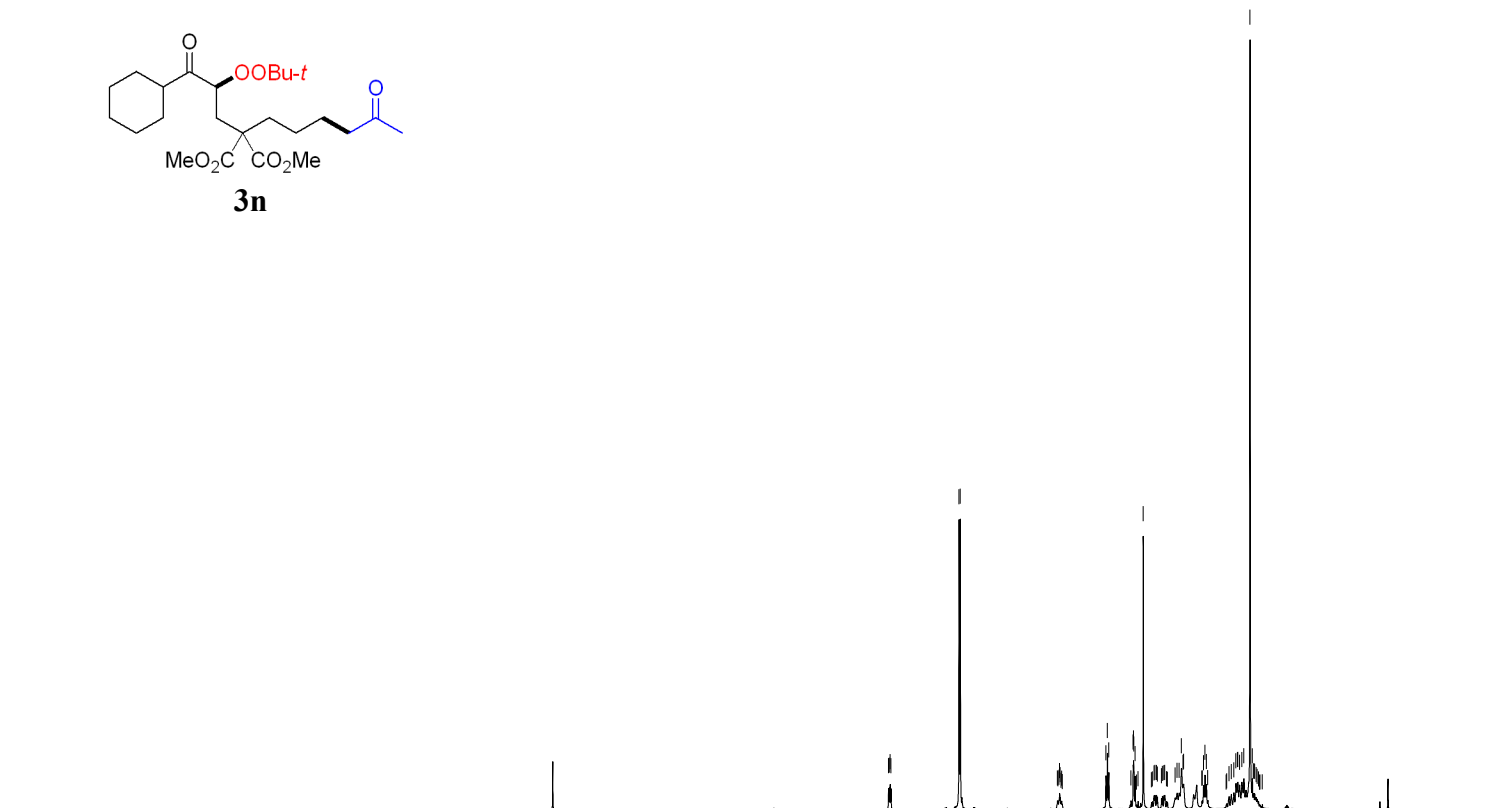

1.00  
3.03  
2.96  
1.02  
2.05  
2.09  
3.02  
1.03  
1.03  
4.04  
2.00  
6.07  
9.13  
1.97

— 213.619  
— 208.520

< 171.304  
< 171.254

83.345  
80.787

55.783  
52.698  
52.580  
45.669  
43.242  
32.517  
29.928  
29.362  
28.184  
26.418  
25.839  
25.532  
23.781  
23.656

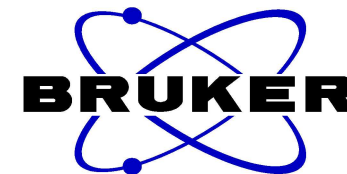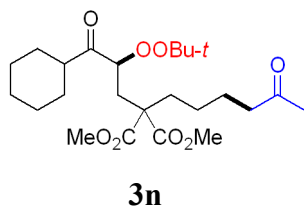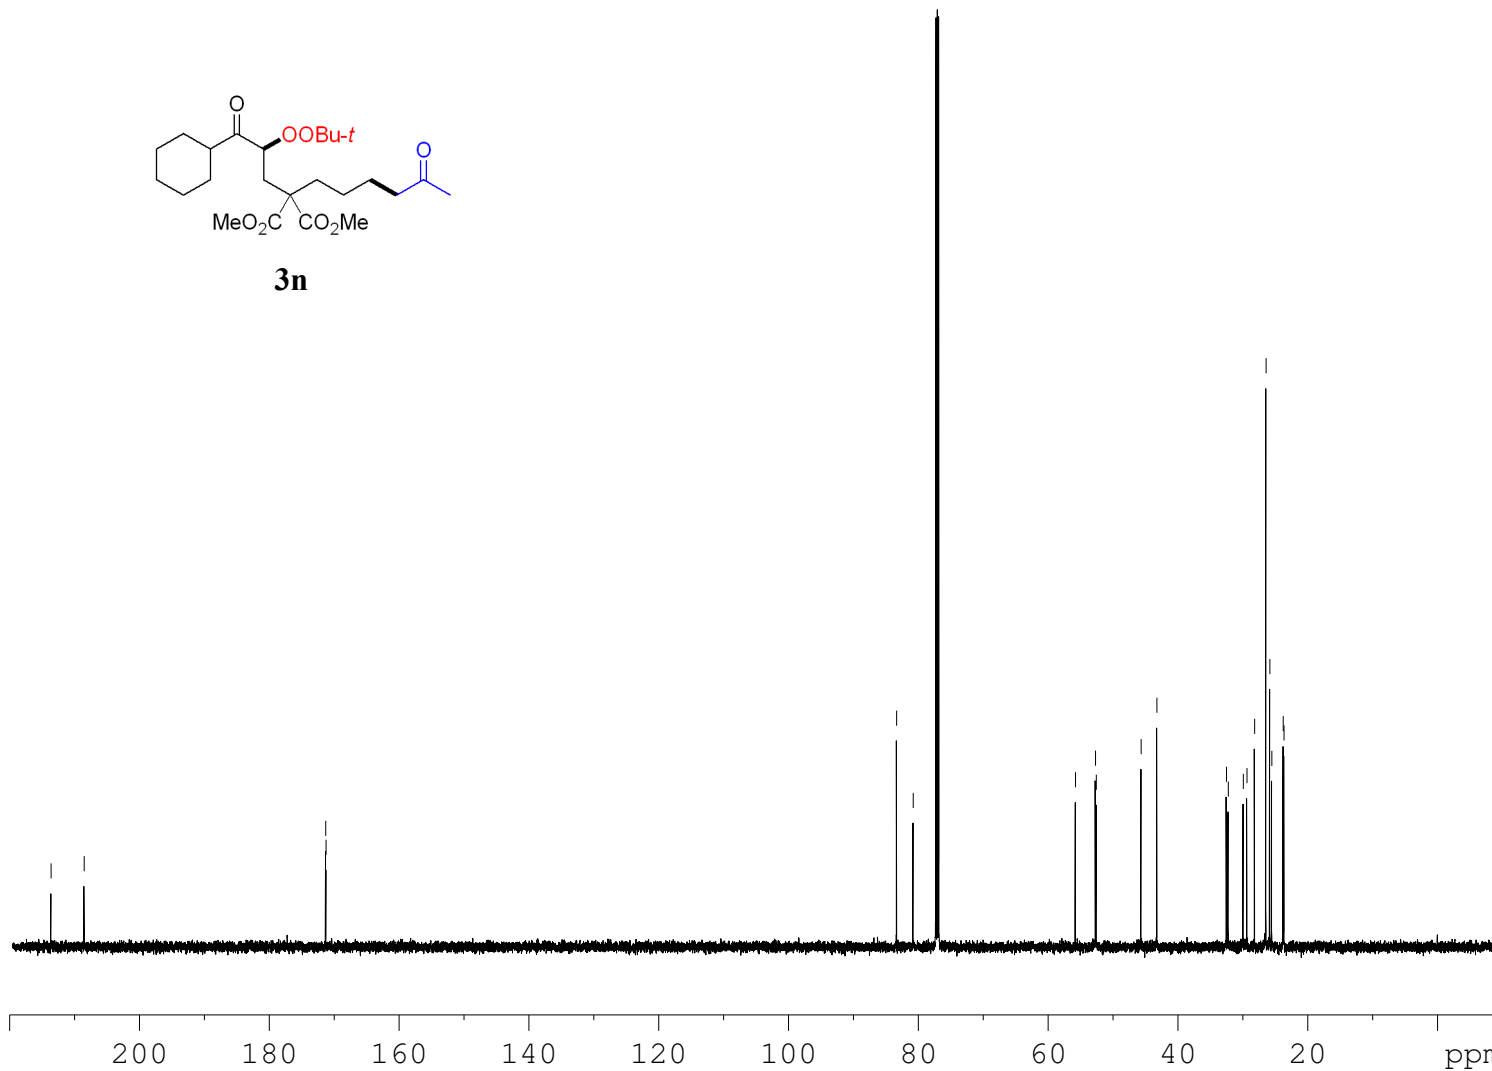

NAME w11-556p-20210618  
EXPNO 2  
PROCNO 1  
Date\_ 20210618  
Time 12.33  
INSTRUM spect  
PROBHD 5 mm PABBO BB/  
PULPROG zgpg30  
TD 65536  
SOLVENT CDC13  
NS 200  
DS 4  
SWH 36057.691 Hz  
FIDRES 0.550197 Hz  
AQ 0.9088159 sec  
RG 190.02  
DW 13.867 usec  
DE 6.50 usec  
TE 296.7 K  
D1 2.00000000 sec  
D11 0.03000000 sec  
TD0 1

==== CHANNEL f1 =====  
SFO1 150.9279571 MHz  
NUC1 13C  
P1 14.00 usec  
SI 32768  
SF 150.9128665 MHz  
WDW EM  
SSB 0  
LB 1.00 Hz  
GB 0  
PC 1.40

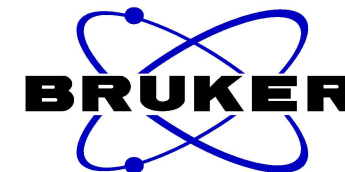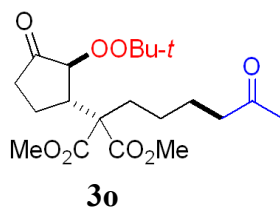

4.263  
4.250  
3.737  
3.723  
3.099  
3.086  
3.082  
3.073  
3.070  
3.057  
2.448  
2.436  
2.424  
2.296  
2.285  
2.280  
2.270  
2.260  
2.130  
2.068  
2.060  
2.045  
2.037  
2.025  
2.016  
2.007  
1.996  
1.992  
1.988  
1.973  
1.965  
1.660  
1.649  
1.637  
1.632  
1.621  
1.617  
1.615  
1.608  
1.603

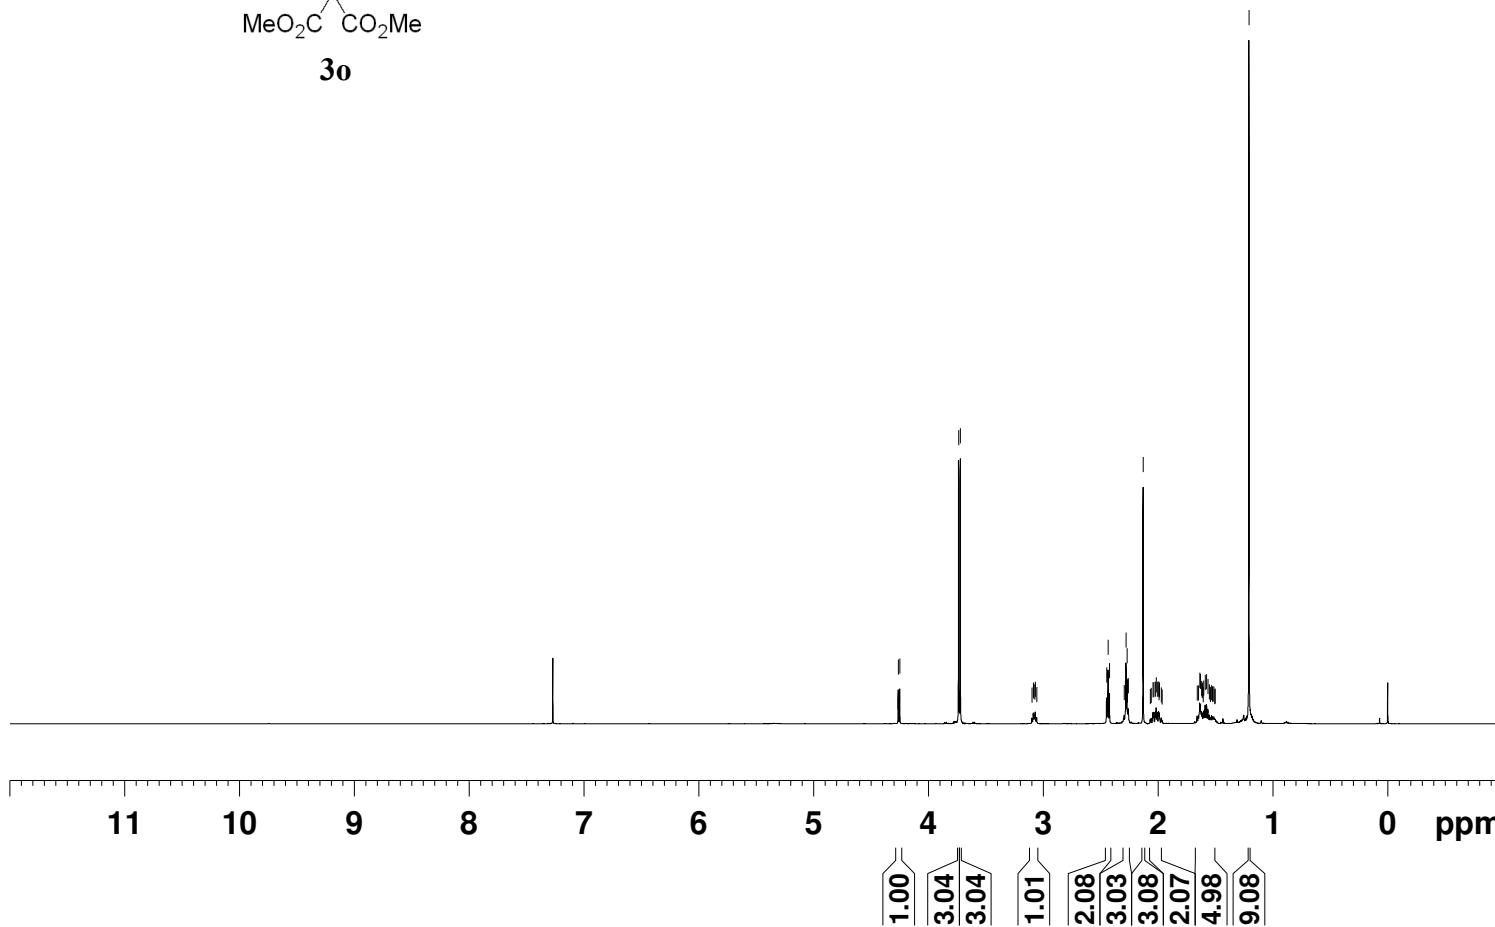

NAME w11-554p-20210610  
EXPNO 1  
PROCNO 1  
Date\_ 20210611  
Time 5.40  
INSTRUM spect  
PROBHD 5 mm PABBO BB/  
PULPROG zg30  
TD 65536  
SOLVENT CDCl3  
NS 8  
DS 0  
SWH 9615.385 Hz  
FIDRES 0.146719 Hz  
AQ 3.4079220 sec  
RG 76.92  
DW 52.000 usec  
DE 6.50 usec  
TE 295.6 K  
D1 1.00000000 sec  
TD0 1

==== CHANNEL f1 =====  
SFO1 600.1739011 MHz  
NUC1 1H  
P1 9.96 usec  
SI 65536  
SF 600.1700095 MHz  
WDW EM  
SSB 0  
LB 0.30 Hz  
GB 0  
PC 1.00

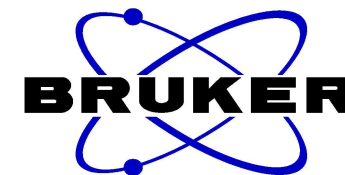

NAME w11-554p-20210610  
EXPNO 2  
PROCNO 1  
Date\_ 20210611  
Time 6.11  
INSTRUM spect  
PROBHD 5 mm PABBO BB/  
PULPROG zgpg30  
TD 65536  
SOLVENT CDCl3  
NS 600  
DS 4  
SWH 36057.691 Hz  
FIDRES 0.550197 Hz  
AQ 0.9088159 sec  
RG 190.02  
DW 13.867 usec  
DE 6.50 usec  
TE 296.7 K  
D1 2.0000000 sec  
D11 0.03000000 sec  
TD0 1

===== CHANNEL f1 =====  
SFO1 150.9279571 MHz  
NUC1 13C  
P1 14.00 usec  
SI 32768  
SF 150.9128665 MHz  
WDW EM  
SSB 0  
LB 1.00 Hz  
GB 0  
PC 1.40

212.486  
208.623

171.100  
171.011

84.926  
80.552

60.048  
52.342  
52.283  
43.269  
42.417  
36.480  
34.435  
29.919  
26.424  
24.275  
23.937  
20.979

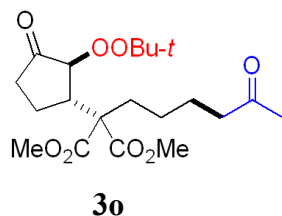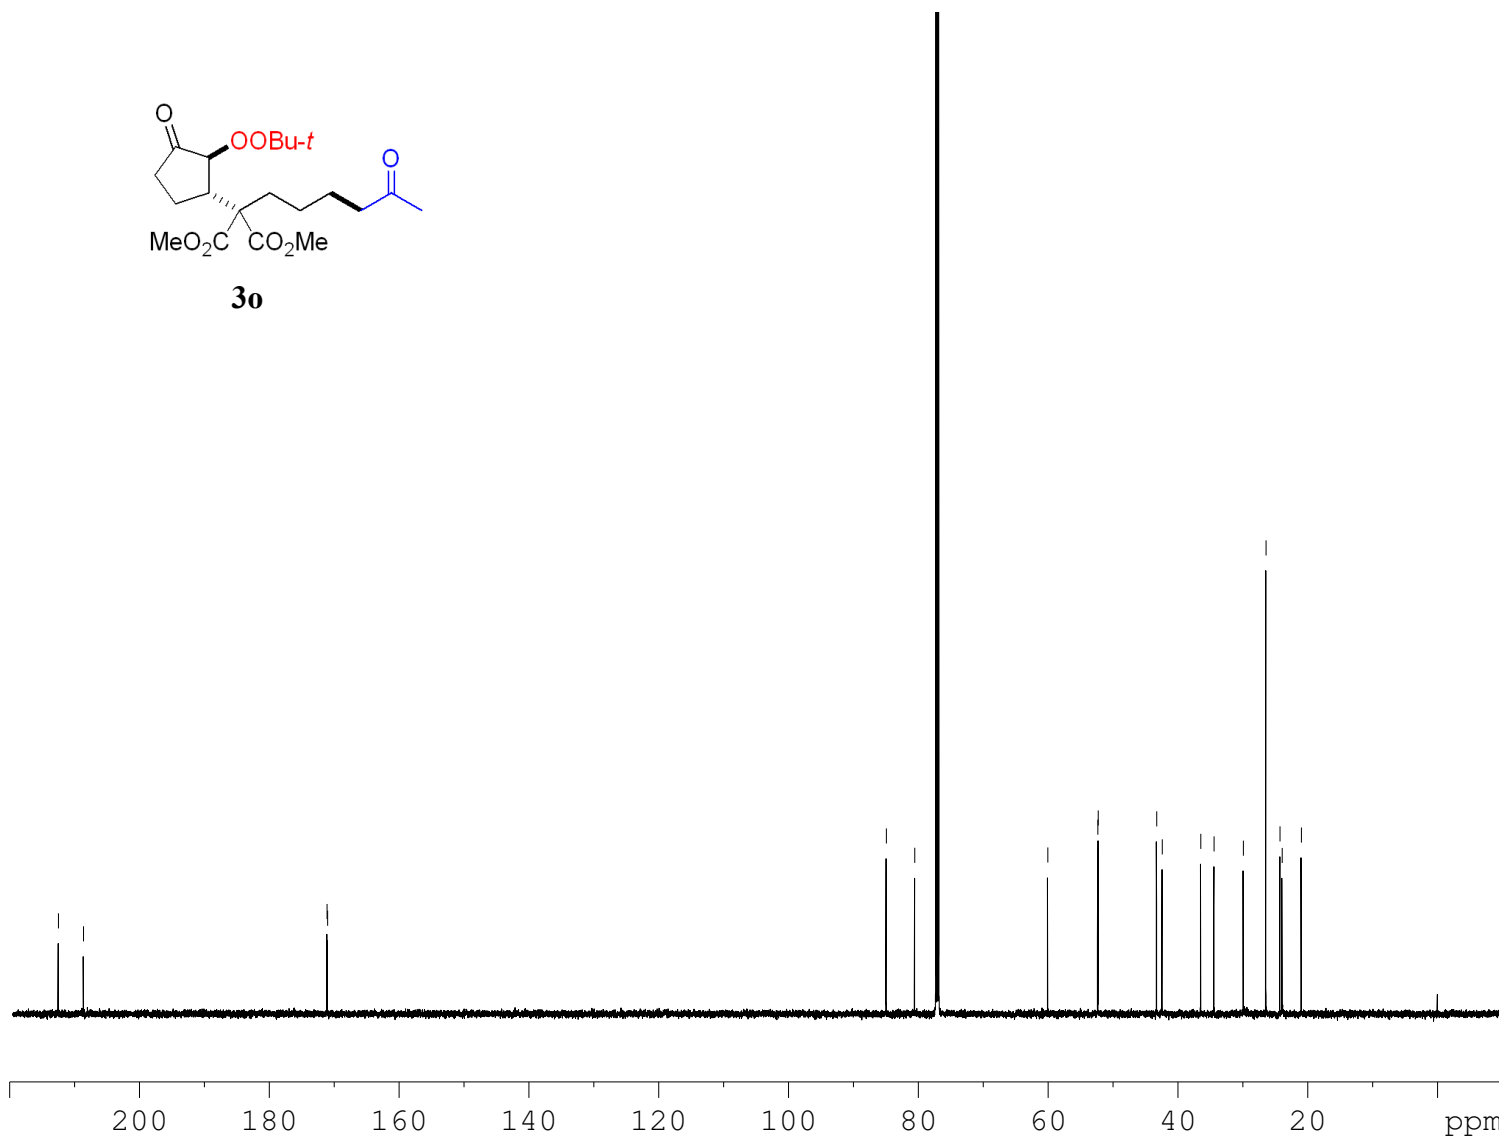



4.279  
4.271  
3.655  
3.626  
2.548  
2.546  
2.540  
2.522  
2.519  
2.513  
2.454  
2.445  
2.436  
2.427  
2.419  
2.379  
2.367  
2.354  
2.173  
2.162  
2.156  
2.144  
2.135  
2.129  
2.117  
2.058  
1.893  
1.877  
1.870  
1.857  
1.849  
1.840  
1.831  
1.822  
1.804  
1.797  
1.792  
1.784  
1.776  
1.523  
1.511  
1.498  
1.486

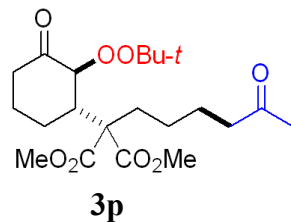

```

NAME      w11-592p-20210719
EXPNO     1
PROCNO    1
Date_     20210719
Time      21.53
INSTRUM   spect
PROBHD    5 mm PABBO BB/
PULPROG   zg30
TD        65536
SOLVENT   CDC13
NS        8
DS        0
SWH       9615.385 Hz
FIDRES    0.146719 Hz
AQ        3.4079220 sec
RG        62.22
DW        52.000 usec
DE        6.50 usec
TE        297.0 K
D1        1.00000000 sec
TD0       1
  
```

```

===== CHANNEL f1 =====
SFO1     600.1739011 MHz
NUC1     1H
P1       9.96 usec
SI       65536
SF       600.1700488 MHz
WDW      EM
SSB      0
LB       0.30 Hz
GB       0
PC       1.00
  
```

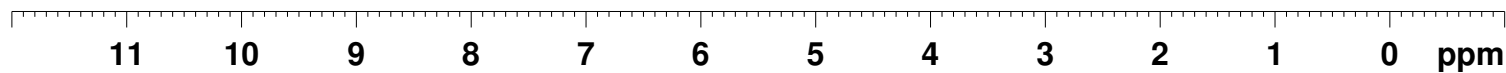

1.00  
3.05  
2.97  
1.01  
1.00  
2.11  
1.06  
3.14  
5.14  
2.07  
0.98  
1.92  
9.10

208.629  
207.471

170.631  
170.619

86.348  
80.866

60.166  
52.311  
52.048  
45.924  
43.209  
37.961  
34.331  
29.912  
29.694  
26.395  
24.386  
24.086  
23.919  
21.623

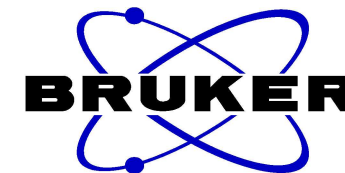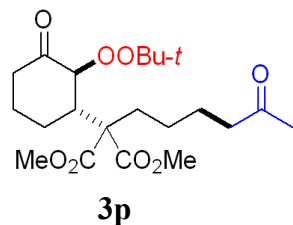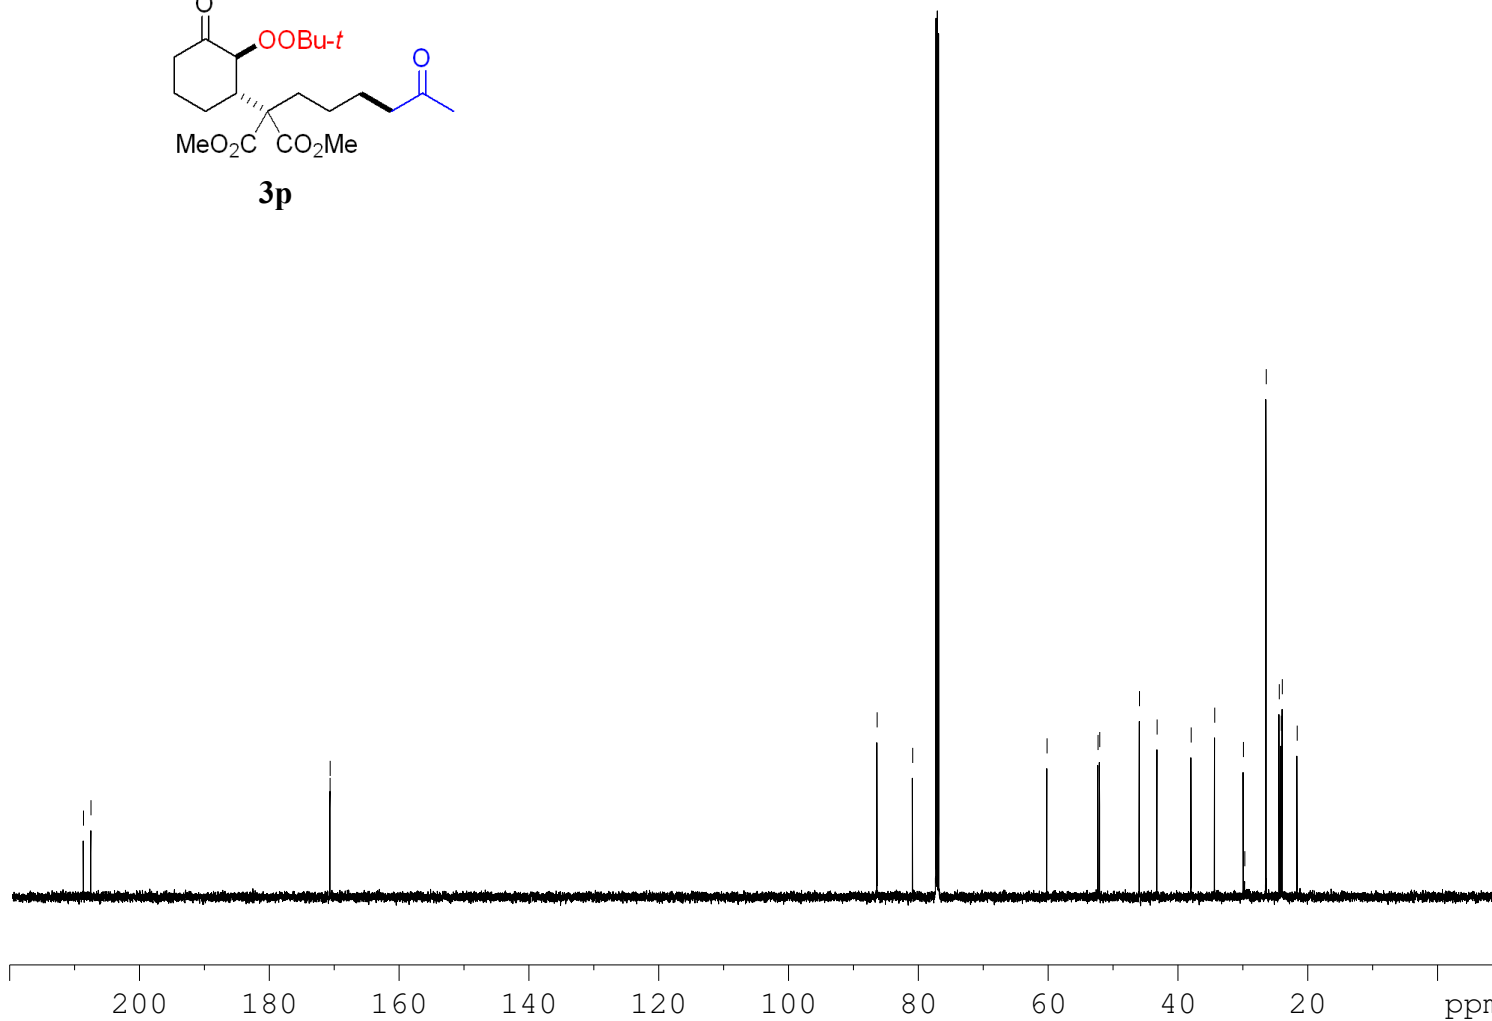

NAME w11-592p-20210719  
EXPNO 2  
PROCNO 1  
Date\_ 20210719  
Time 22.56  
INSTRUM spect  
PROBHD 5 mm PABBO BB/  
PULPROG zgpg30  
TD 65536  
SOLVENT CDCl3  
NS 200  
DS 4  
SWH 36057.691 Hz  
FIDRES 0.550197 Hz  
AQ 0.9088159 sec  
RG 190.02  
DW 13.867 usec  
DE 6.50 usec  
TE 298.4 K  
D1 2.00000000 sec  
D11 0.03000000 sec  
TD0 1

===== CHANNEL f1 =====  
SF01 150.9279571 MHz  
NUC1 13C  
P1 14.00 usec  
SI 32768  
SF 150.9128665 MHz  
WDW EM  
SSB 0  
LB 1.00 Hz  
GB 0  
PC 1.40

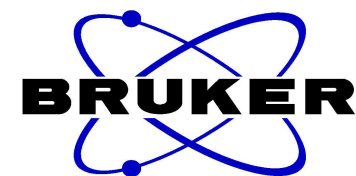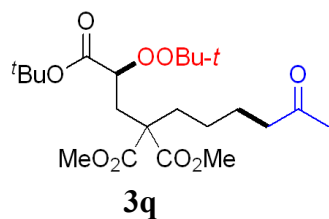

4.240  
4.230  
4.219  
3.725  
2.448  
2.436  
2.424  
2.299  
2.288  
2.128  
2.066  
2.058  
2.042  
2.035  
2.022  
2.014  
1.981  
1.973  
1.961  
1.953  
1.938  
1.929  
1.623  
1.610  
1.598  
1.585  
1.572  
1.483  
1.440  
1.432  
1.205

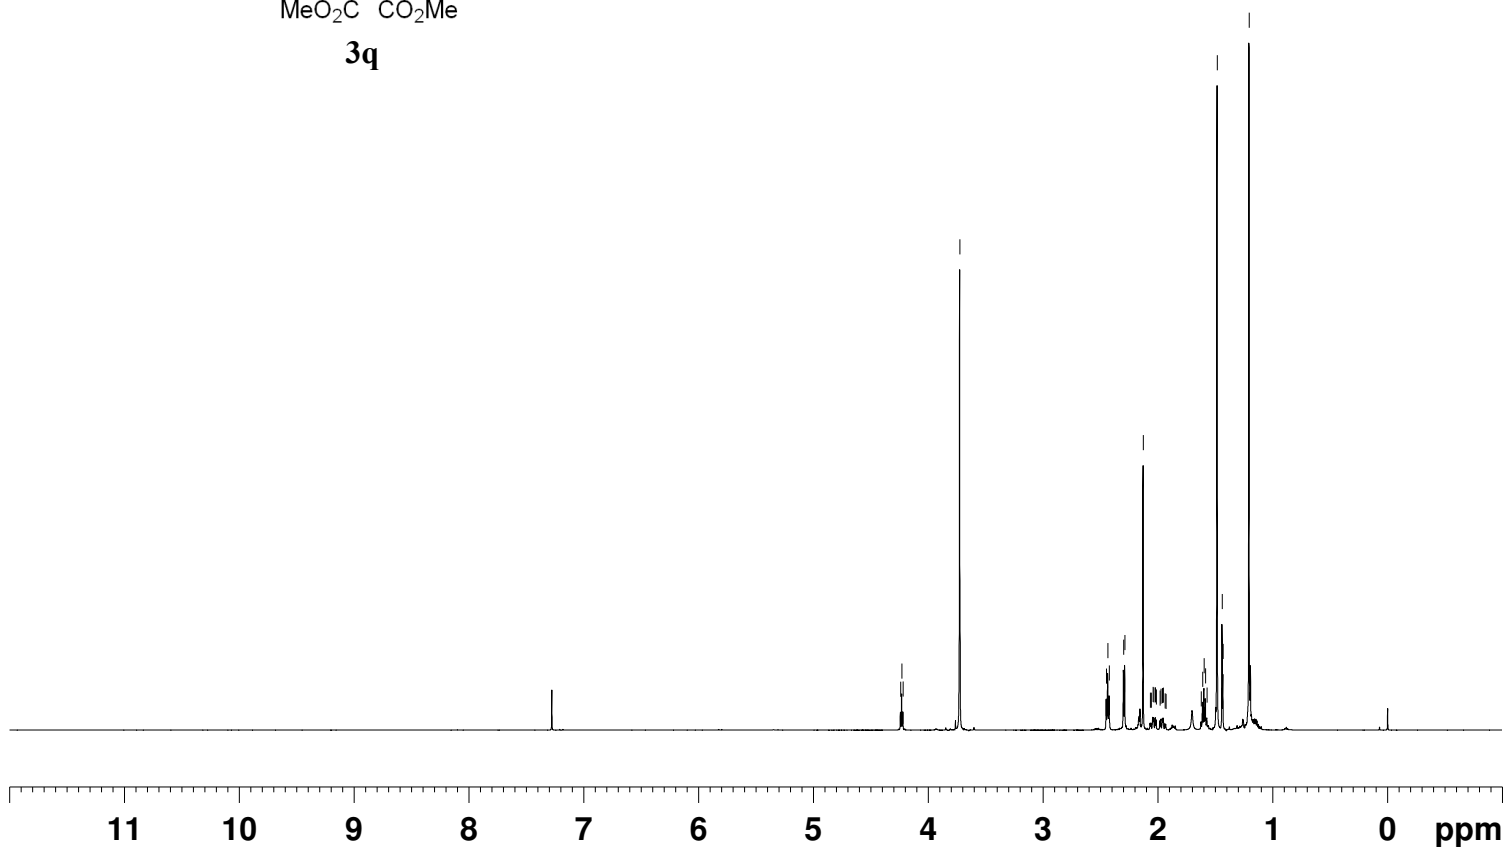

1.00  
5.97  
2.09  
2.07  
3.01  
1.12  
0.98  
2.10  
9.00  
2.13  
9.00

NAME wll-564p-20210625  
EXPNO 1  
PROCNO 1  
Date\_ 20210625  
Time 16.06  
INSTRUM spect  
PROBHD 5 mm PABBO BB/  
PULPROG zg30  
TD 65536  
SOLVENT CDCl3  
NS 8  
DS 0  
SWH 9615.385 Hz  
FIDRES 0.146719 Hz  
AQ 3.4079220 sec  
RG 56.75  
DW 52.000 usec  
DE 6.50 usec  
TE 296.5 K  
D1 1.00000000 sec  
TD0 1

===== CHANNEL f1 =====  
SFO1 600.1739011 MHz  
NUC1 1H  
P1 9.96 usec  
SI 65536  
SF 600.1700060 MHz  
WDW EM  
SSB 0  
LB 0.30 Hz  
GB 0  
PC 1.00

— 208.531

171.306  
171.157  
170.370

81.501  
80.611  
79.172

55.666  
52.677  
52.543  
43.264  
33.024  
32.074  
29.898  
27.980  
26.434  
23.789  
23.634

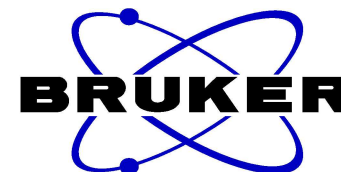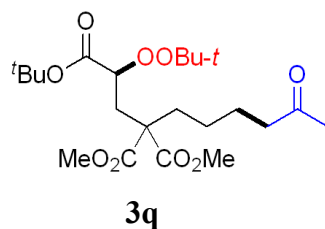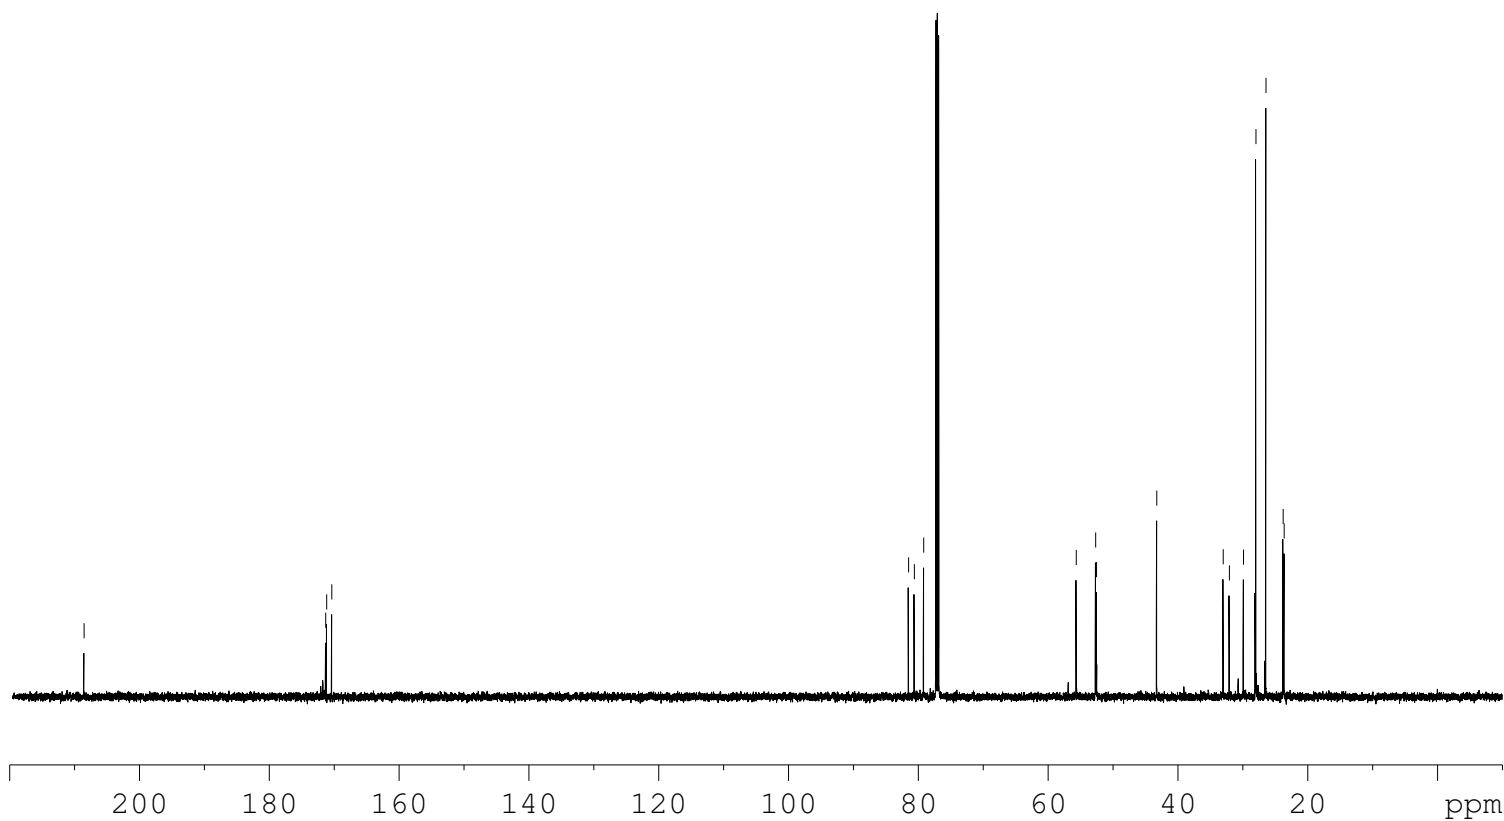

```
NAME      w11-564p-20210625
EXPNO     2
PROCNO    1
Date_     20210625
Time      23.04
INSTRUM   spect
PROBHD    5 mm PABBO BB/
PULPROG   zgpg30
TD         65536
SOLVENT   CDCl3
NS         200
DS         4
SWH       36057.691 Hz
FIDRES    0.550197 Hz
AQ         0.9088159 sec
RG         190.02
DW         13.867 usec
DE         6.50 usec
TE         297.7 K
D1         2.0000000 sec
D11        0.03000000 sec
TD0        1
```

```
===== CHANNEL f1 =====
SFO1      150.9279571 MHz
NUC1       13C
P1         14.00 usec
SI         32768
SF         150.9128665 MHz
WDW        EM
SSB        0
LB         1.00 Hz
GB         0
PC         1.40
```



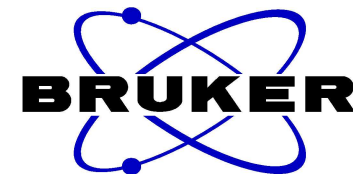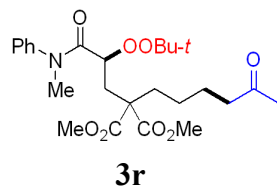

7.440  
7.428  
7.415  
7.365  
7.353  
7.340  
7.275  
7.268  
7.256  
4.479  
4.474  
4.462  
4.457  
3.663  
3.544  
3.299  
2.471  
2.454  
2.446  
2.428  
2.315  
2.303  
2.290  
2.181  
2.176  
2.155  
2.150  
2.110  
1.888  
1.881  
1.866  
1.859  
1.843  
1.836  
1.618  
1.611  
1.596  
1.589  
1.574  
1.567  
1.390  
1.378  
1.365  
1.353  
1.340  
1.166  
1.042

NAME w11-563p-20210625  
EXPNO 1  
PROCNO 1  
Date\_ 20210625  
Time 16.02  
INSTRUM spect  
PROBHD 5 mm PABBO BB/  
PULPROG zg30  
TD 65536  
SOLVENT CDCl3  
NS 8  
DS 0  
SWH 9615.385 Hz  
FIDRES 0.146719 Hz  
AQ 3.4079220 sec  
RG 62.22  
DW 52.000 usec  
DE 6.50 usec  
TE 296.5 K  
D1 1.00000000 sec  
TD0 1

==== CHANNEL f1 =====  
SFO1 600.1739011 MHz  
NUC1 1H  
P1 9.96 usec  
SI 65536  
SF 600.1700068 MHz  
WDW EM  
SSB 0  
LB 0.30 Hz  
GB 0  
PC 1.00

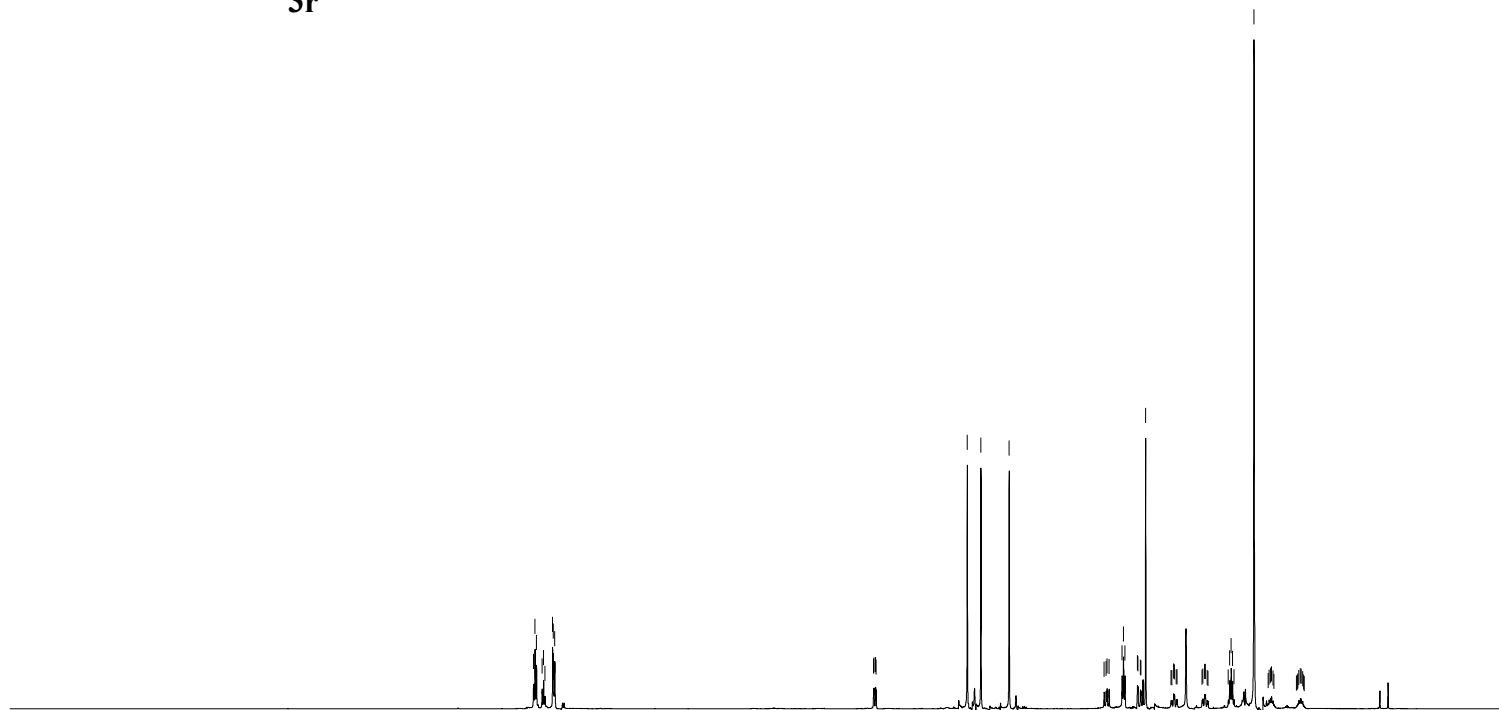

2.07  
1.00  
2.05

1.01

3.05

2.98

2.99

1.05

2.04

1.13

3.03

1.14

1.09

1.99

9.11

0.94

1.05

— 208.530

171.178  
170.180

— 143.134

129.633  
127.978  
127.893

— 80.857  
— 75.599

55.420  
52.508  
52.488  
43.195  
37.958  
33.360  
32.108  
29.894  
26.350  
23.642  
23.501

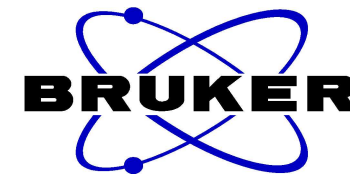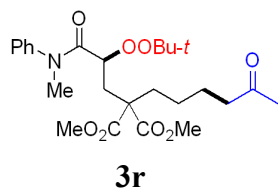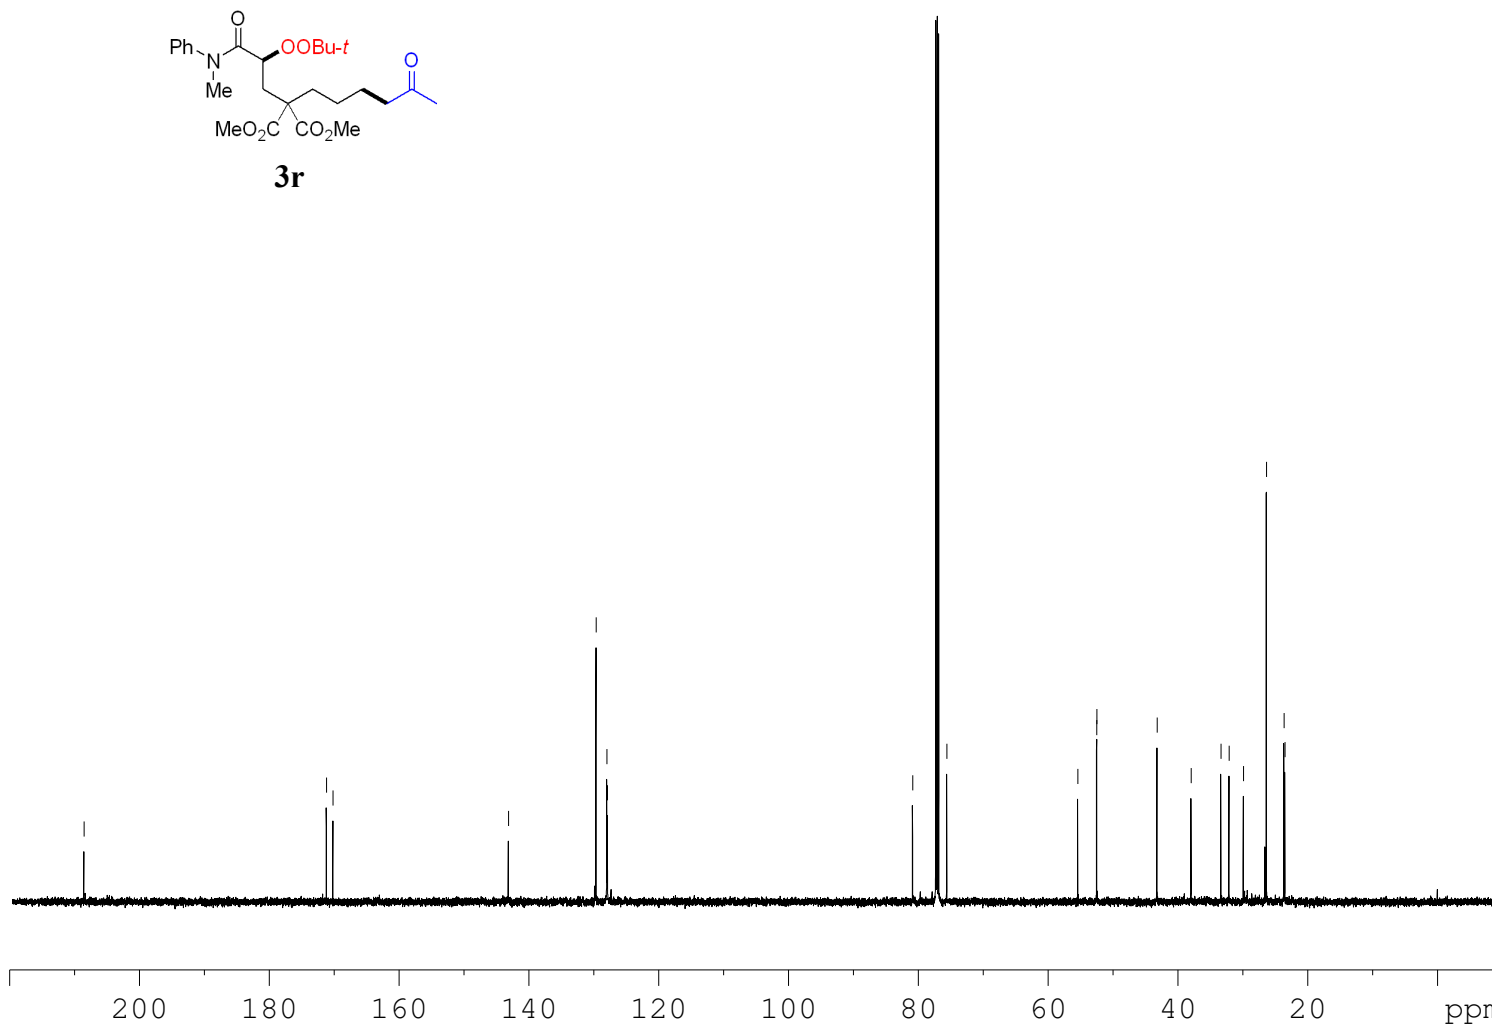

NAME w11-563p-20210625  
EXPNO 2  
PROCNO 1  
Date\_ 20210625  
Time 23.28  
INSTRUM spect  
PROBHD 5 mm PABBO BB/  
PULPROG zgpg30  
TD 65536  
SOLVENT CDCl3  
NS 400  
DS 4  
SWH 36057.691 Hz  
FIDRES 0.550197 Hz  
AQ 0.9088159 sec  
RG 190.02  
DW 13.867 usec  
DE 6.50 usec  
TE 297.7 K  
D1 2.00000000 sec  
D11 0.03000000 sec  
TD0 1

==== CHANNEL f1 =====  
SFO1 150.9279571 MHz  
NUC1 13C  
P1 14.00 usec  
SI 32768  
SF 150.9128665 MHz  
WDW EM  
SSB 0  
LB 1.00 Hz  
GB 0  
PC 1.40

8.081  
8.069  
7.588  
7.576  
7.564  
7.482  
7.470  
7.457  
5.205  
5.199  
5.190  
5.184  
5.134  
5.128  
5.119  
5.113  
3.713  
3.702  
2.529  
2.522  
2.516  
2.504  
2.497  
2.490  
2.484  
2.470  
2.470  
2.463  
2.456  
2.443  
2.437  
2.428  
2.418  
2.409  
2.402  
2.381  
2.143  
2.132  
1.991  
1.978  
1.967  
1.953  
1.919  
1.907  
1.894  
1.882  
1.597  
1.595  
1.588  
1.581  
1.579  
1.572  
1.564  
1.556  
1.547  
1.439  
1.435  
1.429  
1.423  
1.419  
1.413  
1.403  
1.121  
1.117  
0.836  
0.826  
0.825

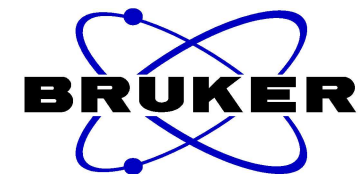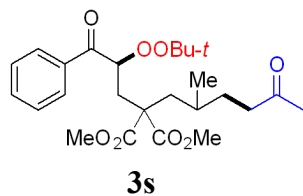

NAME wll-560p-20210623  
EXPNO 1  
PROCNO 1  
Date\_ 20210623  
Time 19.38  
INSTRUM spect  
PROBHD 5 mm PABBO BB/  
PULPROG zg30  
TD 65536  
SOLVENT CDCl3  
NS 8  
DS 0  
SWH 9615.385 Hz  
FIDRES 0.146719 Hz  
AQ 3.4079220 sec  
RG 50.85  
DW 52.000 usec  
DE 6.50 usec  
TE 297.4 K  
D1 1.00000000 sec  
TD0 1

===== CHANNEL f1 =====  
SFO1 600.1739011 MHz  
NUC1 1H  
P1 9.96 usec  
SI 65536  
SF 600.1700078 MHz  
WDW EM  
SSB 0  
LB 0.30 Hz  
GB 0  
PC 1.00

11 10 9 8 7 6 5 4 3 2 1 0 ppm

1.97  
1.00  
2.04  
0.50  
0.51  
2.97  
2.99  
4.07  
3.98  
1.00  
2.06  
1.10  
8.93  
3.01

208.695  
208.652  
198.028  
197.905

171.762  
171.729  
171.542  
171.469

135.333  
135.252  
133.262  
129.090  
129.063  
128.472

81.858  
81.581  
80.851  
80.809

55.150  
55.050  
52.640  
52.562  
52.437  
41.027  
40.092  
39.719  
33.841  
33.630  
31.646  
31.443  
29.922  
29.906  
28.344  
28.330  
26.389

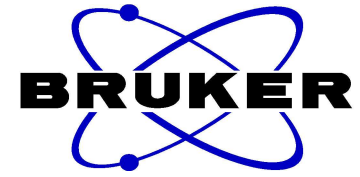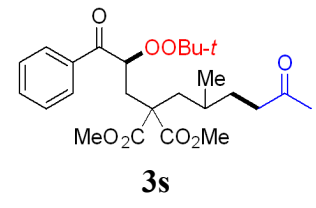

NAME w11-560p-20210623  
EXPNO 2  
PROCNO 1  
Date\_ 20210623  
Time 20.24  
INSTRUM spect  
PROBHD 5 mm PABBO BB/  
PULPROG zgpg30  
TD 65536  
SOLVENT CDCl3  
NS 240  
DS 4  
SWH 36057.691 Hz  
FIDRES 0.550197 Hz  
AQ 0.9088159 sec  
RG 190.02  
DW 13.867 usec  
DE 6.50 usec  
TE 298.5 K  
D1 2.0000000 sec  
D11 0.0300000 sec  
TD0 1

===== CHANNEL f1 =====  
SFO1 150.9279571 MHz  
NUC1 13C  
P1 14.00 usec  
SI 32768  
SF 150.9128665 MHz  
WDW EM  
SSB 0  
LB 1.00 Hz  
GB 0  
PC 1.40

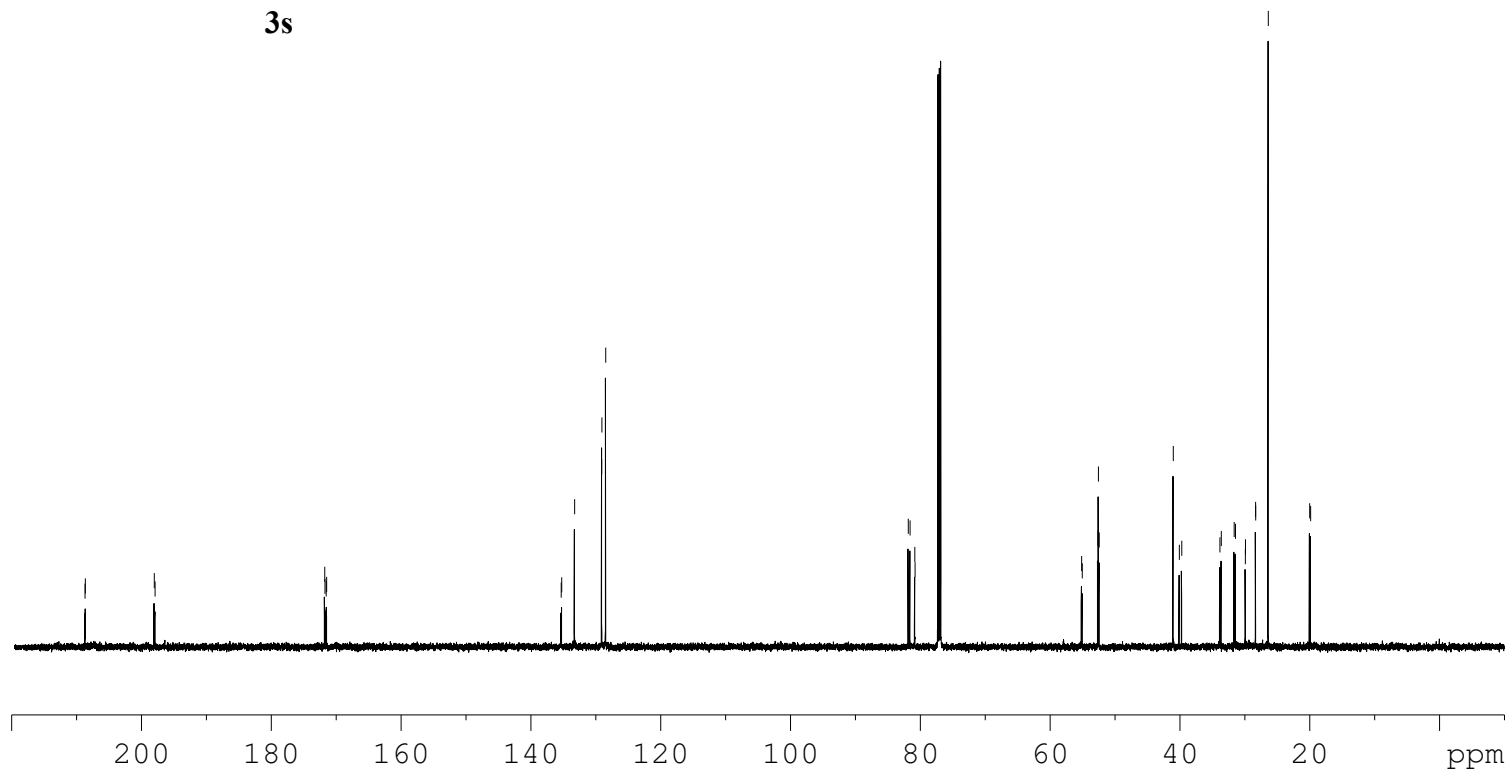

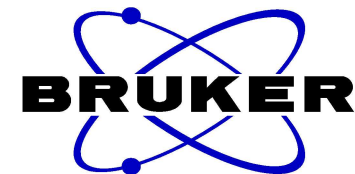

8.079  
8.066  
7.585  
7.573  
7.561  
7.478  
7.465  
7.452  
5.146  
5.136  
5.125  
4.223  
4.217  
4.211  
4.205  
4.199  
4.193  
4.187  
4.181  
4.175  
4.168  
4.163  
4.157  
4.151  
4.145  
4.138  
2.453  
2.441  
2.435  
2.428  
2.424  
2.132  
2.117  
2.109  
2.094  
2.086  
2.072  
2.065  
2.037  
2.029  
2.016  
2.008  
1.993  
1.985  
1.634  
1.622  
1.609  
1.597  
1.584

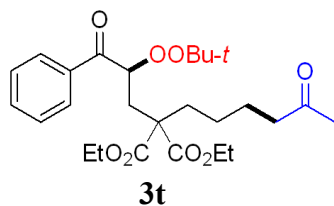

NAME w11-550p-20210610  
EXPNO 1  
PROCNO 1  
Date\_ 20210610  
Time 17.37  
INSTRUM spect  
PROBHD 5 mm PABBO BB/  
PULPROG zg30  
TD 65536  
SOLVENT CDCl3  
NS 8  
DS 0  
SWH 9615.385 Hz  
FIDRES 0.146719 Hz  
AQ 3.4079220 sec  
RG 56.75  
DW 52.000 usec  
DE 6.50 usec  
TE 295.6 K  
D1 1.00000000 sec  
TD0 1

===== CHANNEL f1 =====  
SFO1 600.1739011 MHz  
NUC1 1H  
P1 9.96 usec  
SI 65536  
SF 600.1700098 MHz  
WDW EM  
SSB 0  
LB 0.30 Hz  
GB 0  
PC 1.00

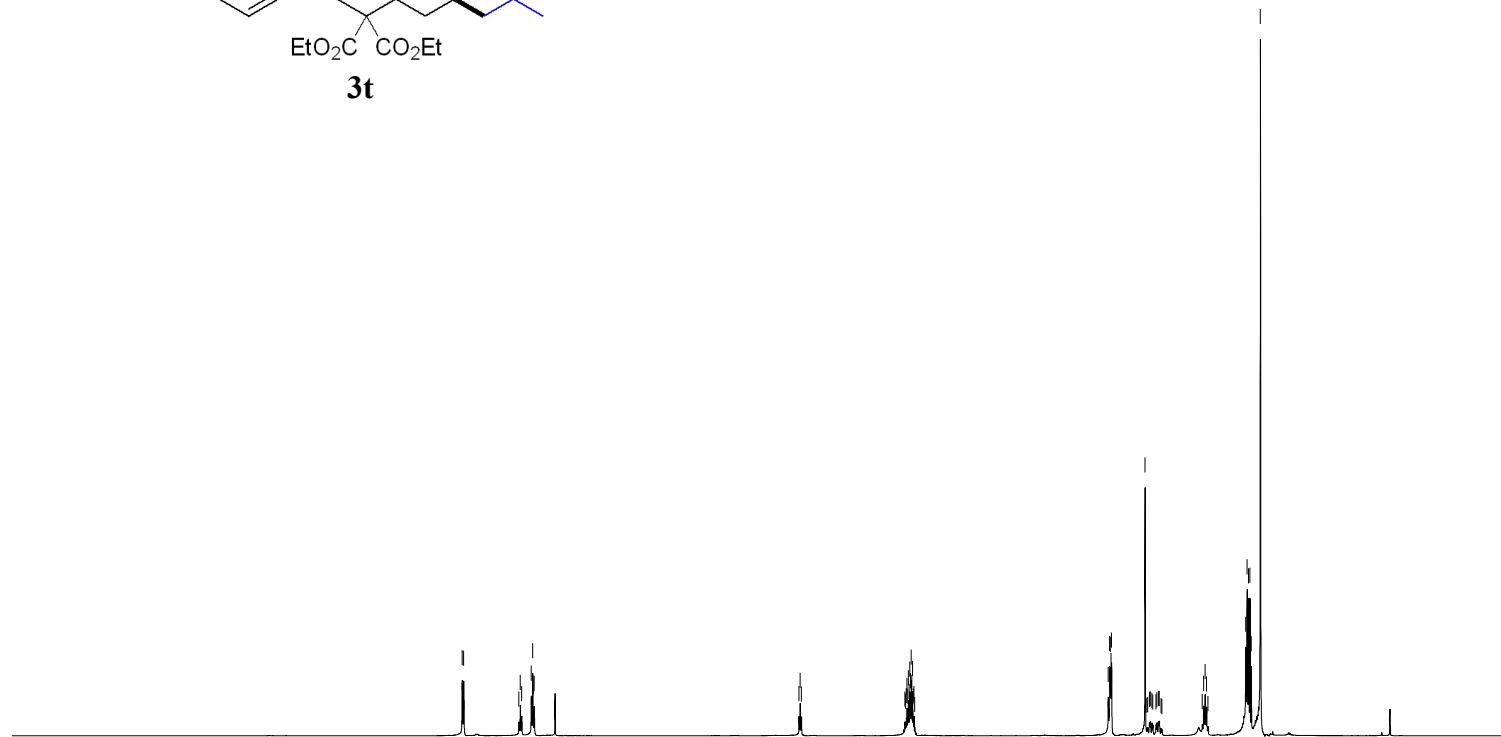

11 10 9 8 7 6 5 4 3 2 1 0 ppm

1.97  
1.05  
2.06  
1.00  
4.08  
4.07  
2.96  
1.03  
1.07  
2.15  
8.01  
8.94

— 208.557

— 198.050

< 170.875  
< 170.822

< 135.221  
< 133.249  
< 129.054  
< 128.466

< 81.906  
< 80.785

< 61.557  
< 61.391  
< 55.929

< 43.279  
< 32.972  
< 32.498  
< 29.934  
< 26.383  
< 23.855  
< 23.707  
< 14.004

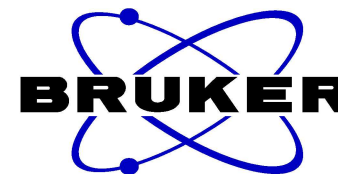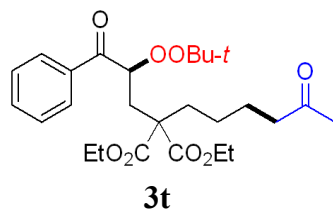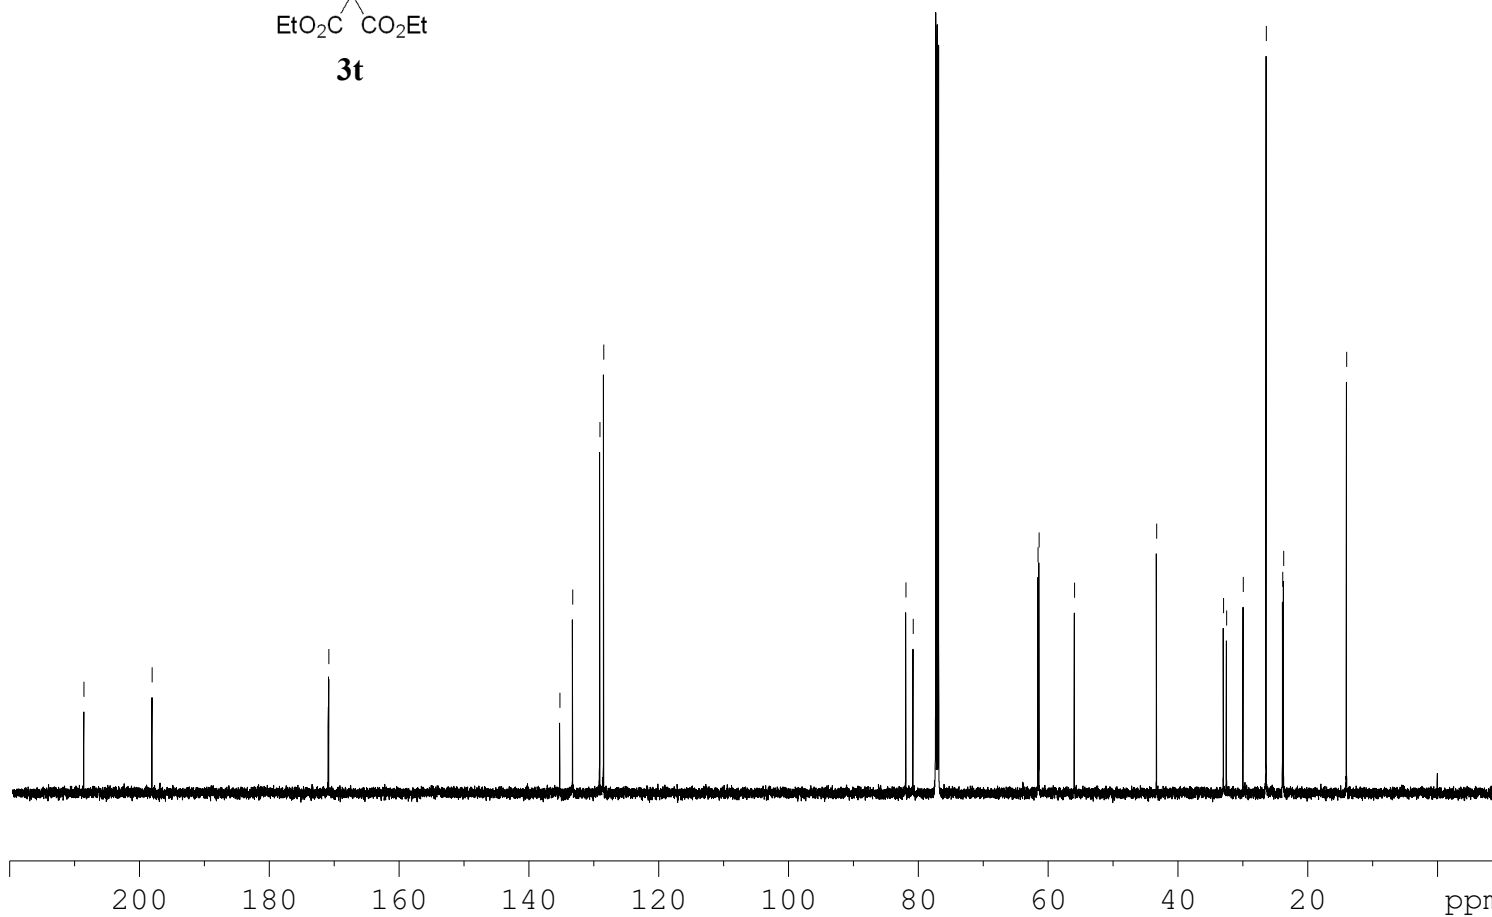

NAME w11-550p-20210610  
EXPNO 2  
PROCNO 1  
Date\_ 20210611  
Time 0.51  
INSTRUM spect  
PROBHD 5 mm PABBO BB/  
PULPROG zgpg30  
TD 65536  
SOLVENT CDC13  
NS 300  
DS 4  
SWH 36057.691 Hz  
FIDRES 0.550197 Hz  
AQ 0.9088159 sec  
RG 190.02  
DW 13.867 usec  
DE 6.50 usec  
TE 296.9 K  
D1 2.0000000 sec  
D11 0.03000000 sec  
TD0 1

===== CHANNEL f1 =====  
SFO1 150.9279571 MHz  
NUC1 13C  
P1 14.00 usec  
SI 32768  
SF 150.9128665 MHz  
WDW EM  
SSB 0  
LB 1.00 Hz  
GB 0  
PC 1.40

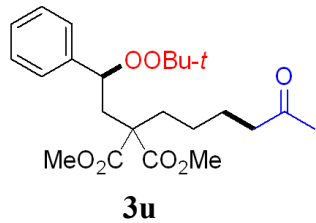

7.341  
7.329  
7.317  
7.314  
7.303  
7.290  
7.288  
7.280

4.817  
4.808  
4.803  
4.795  
3.707  
3.553  
2.576  
2.562  
2.551  
2.537  
2.424  
2.412  
2.400  
2.339  
2.331  
2.314  
2.306  
2.125  
2.075  
2.068  
2.054  
2.046  
2.015  
2.008  
1.994  
1.987  
1.603  
1.591  
1.578  
1.566  
1.553  
1.238  
1.228  
1.218  
1.207

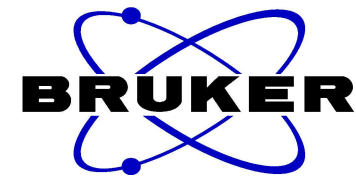

NAME w11-540-7p-20210608  
 EXPNO 1  
 PROCNO 1  
 Date\_ 20210608  
 Time\_ 15.05  
 INSTRUM spect  
 PROBHD 5 mm PABBO BB/  
 PULPROG zg30  
 TD 65536  
 SOLVENT CDC13  
 NS 8  
 DS 0  
 SWH 9615.385 Hz  
 FIDRES 0.146719 Hz  
 AQ 3.4079220 sec  
 RG 36.09  
 DW 52.000 usec  
 DE 6.50 usec  
 TE 295.6 K  
 D1 1.00000000 sec  
 TD0 1

==== CHANNEL f1 =====  
 SFO1 600.1739011 MHz  
 NUC1 1H  
 P1 9.96 usec  
 SI 65536  
 SF 600.1700095 MHz  
 WDW EM  
 SSB 0  
 LB 0.30 Hz  
 GB 0  
 PC 1.00

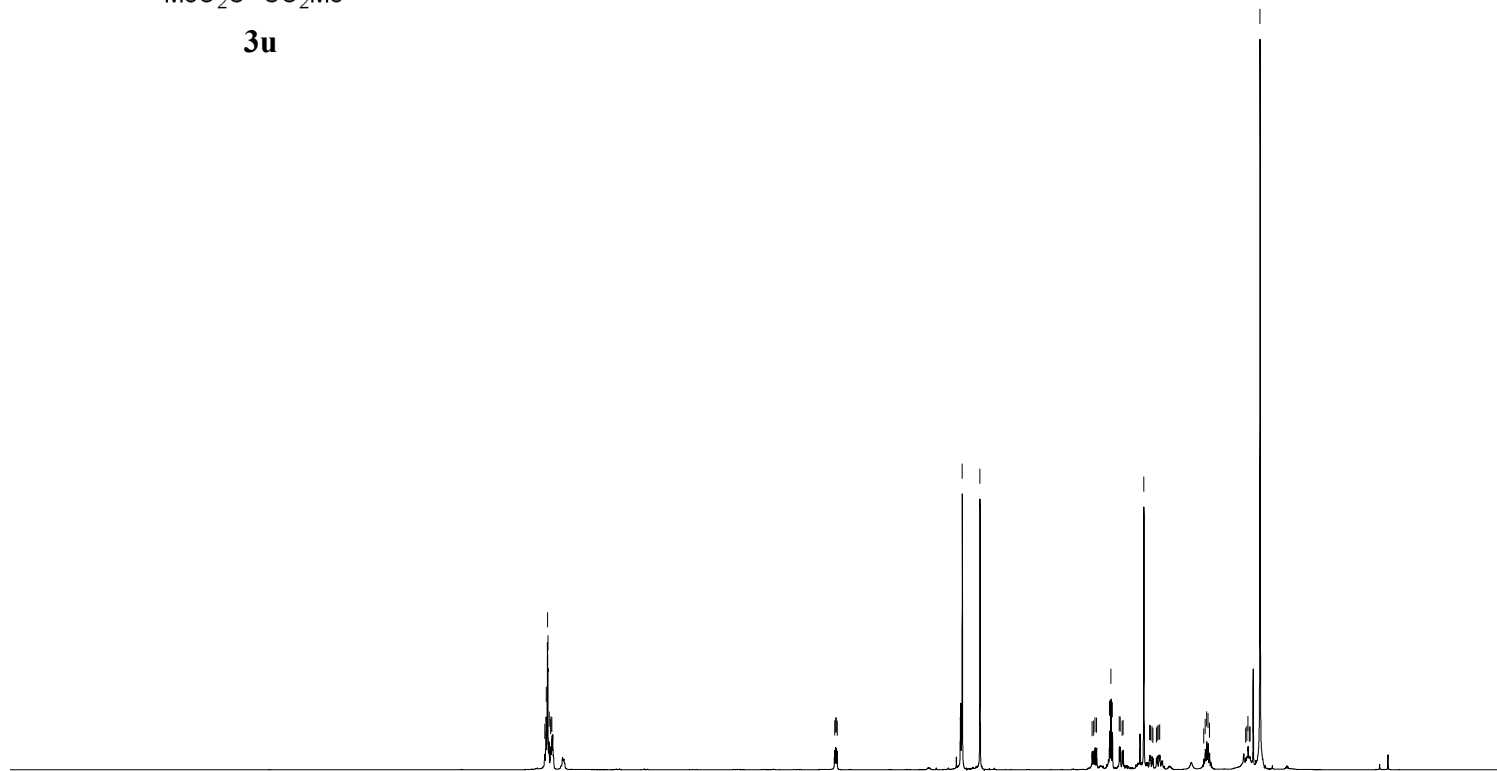

5.19  
1.00  
2.97  
3.00  
1.07  
2.07  
1.09  
3.08  
0.93  
0.94  
2.00  
2.06  
8.98

— 208.586

< 171.599  
< 171.493

— 141.067  
< 128.124  
< 127.911  
< 127.319

< 81.896  
< 79.987

< 55.923  
< 52.461  
< 52.378  
< 43.256  
< 37.284  
< 32.142  
< 29.920  
< 26.520  
< 23.802  
< 23.722

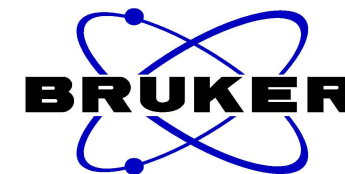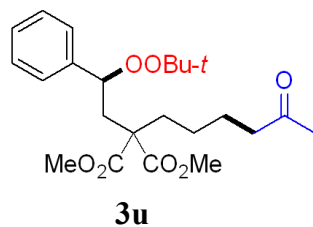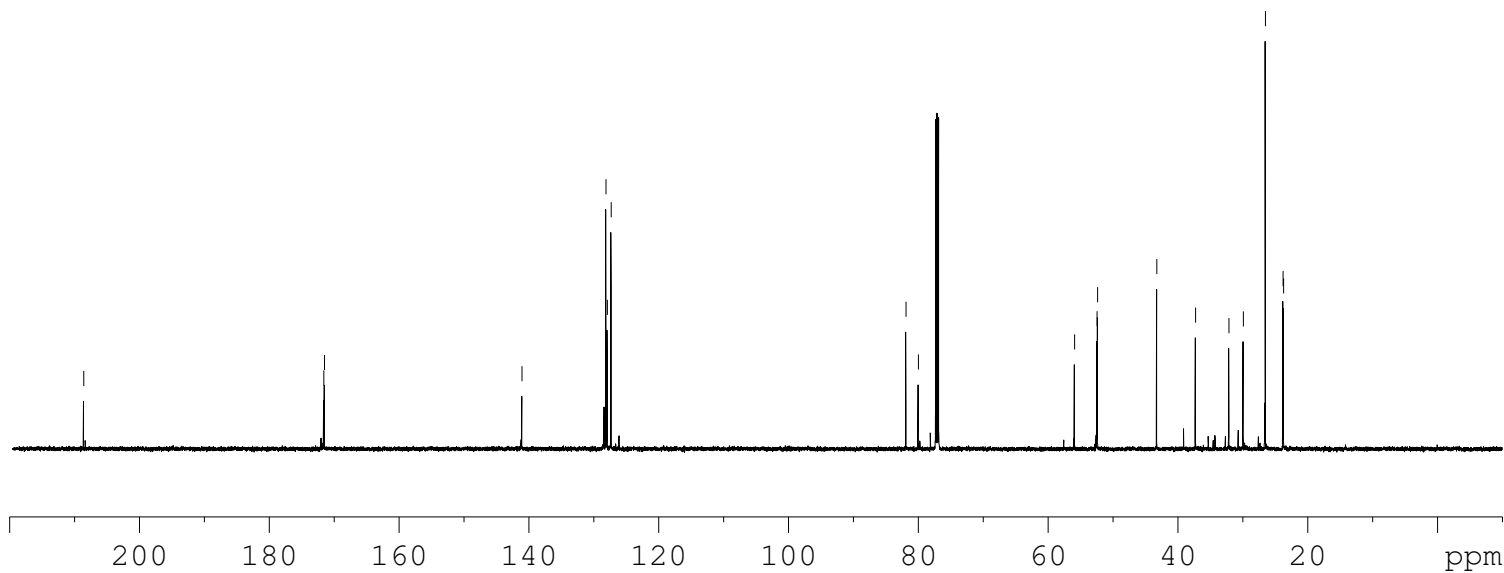

NAME w11-540-7p-20210608  
EXPNO 2  
PROCNO 1  
Date\_ 20210608  
Time 15.21  
INSTRUM spect  
PROBHD 5 mm PABBO BB/  
PULPROG zgpg30  
TD 65536  
SOLVENT CDC13  
NS 300  
DS 4  
SWH 36057.691 Hz  
FIDRES 0.550197 Hz  
AQ 0.9088159 sec  
RG 190.02  
DW 13.867 usec  
DE 6.50 usec  
TE 296.9 K  
D1 2.00000000 sec  
D11 0.03000000 sec  
TD0 1

===== CHANNEL f1 =====  
SFO1 150.9279571 MHz  
NUC1 13C  
P1 14.00 usec  
SI 32768  
SF 150.9128665 MHz  
WDW EM  
SSB 0  
LB 1.00 Hz  
GB 0  
PC 1.40



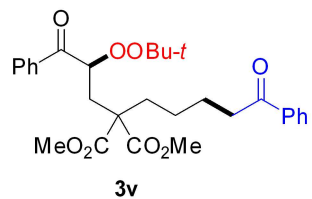

8.076  
8.064  
7.954  
7.942  
7.581  
7.568  
7.558  
7.546  
7.479  
7.474  
7.466  
7.453  
7.449  
7.269  
5.202  
5.193  
5.189  
5.181  
3.716  
3.708  
2.998  
2.986  
2.973  
2.478  
2.460  
2.452  
2.446  
2.421  
2.180  
2.172  
2.157  
2.149  
2.136  
2.128  
2.106  
2.099  
2.086  
2.063  
2.055  
1.812  
1.799  
1.787  
1.774  
1.762  
1.389  
1.380  
1.371  
1.363  
1.351  
1.342  
1.337

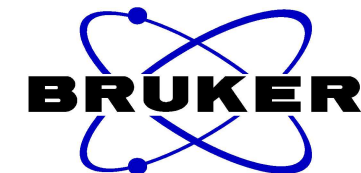

NAME w11-695p-20211118  
EXPNO 1  
PROCNO 1  
Date\_ 20211118  
Time 21.33  
INSTRUM spect  
PROBHD 5 mm PABBO BB/  
PULPROG zg30  
TD 65536  
SOLVENT CDCl3  
NS 8  
DS 0  
SWH 9615.385 Hz  
FIDRES 0.146719 Hz  
AQ 3.4079220 sec  
RG 44.5  
DW 52.000 usec  
DE 6.50 usec  
TE 297.6 K  
D1 1.00000000 sec  
TD0 1

==== CHANNEL f1 =====  
SFO1 600.1739011 MHz  
NUC1 1H  
P1 9.96 usec  
SI 65536  
SF 600.1700093 MHz  
WDW EM  
SSB 0  
LB 0.30 Hz  
GB 0  
PC 1.00

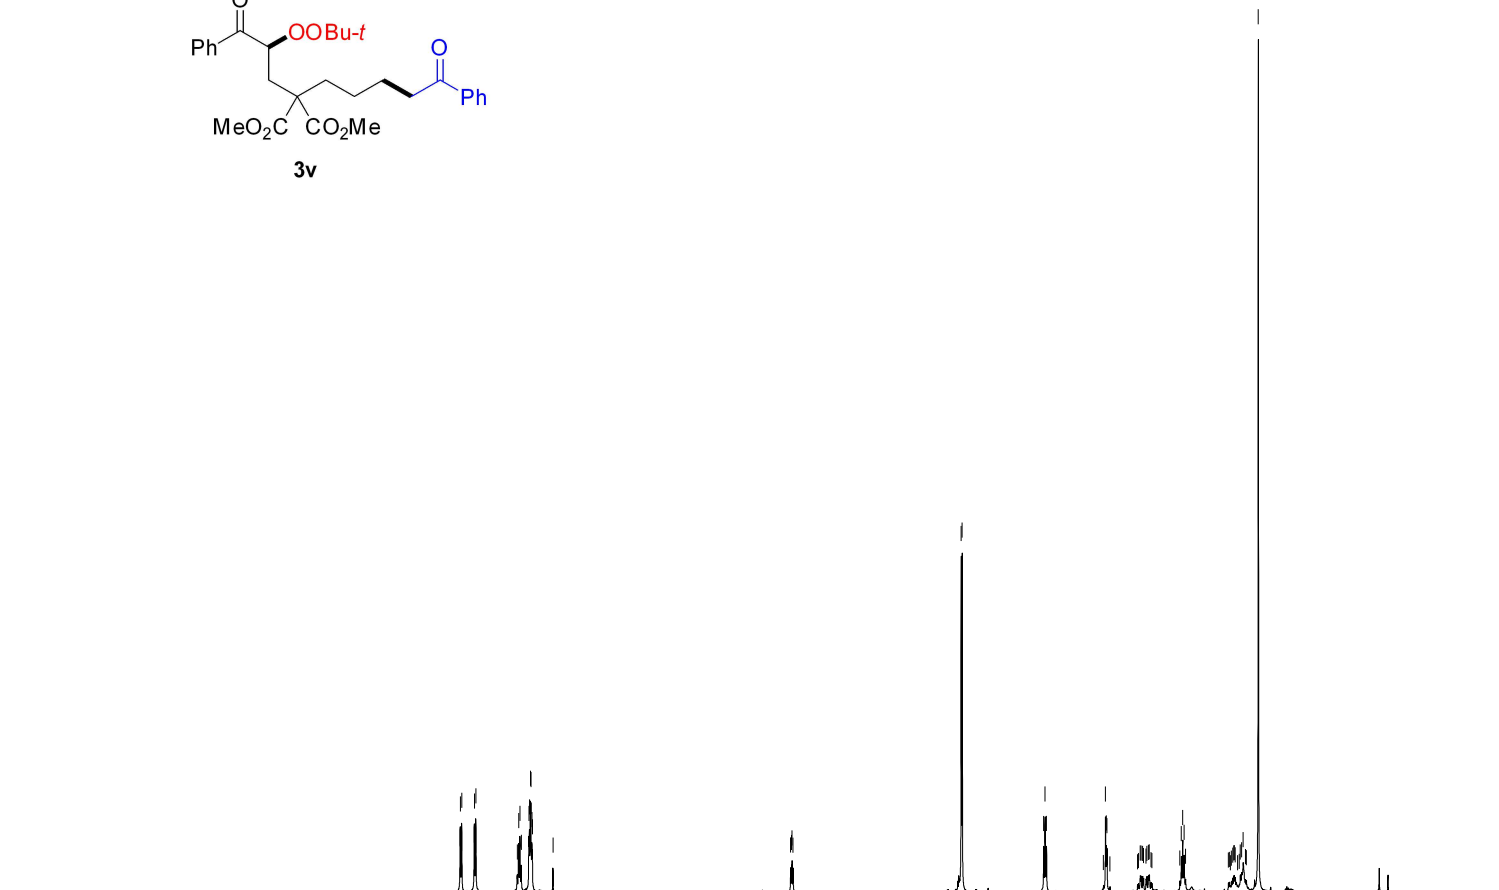

11 10 9 8 7 6 5 4 3 2 1 0 ppm

2.01  
2.07  
2.06  
4.08  
1.00  
3.06  
2.99  
2.09  
2.03  
1.01  
1.09  
2.02  
1.06  
1.09  
9.03

199.850  
197.921

171.380  
171.345

137.013  
135.299  
133.323  
133.029  
129.074  
128.643  
128.553  
128.053

81.598  
80.865

56.026  
52.695  
52.601  
38.177  
33.240  
32.920  
26.438  
24.302  
24.030

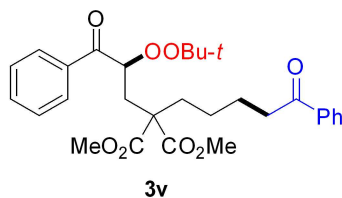

NAME w11-695p-20211118  
EXPNO 2  
PROCNO 1  
Date\_ 20211119  
Time 0.17  
INSTRUM spect  
PROBHD 5 mm PABBO BB/  
PULPROG zgpg30  
TD 65536  
SOLVENT CDCl3  
NS 200  
DS 4  
SWH 36057.691 Hz  
FIDRES 0.550197 Hz  
AQ 0.9088159 sec  
RG 190.02  
DW 13.867 usec  
DE 6.50 usec  
TE 298.7 K  
D1 2.0000000 sec  
D11 0.0300000 sec  
TD0 1

==== CHANNEL f1 =====  
SFO1 150.9279571 MHz  
NUC1 13C  
P1 11.90 usec  
SI 32768  
SF 150.9128594 MHz  
WDW EM  
SSB 0  
LB 1.00 Hz  
GB 0  
PC 1.40

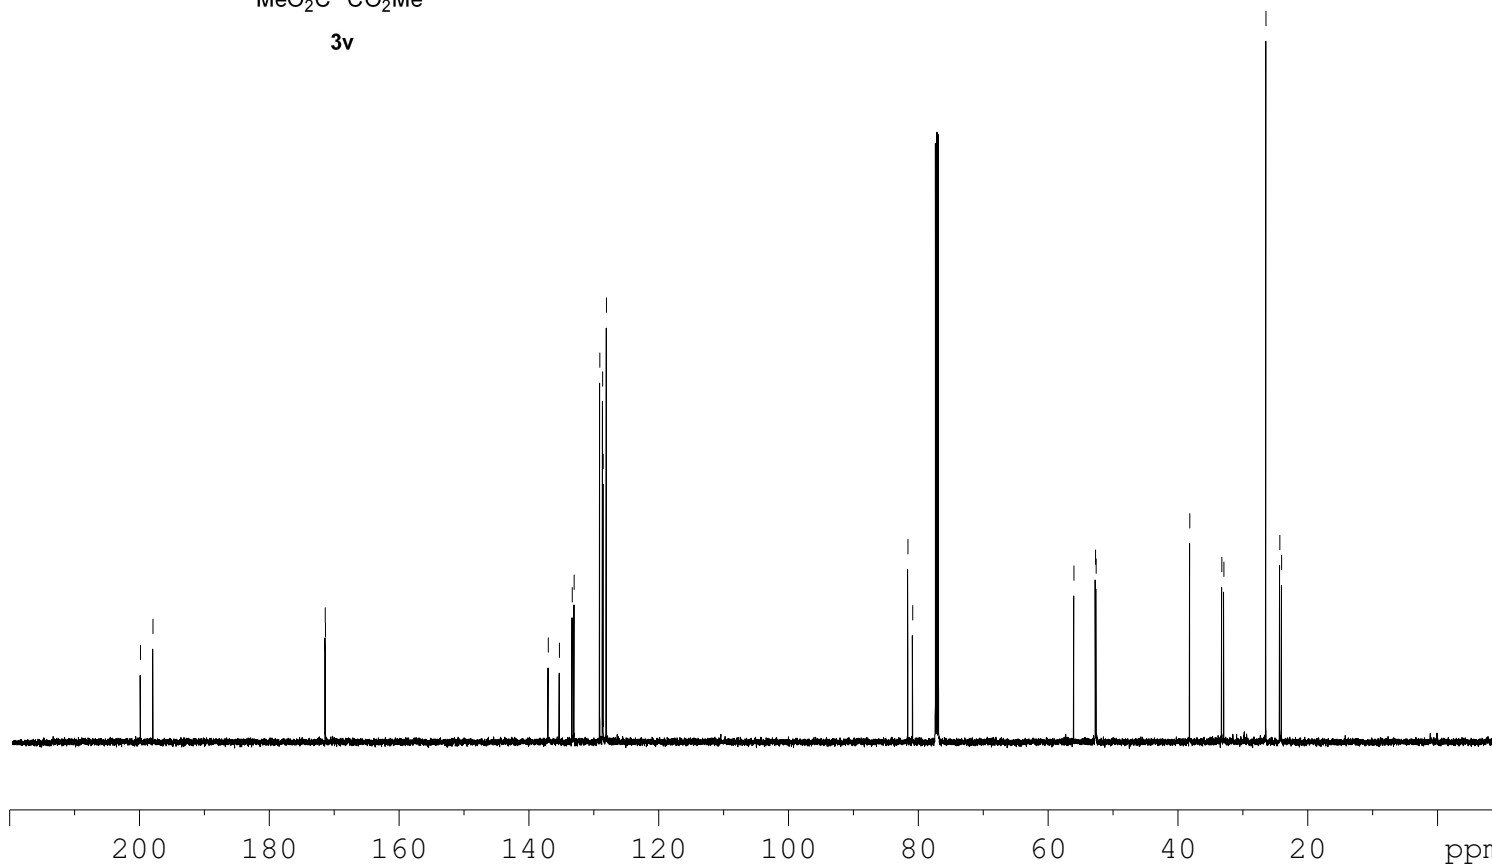

8.057  
8.045  
7.575  
7.563  
7.551  
7.471  
7.458  
7.445  
5.169  
5.164  
5.157  
5.151  
5.148  
5.144  
3.706  
3.697  
2.434  
2.429  
2.425  
2.422  
2.413  
2.266  
2.101  
2.088  
2.083  
2.079  
2.074  
2.072  
2.070  
2.067  
2.065  
2.057  
2.052  
2.046  
2.041  
2.036  
2.030  
2.026  
2.022  
2.017  
2.013  
2.006  
2.001  
1.996  
1.992  
1.985  
1.981  
1.978  
1.974  
1.971  
1.789  
1.784  
1.781  
1.774  
1.763  
1.760  
1.757  
1.280  
1.276  
1.270  
1.265  
1.257  
1.250  
1.240  
1.217  
1.113

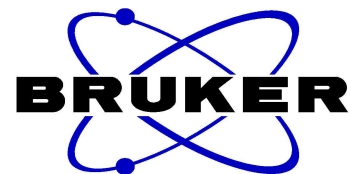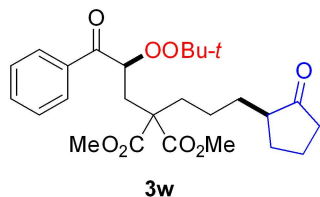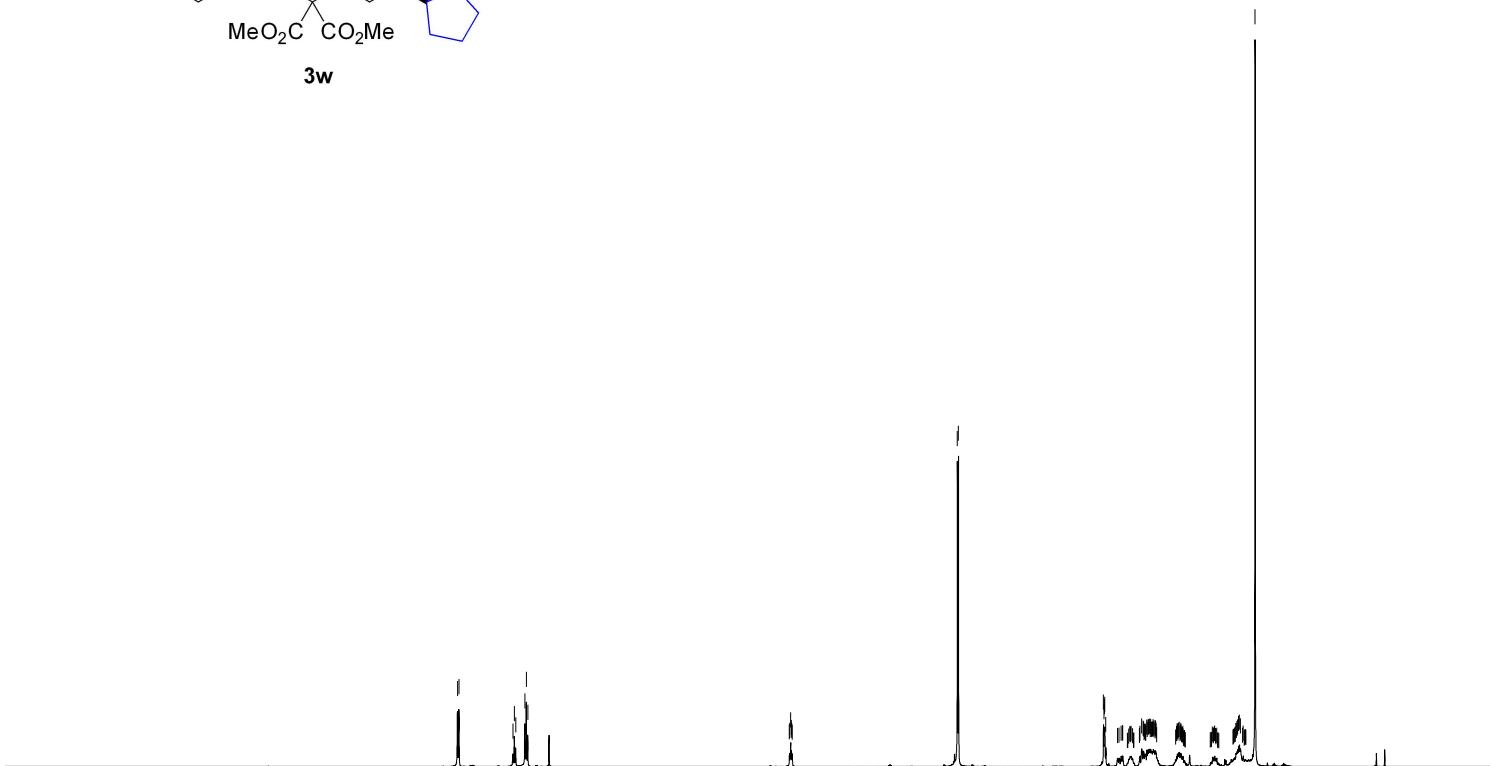

```

NAME      WLL-698P-20211122
EXPNO     1
PROCNO    1
Date_     20211122
Time      10.26
INSTRUM   spect
PROBHD    5 mm PABBO BB/
PULPROG   zg30
TD        65536
SOLVENT   CDC13
NS        8
DS        0
SWH       9615.385 Hz
FIDRES    0.146719 Hz
AQ        3.4079220 sec
RG        44.5
DW        52.000 usec
DE        6.50 usec
TE        295.9 K
D1        1.00000000 sec
TD0       1
  
```

```

===== CHANNEL f1 =====
SFO1     600.1739011 MHz
NUC1     1H
P1       9.96 usec
SI       65536
SF       600.1700151 MHz
WDW      EM
SSB      0
LB       0.30 Hz
GB       0
PC       1.00
  
```

11 10 9 8 7 6 5 4 3 2 1 0 ppm

2.00 0.98 2.05 1.00 3.09 3.03 1.98 1.01 1.08 2.08 3.14 2.10 1.11 3.08 9.09

220.966

197.940

171.366  
171.322

135.297  
135.282  
133.336  
129.067  
128.555

81.608  
81.529  
80.882  
80.865  
56.023  
55.953  
52.702  
52.608  
48.916  
48.833  
38.133  
38.114  
33.263  
33.228  
32.945  
32.877  
29.861  
29.789  
29.670  
29.604  
26.438  
22.437

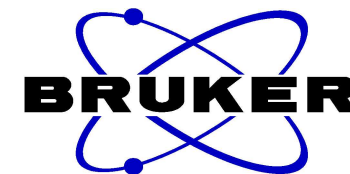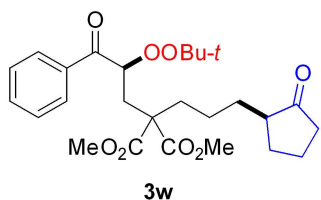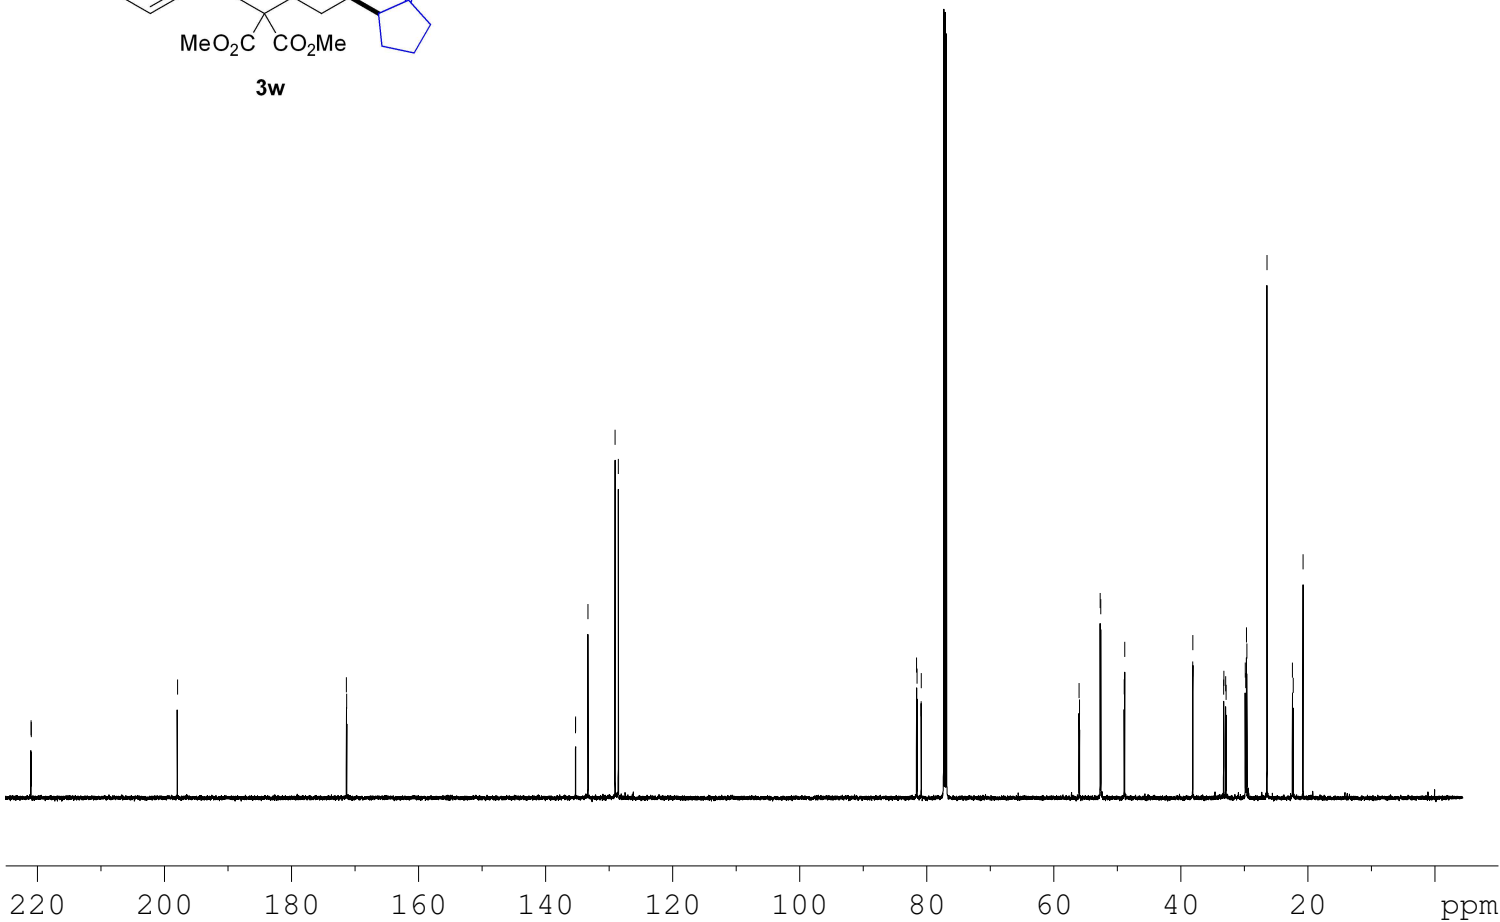

```

NAME      WLL-698P-20211122
EXPNO     2
PROCNO    1
Date_     20211122
Time      11.23
INSTRUM   spect
PROBHD    5 mm PABBO BB/
PULPROG   zgpg30
TD         65536
SOLVENT   CDC13
NS         1024
DS         4
SWH       36057.691 Hz
FIDRES    0.550197 Hz
AQ         0.9088159 sec
RG         190.02
DW         13.867 usec
DE         6.50 usec
TE         297.3 K
D1         2.00000000 sec
D11        0.03000000 sec
TD0        1

```

```

===== CHANNEL f1 =====
SFO1      150.9302215 MHz
NUC1       13C
P1         11.90 usec
SI         32768
SF         150.9128588 MHz
WDW        EM
SSB        0
LB         1.00 Hz
GB         0
PC         1.40

```

8.064  
8.052  
7.588  
7.576  
7.563  
7.487  
7.474  
7.462  
5.172  
5.165  
5.162  
5.160  
5.154  
5.151  
5.144  
4.215  
4.209  
4.203  
4.198  
4.194  
4.191  
4.186  
4.182  
4.176  
4.174  
3.710  
3.706  
3.705  
3.433  
3.421  
3.409  
2.437  
2.424  
2.414  
2.229  
2.227  
2.100  
2.092  
2.087  
2.079  
2.049  
2.029  
2.022  
1.893  
1.889  
1.882  
1.878  
1.874  
1.869  
1.866  
1.863  
1.851  
1.296  
1.285  
1.282  
1.277  
1.270  
1.258  
1.245  
1.241  
1.232  
1.229  
1.219  
1.125  
1.125

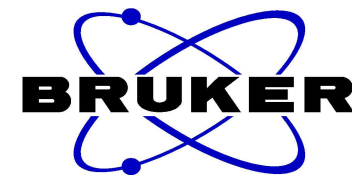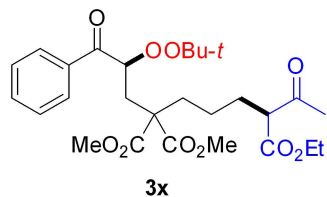

NAME w11-697p-20211118  
EXPNO 1  
PROCNO 1  
Date\_ 20211118  
Time 21.28  
INSTRUM spect  
PROBHD 5 mm PABBO BB/  
PULPROG zg30  
TD 65536  
SOLVENT CDCl3  
NS 8  
DS 0  
SWH 9615.385 Hz  
FIDRES 0.146719 Hz  
AQ 3.4079220 sec  
RG 69.87  
DW 52.000 usec  
DE 6.50 usec  
TE 297.6 K  
D1 1.00000000 sec  
TD0 1

===== CHANNEL f1 =====  
SFO1 600.1739011 MHz  
NUC1 1H  
P1 9.96 usec  
SI 65536  
SF 600.1700107 MHz  
WDW EM  
SSB 0  
LB 0.30 Hz  
GB 0  
PC 1.00

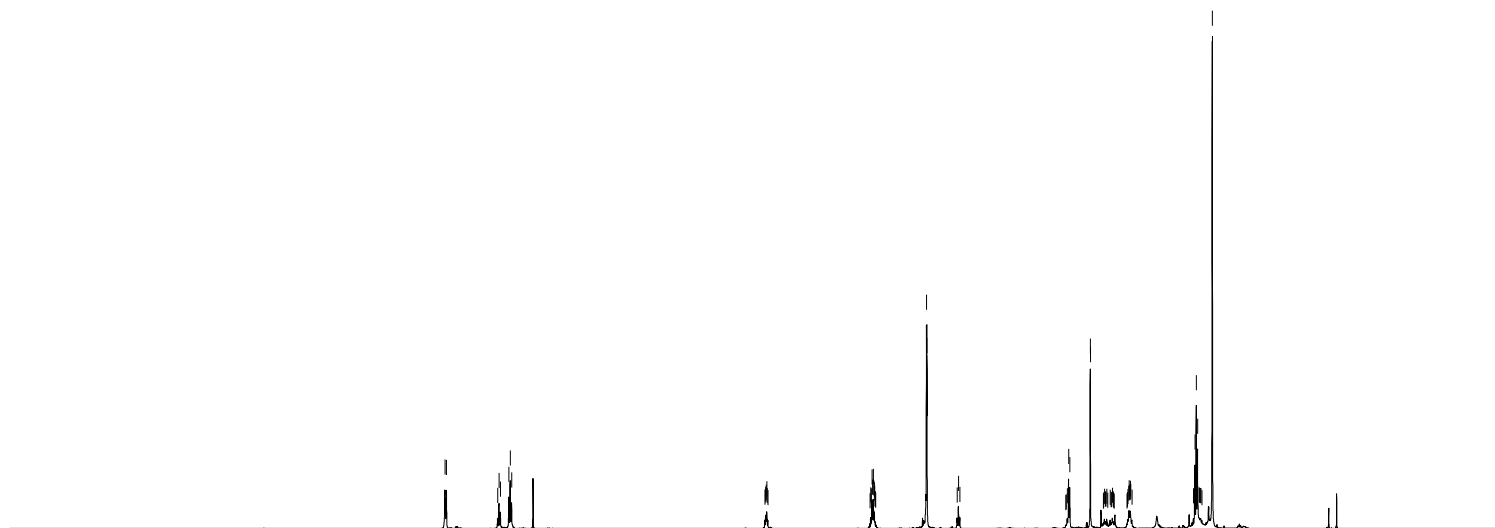

11 10 9 8 7 6 5 4 3 2 1 0 ppm

2.12  
1.05  
2.13  
1.00  
2.18  
3.01  
2.94  
1.01  
2.13  
2.99  
0.98  
1.01  
1.98  
5.01  
9.09

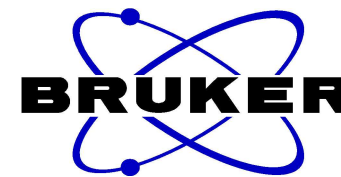

NAME w11-697p-20211118  
EXPNO 2  
PROCNO 1  
Date\_ 20211119  
Time\_ 0.32  
INSTRUM spect  
PROBHD 5 mm PABBO BB/  
PULPROG zgpg30  
TD 65536  
SOLVENT CDC13  
NS 200  
DS 4  
SWH 36057.691 Hz  
FIDRES 0.550197 Hz  
AQ 0.9088159 sec  
RG 190.02  
DW 13.867 usec  
DE 6.50 usec  
TE 298.7 K  
D1 2.0000000 sec  
D11 0.03000000 sec  
TD0 1

===== CHANNEL f1 =====  
SF01 150.9279571 MHz  
NUC1 13C  
P1 11.90 usec  
SI 32768  
SF 150.9128560 MHz  
WDW EM  
SSB 0  
LB 1.00 Hz  
GB 0  
PC 1.40

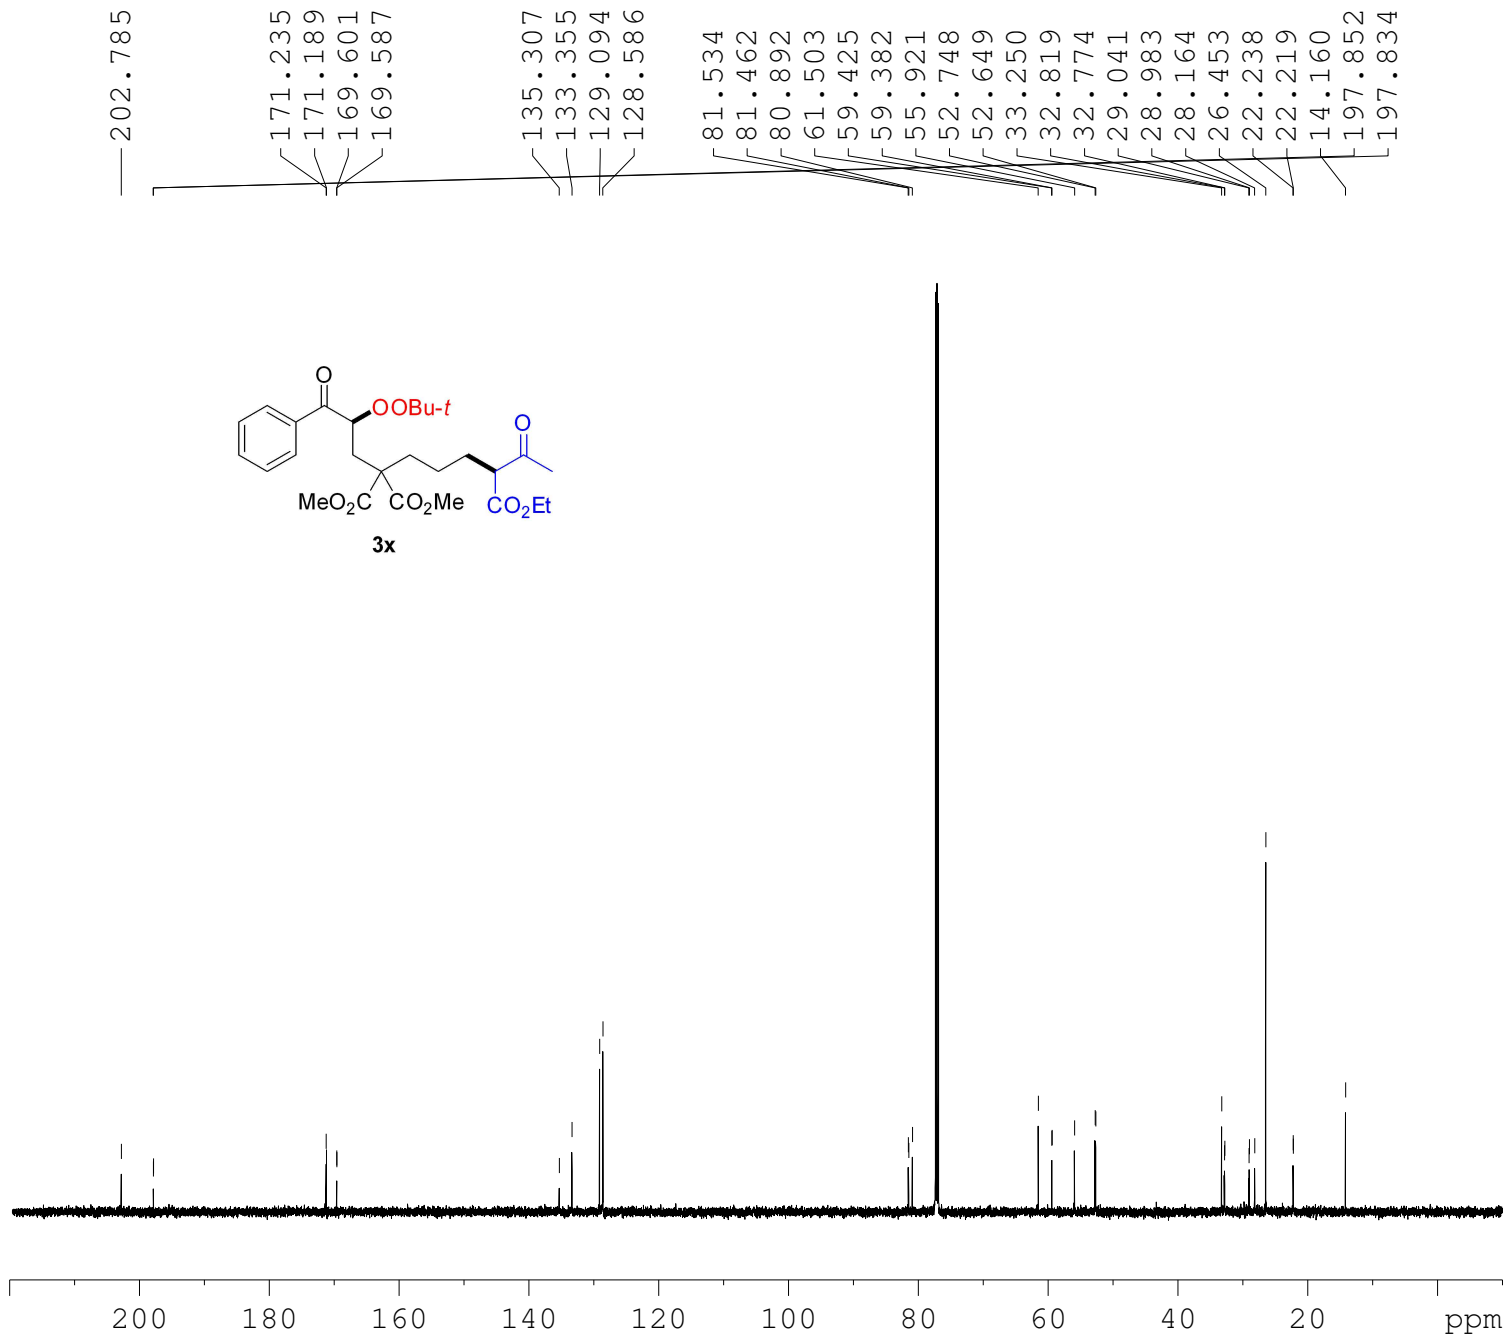

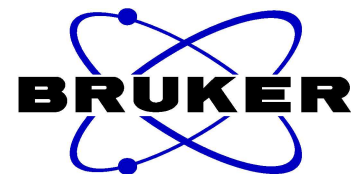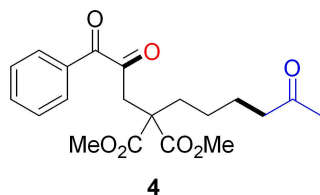

8.008  
7.996  
7.652  
7.639  
7.627  
7.510  
7.497  
7.484

3.762  
3.481  
2.449  
2.437  
2.424  
2.123  
2.072  
2.059  
2.044  
1.614  
1.601  
1.589  
1.577  
1.564  
1.308  
1.294  
1.282  
1.275  
1.267  
1.257

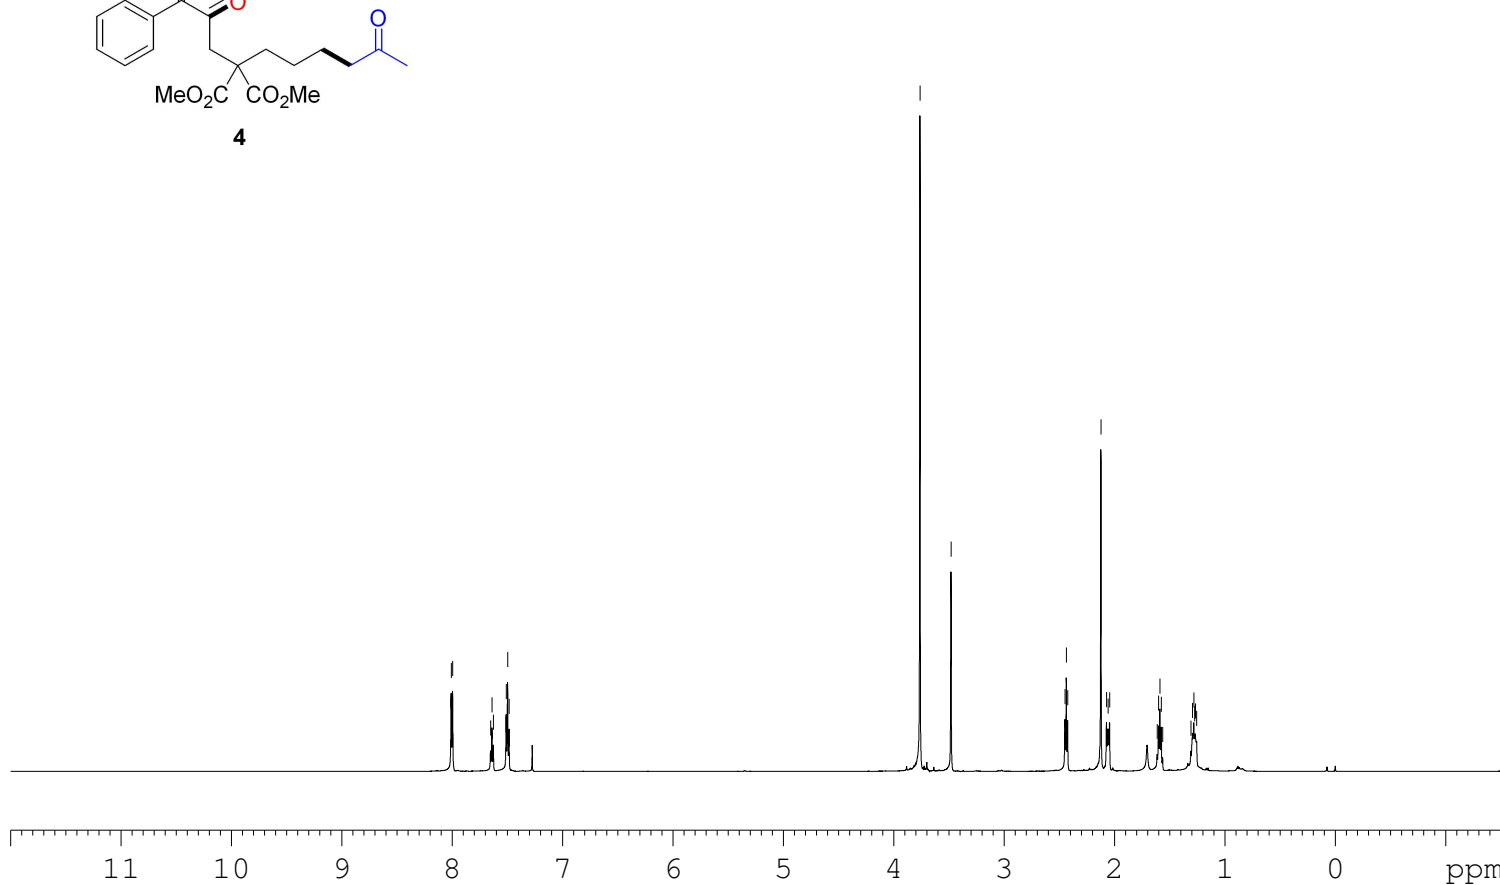

1.926  
1.000  
2.042

6.085  
1.992

2.067  
3.065  
1.934  
2.143  
2.150

NAME WLL-578PP-20210709  
EXPNO 1  
PROCNO 1  
Date\_ 20210709  
Time 15.52  
INSTRUM spect  
PROBHD 5 mm PABBO BB/  
PULPROG zg30  
TD 65536  
SOLVENT CDC13  
NS 8  
DS 0  
SWH 9615.385 Hz  
FIDRES 0.146719 Hz  
AQ 3.4079220 sec  
RG 56.75  
DW 52.000 usec  
DE 6.50 usec  
TE 301.1 K  
D1 1.00000000 sec  
TD0 1

===== CHANNEL f1 =====  
SFO1 600.1739011 MHz  
NUC1 1H  
P1 9.96 usec  
SI 65536  
SF 600.1700073 MHz  
WDW EM  
SSB 0  
LB 0.30 Hz  
GB 0  
PC 1.00

— 208.370  
— 198.970  
— 190.888  
— 171.020

134.607  
131.723  
130.473  
128.786

55.955  
52.903  
43.051  
41.215  
34.101  
29.892  
24.238  
23.618

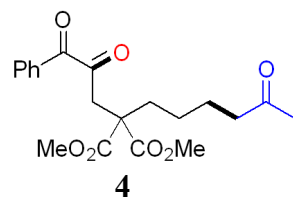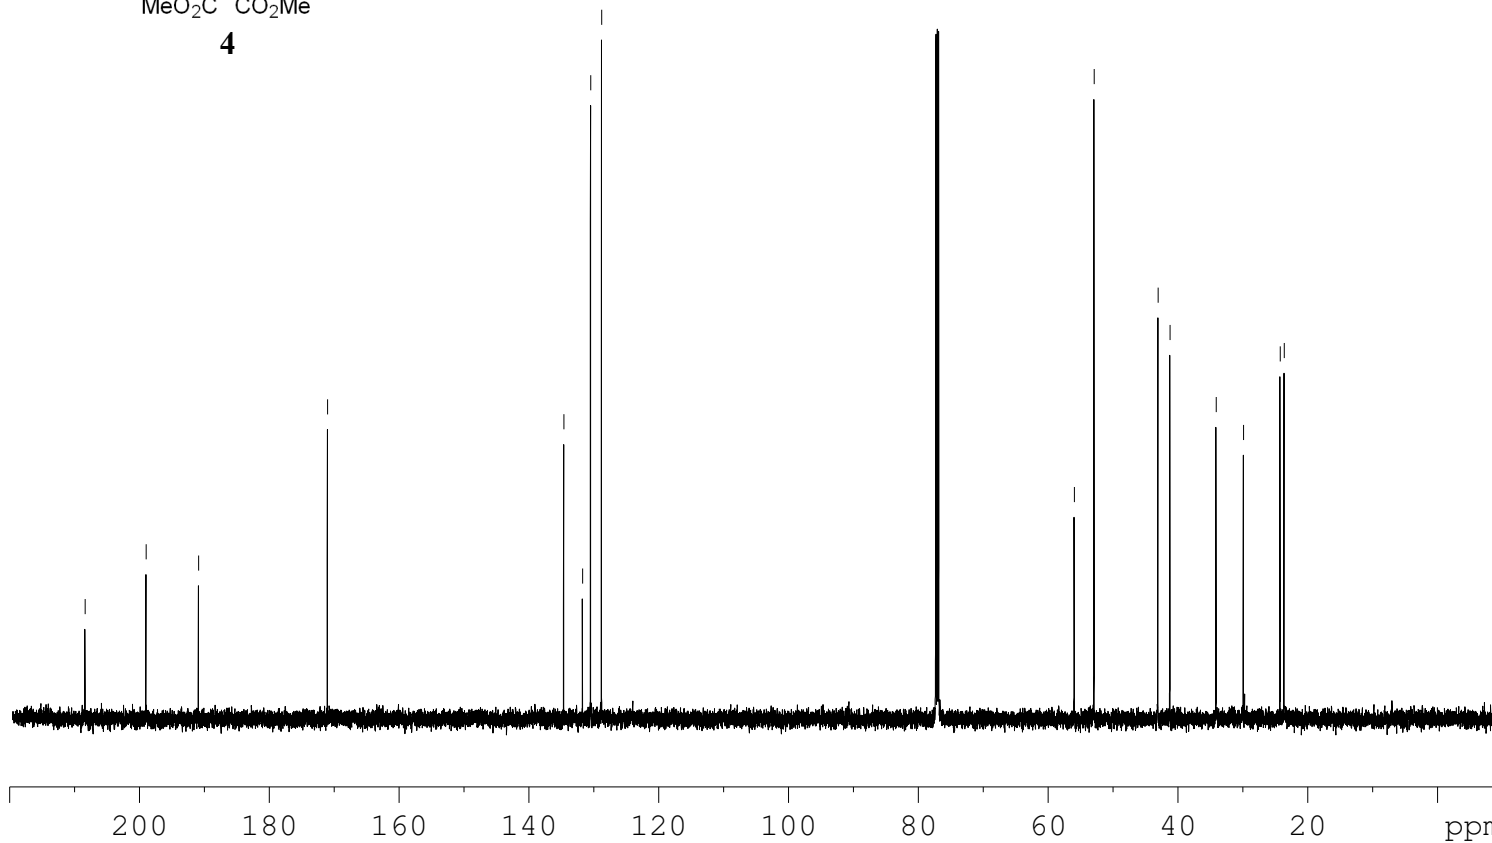

NAME WLL-578PP-20210709  
EXPNO 2  
PROCNO 1  
Date\_ 20210709  
Time 15.58  
INSTRUM spect  
PROBHD 5 mm PABBO BB/  
PULPROG zgpg30  
TD 65536  
SOLVENT CDCl3  
NS 100  
DS 4  
SWH 36057.691 Hz  
FIDRES 0.550197 Hz  
AQ 0.9088159 sec  
RG 190.02  
DW 13.867 usec  
DE 6.50 usec  
TE 302.2 K  
D1 2.00000000 sec  
D11 0.03000000 sec  
TD0 1

==== CHANNEL f1 =====  
SFO1 150.9279571 MHz  
NUC1 13C  
P1 14.00 usec  
SI 32768  
SF 150.9128665 MHz  
WDW EM  
SSB 0  
LB 1.00 Hz  
GB 0  
PC 1.40



8.014  
8.002  
7.663  
7.651  
7.638  
7.538  
7.525  
7.512  
5.748  
5.736  
5.733  
5.721  
3.841  
3.043  
3.031  
3.021  
3.014  
3.009  
2.466  
2.454  
2.447  
2.443  
2.435  
2.428  
2.422  
2.405  
2.168  
2.166  
2.160  
2.159  
2.145  
2.137  
2.130  
2.122  
1.800  
1.787  
1.785  
1.780  
1.778  
1.616  
1.603  
1.590  
1.577  
1.565

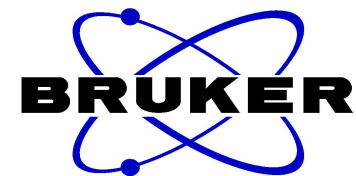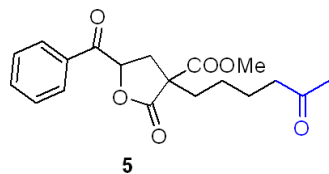

```

NAME      WLL-600-PRO-20211224
EXPNO     1
PROCNO    1
Date_     20211224
Time      16.17
INSTRUM   spect
PROBHD    5 mm PABBO BB/
PULPROG   zg30
TD        65536
SOLVENT   CDC13
NS         8
DS         0
SWH       9615.385 Hz
FIDRES    0.146719 Hz
AQ        3.4079220 sec
RG        62.22
DW        52.000 usec
DE        6.50 usec
TE        298.0 K
D1        1.00000000 sec
TD0       1

===== CHANNEL f1 =====
SFO1      600.1739011 MHz
NUC1      1H
P1        9.96 usec
SI        65536
SF        600.1700092 MHz
WDW       EM
SSB       0
LB        0.30 Hz
GB        0
PC        1.00
  
```

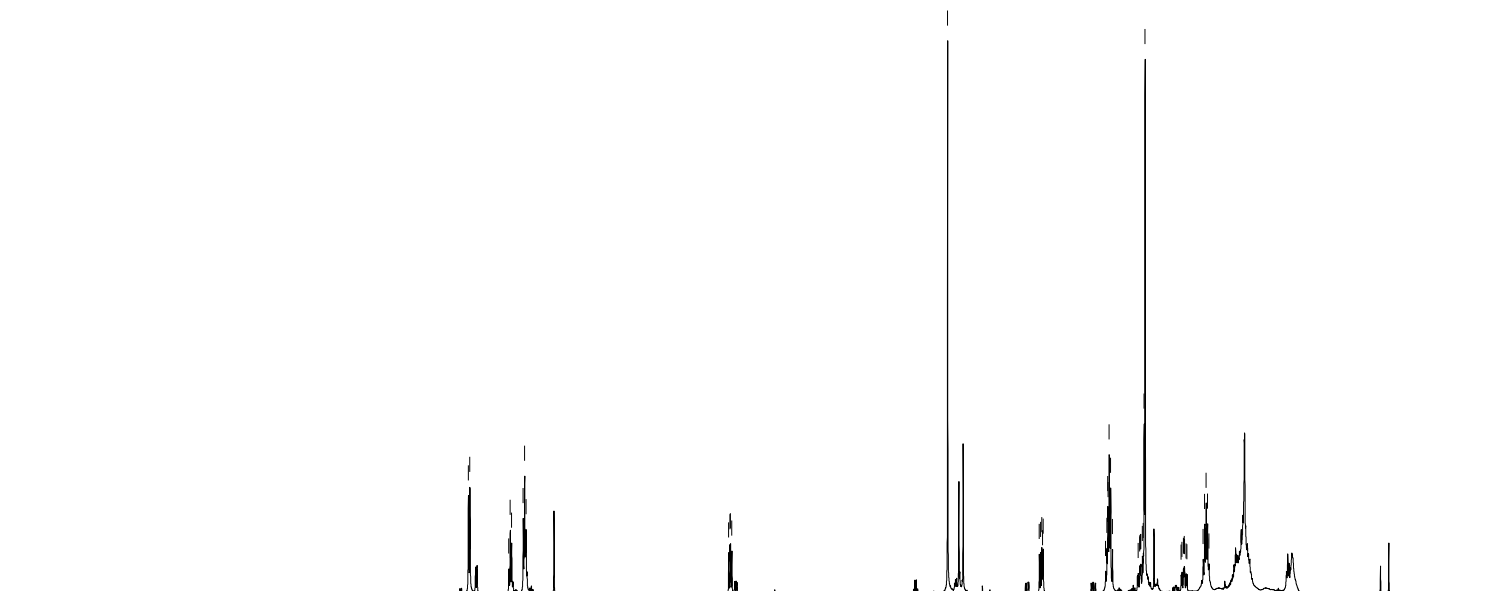

11 10 9 8 7 6 5 4 3 2 1 0 ppm

1.958  
0.490  
1.087  
2.007  
1.000  
0.248  
3.151  
0.994  
4.189  
5.231  
1.192  
1.918

— 208.37  
 < 193.95  
 < 193.31  
 < 172.82  
 < 169.56  
 < 169.40  
 < 134.40  
 < 134.13  
 < 133.92  
 < 128.99  
 < 128.96  
 < 128.93  
 < 128.72  
 < 76.91  
 < 76.65  
 < 55.16  
 < 53.50  
 < 42.93  
 < 42.91  
 — 34.02  
 — 29.91  
 — 24.24  
 < 23.37  
 < 23.33

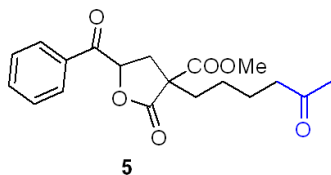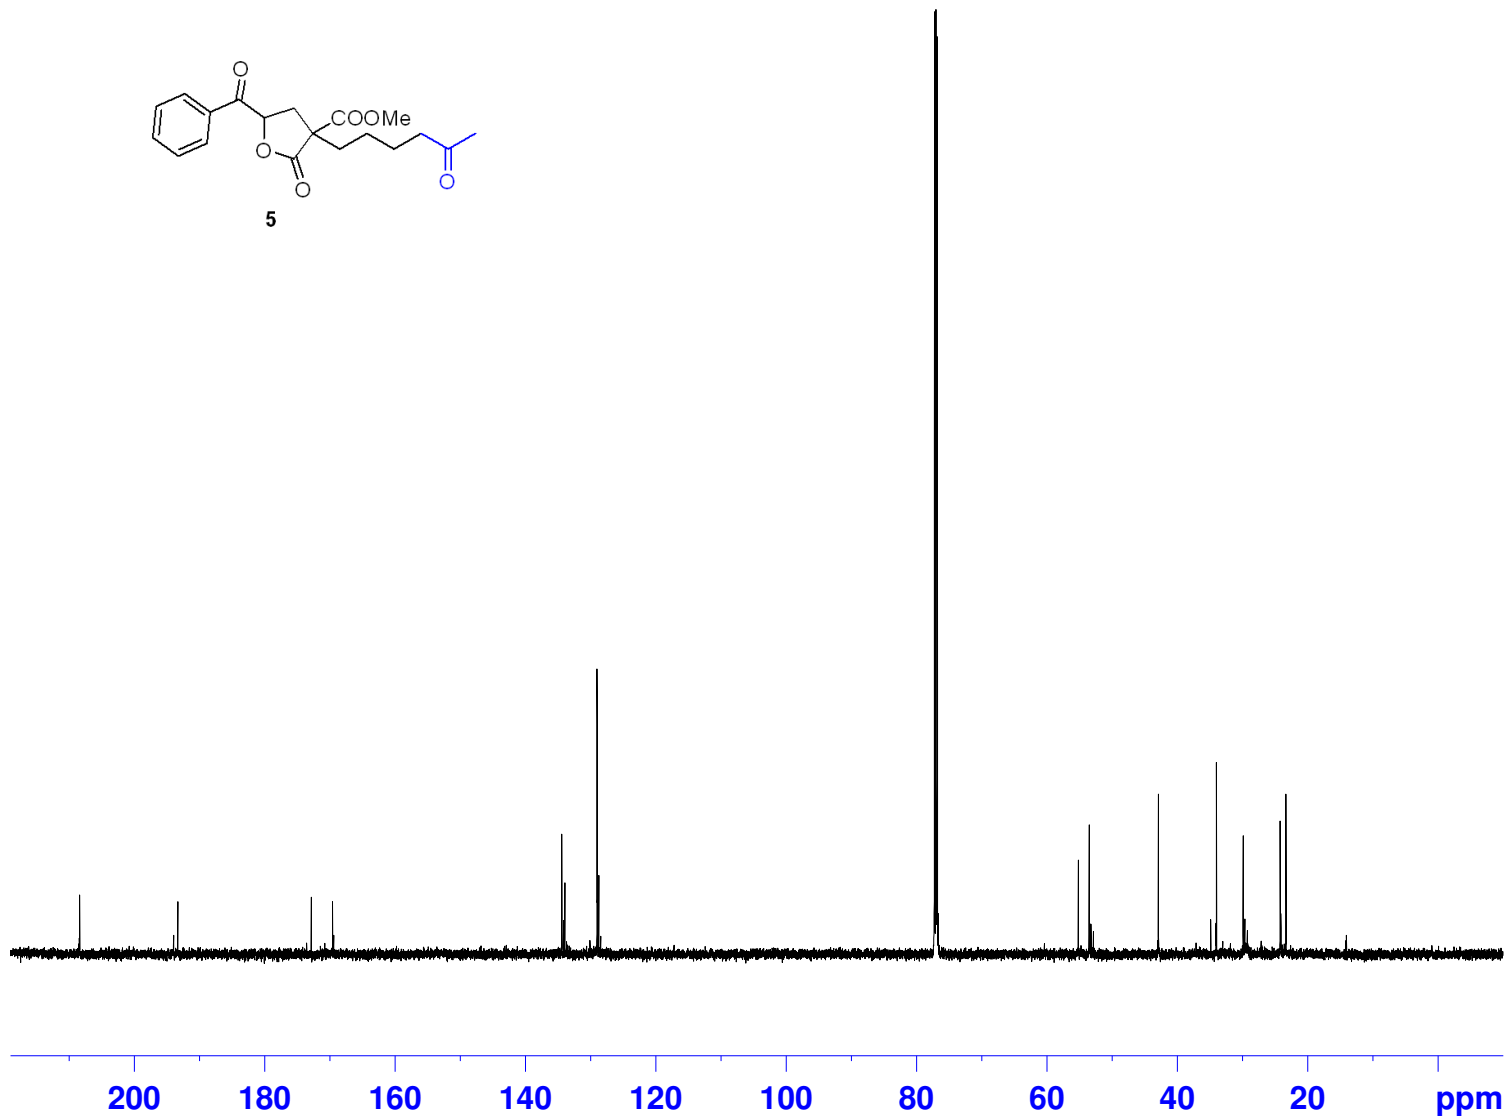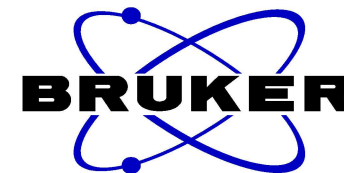

```

NAME      WLL-600-PRO-20211224
EXPNO     2
PROCNO    1
Date_     20211224
Time      16.52
INSTRUM   spect
PROBHD    5 mm PABBO BB/
PULPROG   zgpg30
TD         65536
SOLVENT   CDC13
NS         300
DS         4
SWH       36057.691 Hz
FIDRES    0.550197 Hz
AQ         0.9088159 sec
RG         190.02
DW         13.867 usec
DE         6.50 usec
TE         298.0 K
D1         2.00000000 sec
D11        0.03000000 sec
TD0        1
  
```

```

===== CHANNEL f1 =====
SFO1     150.9279571 MHz
NUC1      13C
P1        11.90 usec
SI        32768
SF        150.9128726 MHz
WDW       EM
SSB       0
LB        1.00 Hz
GB        0
PC        1.40
  
```

8.069  
8.057  
7.588  
7.576  
7.564  
7.484  
7.471  
7.458

5.170  
5.161  
5.158  
5.149  
3.716  
3.708  
2.450  
2.437  
2.428  
2.425  
2.411  
2.398  
2.131  
2.105  
2.097  
2.089  
2.082  
2.068  
2.061  
2.038  
2.030  
2.017  
2.009  
1.994  
1.986  
1.631  
1.618  
1.605  
1.593  
1.580  
1.261  
1.254  
1.240  
1.232  
1.219  
1.211  
1.202

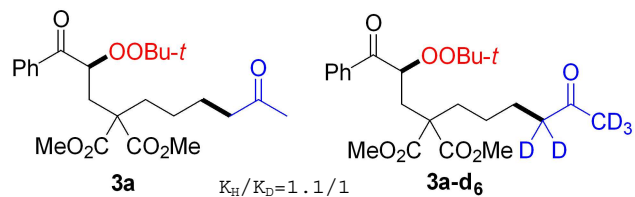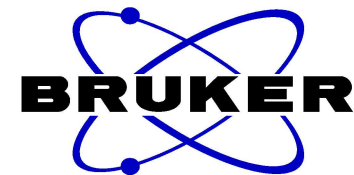

```

NAME      wll-614p-20211118
EXPNO     1
PROCNO    1
Date_     20211118
Time      21.23
INSTRUM   spect
PROBHD    5 mm PABBO BB/
PULPROG   zg30
TD         65536
SOLVENT   CDC13
NS         8
DS         0
SWH       9615.385 Hz
FIDRES    0.146719 Hz
AQ         3.4079220 sec
RG         69.87
DW         52.000 usec
DE         6.50 usec
TE         297.7 K
D1         1.00000000 sec
TD0        1
  
```

```

===== CHANNEL f1 =====
SFO1     600.1739011 MHz
NUC1      1H
P1        9.96 usec
SI        65536
SF        600.1700098 MHz
WDW       EM
SSB       0
LB        0.30 Hz
GB         0
PC         1.00
  
```

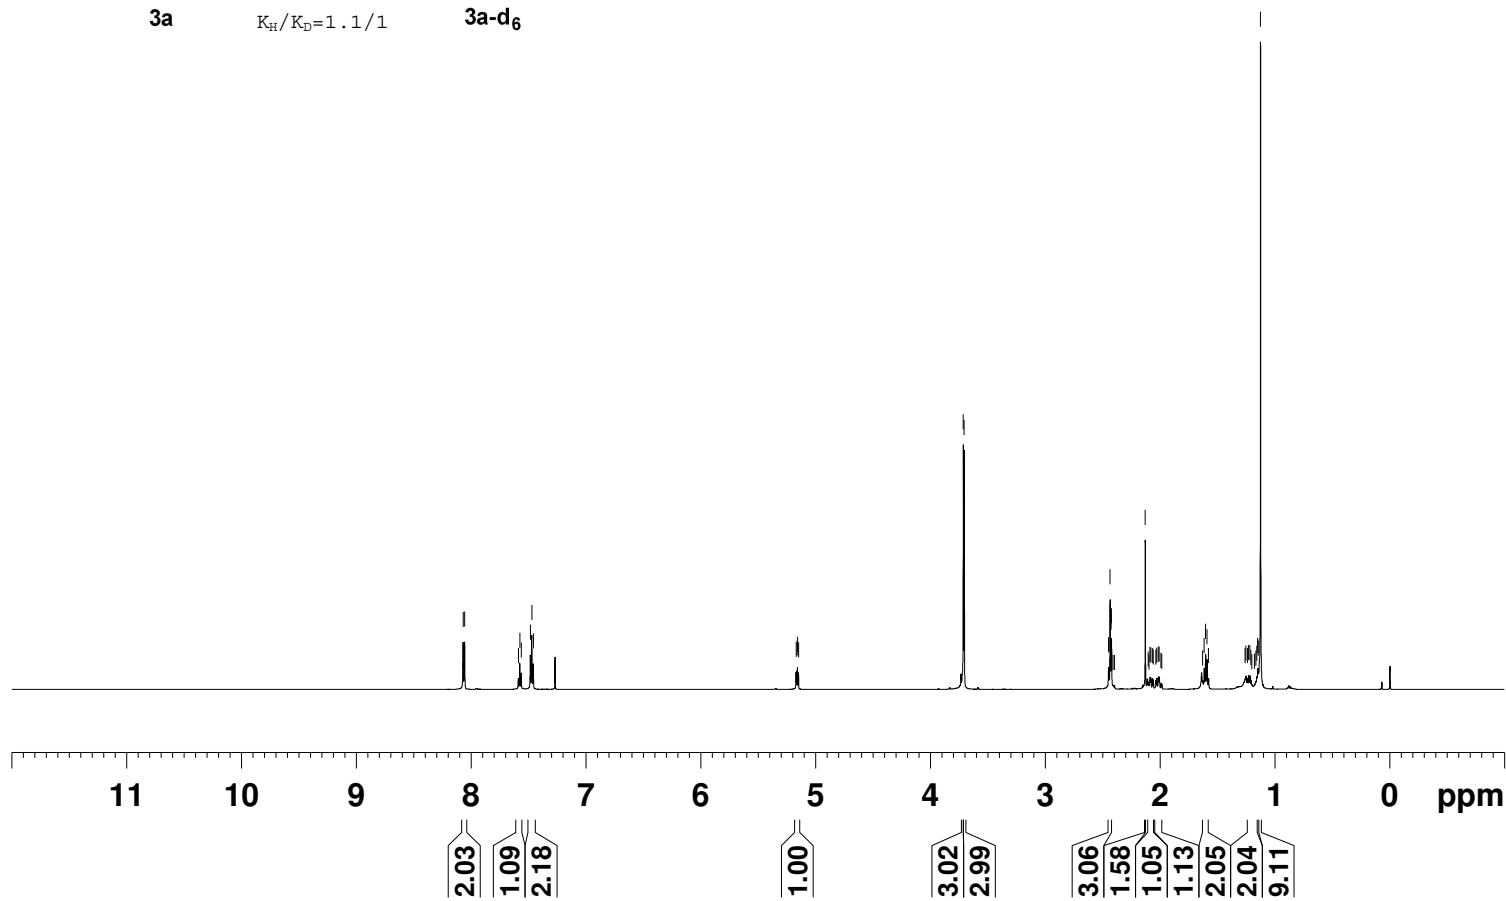

7.952  
7.934  
7.574  
7.555  
7.537  
7.472  
7.452  
7.434  
5.743  
5.724  
5.718  
5.706  
5.699  
5.682  
5.675  
5.663  
5.657  
5.638  
5.157  
5.154  
5.125  
5.123  
5.120  
5.116  
5.111  
5.099  
3.720  
3.021  
3.014  
2.994  
2.974  
2.955  
2.932  
2.914  
2.719  
2.700  
2.302

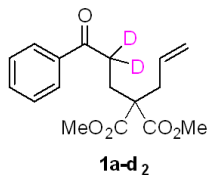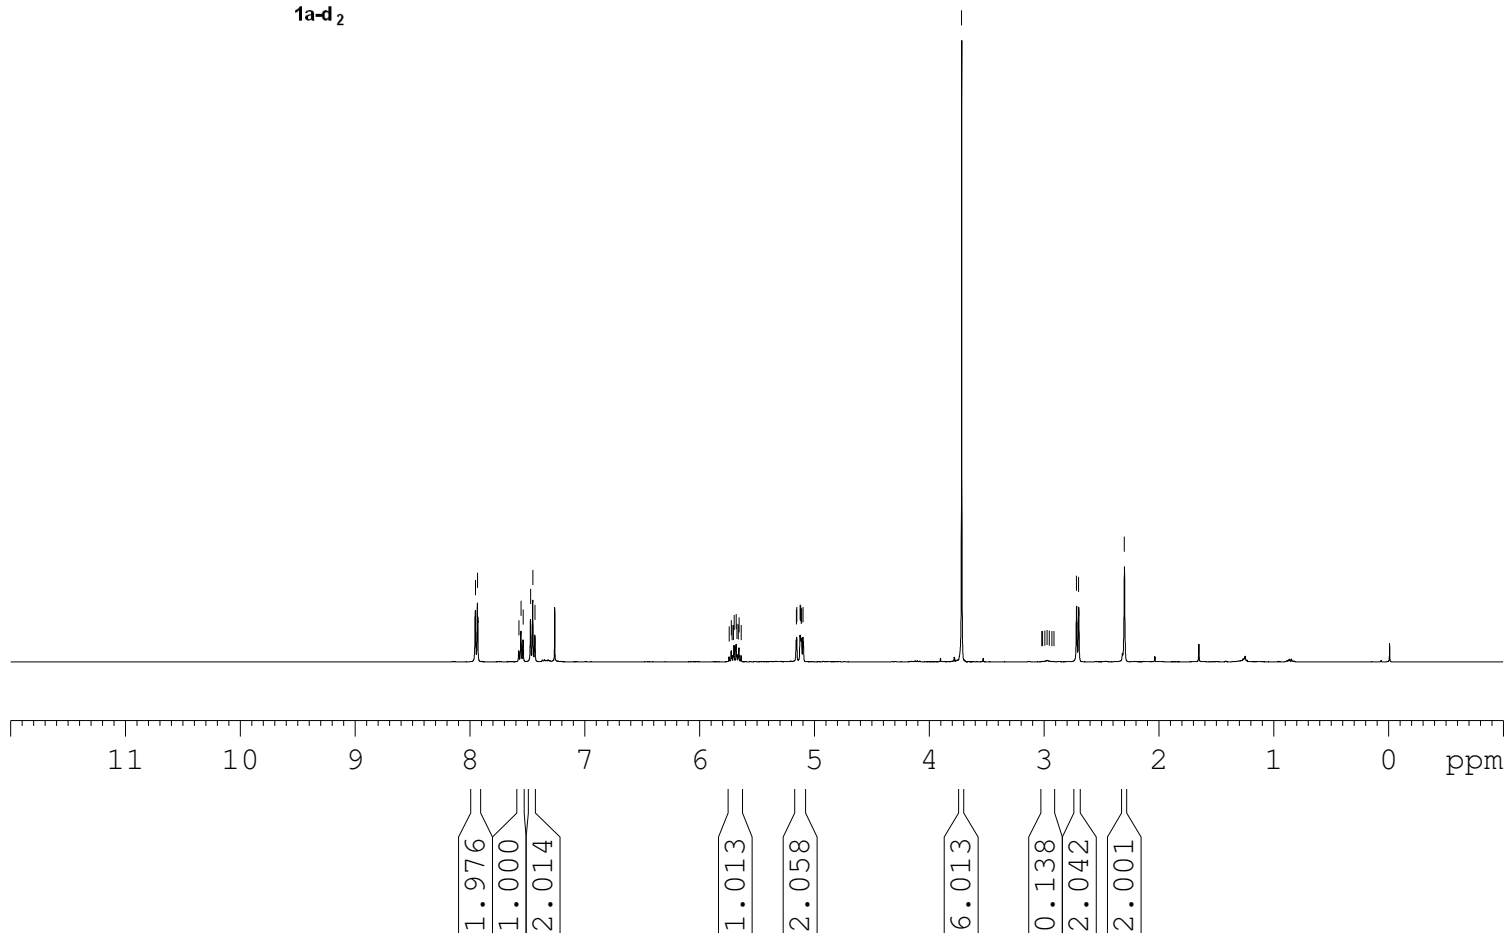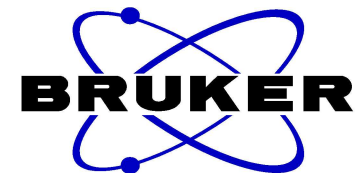

NAME w11-3-22-1-20210323  
EXPNO 1  
PROCNO 1  
Date\_ 20210323  
Time 15.14  
INSTRUM spect  
PROBHD 5 mm PADUL 13C  
PULPROG zg30  
TD 32768  
SOLVENT CDCl3  
NS 8  
DS 0  
SWH 6393.862 Hz  
FIDRES 0.195125 Hz  
AQ 2.5625076 sec  
RG 161  
DW 78.200 usec  
DE 6.50 usec  
TE 294.9 K  
D1 1.00000000 sec  
TD0 1

===== CHANNEL f1 =====  
NUC1 1H  
P1 10.40 usec  
PL1 -1.00 dB  
PL1W 17.01305389 W  
SFO1 400.1326008 MHz  
SI 32768  
SF 400.1300098 MHz  
WDW EM  
SSB 0  
LB 0.30 Hz  
GB 0  
PC 1.00

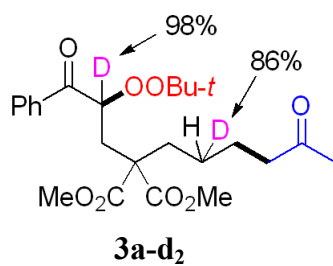

8.058  
 8.046  
 7.579  
 7.566  
 7.554  
 7.475  
 7.462  
 7.449

3.704  
 3.697  
 2.439  
 2.426  
 2.411  
 2.120  
 2.088  
 2.082  
 2.075  
 2.065  
 2.059  
 2.052  
 2.044  
 2.013  
 2.007  
 2.000  
 1.992  
 1.984  
 1.977  
 1.969  
 1.605  
 1.593  
 1.580  
 1.567  
 1.227  
 1.220  
 1.208  
 1.200  
 1.188  
 1.177  
 1.169  
 1.117  
 1.160  
 5.152

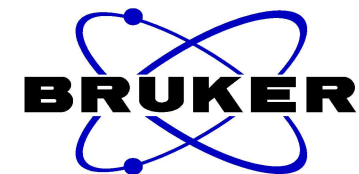

NAME w11-599p-20210727  
 EXPNO 1  
 PROCNO 1  
 Date\_ 20210727  
 Time 19.53  
 INSTRUM spect  
 PROBHD 5 mm PABBO BB/  
 PULPROG zg30  
 TD 65536  
 SOLVENT CDCl3  
 NS 8  
 DS 0  
 SWH 9615.385 Hz  
 FIDRES 0.146719 Hz  
 AQ 3.4079220 sec  
 RG 62.22  
 DW 52.000 usec  
 DE 6.50 usec  
 TE 298.1 K  
 D1 1.00000000 sec  
 TD0 1

===== CHANNEL f1 =====  
 SFO1 600.1739011 MHz  
 NUC1 1H  
 P1 9.96 usec  
 SI 65536  
 SF 600.1700154 MHz  
 WDW EM  
 SSB 0  
 LB 0.30 Hz  
 GB 0  
 PC 1.00

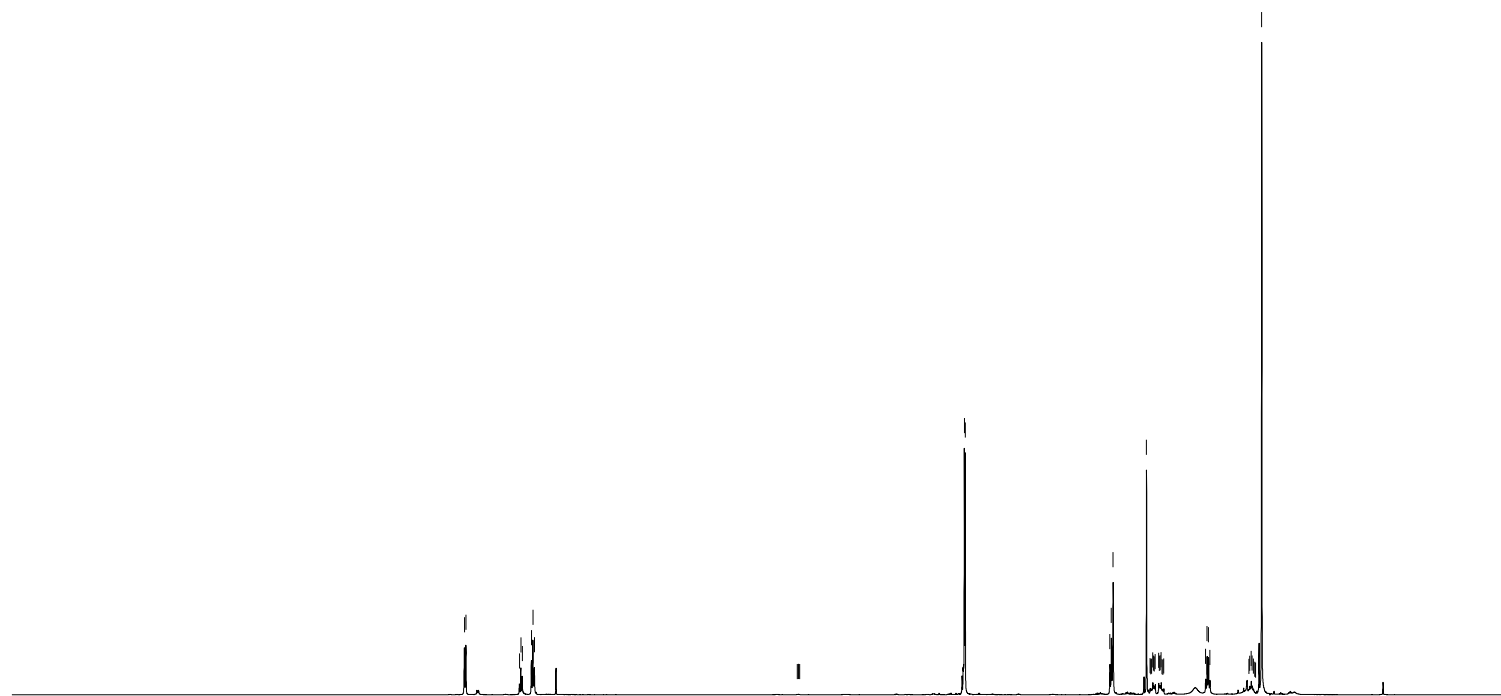

2.00  
 1.04  
 2.13

0.02

3.09  
 3.09

4.10  
 3.07  
 1.02  
 1.01  
 1.96  
 1.14  
 9.12

— 208.559

— 197.931

< 171.323  
< 171.282

< 135.205  
< 133.311  
< 129.021  
< 128.512

— 80.829

< 55.901  
< 52.662  
< 52.566  
— 43.191  
< 33.112  
< 32.727  
< 29.935  
< 26.376  
< 23.676

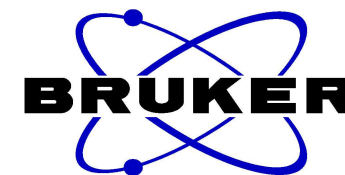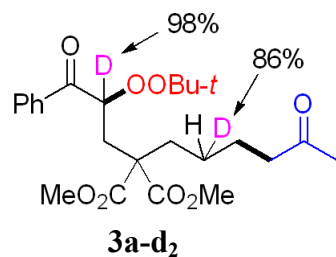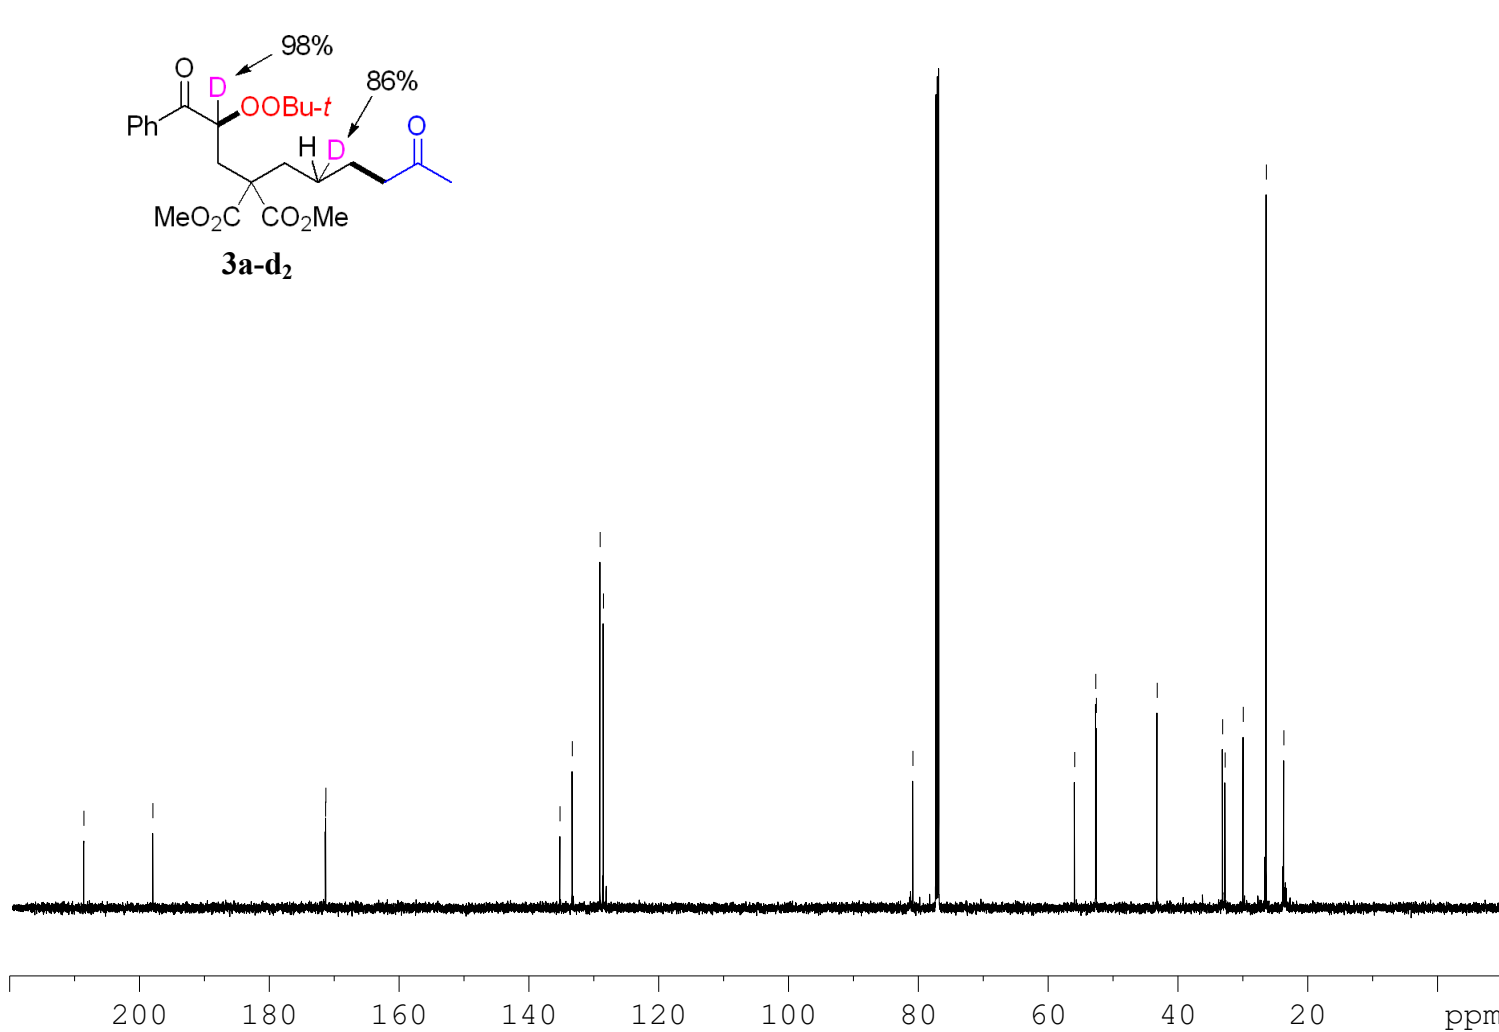

NAME w11-599p-20210727  
EXPNO 2  
PROCNO 1  
Date\_ 20210727  
Time 20.09  
INSTRUM spect  
PROBHD 5 mm PABBO BE/  
PULPROG zgpg30  
TD 65536  
SOLVENT CDCl3  
NS 240  
DS 4  
SWH 36057.691 Hz  
FIDRES 0.550197 Hz  
AQ 0.9088159 sec  
RG 190.02  
DW 13.867 usec  
DE 6.50 usec  
TE 298.2 K  
D1 2.00000000 sec  
D11 0.03000000 sec  
TD0 1

==== CHANNEL f1 =====  
SFO1 150.9279571 MHz  
NUC1 13C  
P1 14.00 usec  
SI 32768  
SF 150.9128665 MHz  
WDW EM  
SSB 0  
LB 1.00 Hz  
GB 0  
PC 1.40
